# Supplementary material for: Canavanine utilization via homoserine and hydroxyguanidine by a PLP-dependent γ-lyase in Pseudomonadaceae and Rhizobiales
Source: Royal Society of Chemistry journal article supplement (doi:10.1039/d2cb00128d), 2022-01-01
Supplement: d2cb00128d2.zip [file d2cb00128d2.zip]

## Sheet: Sheet1
Accession	Description	ΣCoverage	Gly: Area	Can: Area	ratio area Can/Gly
MBJ2347155.1	aminotransferase class I/II-fold pyridoxal phosphate-dependent enzyme [Pseudomonas canavaninivorans]	75.75	0	5.24355e+09	#DIV/0!
MBJ2347157.1	transporter substrate-binding domain-containing protein [Pseudomonas canavaninivorans]	72.69	0	8.22501e+08	#DIV/0!
MBJ2347154.1	aldehyde dehydrogenase family protein [Pseudomonas canavaninivorans]	60.62	0	1.2442e+09	#DIV/0!
MBJ2347000.1	aldehyde dehydrogenase family protein [Pseudomonas canavaninivorans]	53.4	0	3.0423e+09	#DIV/0!
MBJ2347151.1	B3/4 domain-containing protein [Pseudomonas canavaninivorans]	51.08	0	1.17731e+08	#DIV/0!
MBJ2345991.1	aspartate ammonia-lyase [Pseudomonas canavaninivorans]	50.21	0	3.07656e+08	#DIV/0!
MBJ2348968.1	acetyl-CoA C-acyltransferase FadA [Pseudomonas canavaninivorans]	49.36	0	1.50655e+08	#DIV/0!
MBJ2347152.1	threonine synthase [Pseudomonas canavaninivorans]	38.63	0	8.73844e+07	#DIV/0!
MBJ2345989.1	asparaginase [Pseudomonas canavaninivorans]	26.95	0	1.03566e+08	#DIV/0!
MBJ2347087.1	TonB-dependent siderophore receptor [Pseudomonas canavaninivorans]	25.79	0	3.49744e+07	#DIV/0!
MBJ2346824.1	aspartate aminotransferase family protein [Pseudomonas canavaninivorans]	25.06	0	2.32078e+07	#DIV/0!
MBJ2347931.1	extracellular solute-binding protein [Pseudomonas canavaninivorans]	22.02	0	1.37155e+07	#DIV/0!
MBJ2347159.1	ABC transporter permease [Pseudomonas canavaninivorans]	21.19	0	2.29213e+08	#DIV/0!
MBJ2350007.1	phage holin family protein [Pseudomonas canavaninivorans]	20.28	0	6.30258e+06	#DIV/0!
MBJ2347150.1	helix-turn-helix domain-containing protein [Pseudomonas canavaninivorans]	19.5	0	2.61602e+07	#DIV/0!
MBJ2347092.1	TauD/TfdA family dioxygenase [Pseudomonas canavaninivorans]	18.24	0	10790902	#DIV/0!
MBJ2350178.1	TatD family hydrolase [Pseudomonas canavaninivorans]	15.91	0	4.50147e+06	#DIV/0!
MBJ2347153.1	Lrp/AsnC family transcriptional regulator [Pseudomonas canavaninivorans]	15.86	0	2.82662e+07	#DIV/0!
MBJ2346087.1	D-amino acid dehydrogenase [Pseudomonas canavaninivorans]	15.67	0	8.36622e+06	#DIV/0!
MBJ2346985.1	1-acyl-sn-glycerol-3-phosphate acyltransferase [Pseudomonas canavaninivorans]	15.53	0	6.49366e+06	#DIV/0!
MBJ2345745.1	NADH-quinone oxidoreductase subunit NuoK [Pseudomonas canavaninivorans]	13.73	0	3.12863e+07	#DIV/0!
MBJ2347773.1	uracil-DNA glycosylase [Pseudomonas canavaninivorans]	12.61	0	1.3198e+07	#DIV/0!
MBJ2346727.1	nuclear transport factor 2 family protein [Pseudomonas canavaninivorans]	12.18	0	1.07108e+07	#DIV/0!
MBJ2345268.1	isocitrate lyase/phosphoenolpyruvate mutase family protein [Pseudomonas canavaninivorans]	11.52	0	8.46091e+06	#DIV/0!
MBJ2345311.1	AraC family transcriptional regulator [Pseudomonas canavaninivorans]	10.87	0	4.07217e+06	#DIV/0!
MBJ2347010.1	ethanolamine ammonia-lyase subunit EutC [Pseudomonas canavaninivorans]	10.58	0	5.89582e+07	#DIV/0!
MBJ2345677.1	nucleoside hydrolase [Pseudomonas canavaninivorans]	9.36	0	1.4689e+07	#DIV/0!
MBJ2348374.1	CoA-acylating methylmalonate-semialdehyde dehydrogenase [Pseudomonas canavaninivorans]	9	0	6.0108e+06	#DIV/0!
MBJ2349603.1	3-methyl-2-oxobutanoate dehydrogenase (2-methylpropanoyl-transferring) subunit alpha [Pseudomonas canavaninivorans]	8.76	0	4.29623e+06	#DIV/0!
MBJ2346712.1	ribonuclease III [Pseudomonas canavaninivorans]	7.86	0	1.11926e+07	#DIV/0!
MBJ2348530.1	FTR1 family protein [Pseudomonas canavaninivorans]	7.28	0	8.77096e+06	#DIV/0!
MBJ2348496.1	2-octaprenyl-3-methyl-6-methoxy-1,4-benzoquinol hydroxylase [Pseudomonas canavaninivorans]	7.16	0	6.18007e+06	#DIV/0!
MBJ2345532.1	Fic family protein [Pseudomonas canavaninivorans]	6.7	0	4.81211e+06	#DIV/0!
MBJ2350438.1	PLP-dependent aminotransferase family protein [Pseudomonas canavaninivorans]	6.7	0	1.03293e+07	#DIV/0!
MBJ2348936.1	heme ABC transporter permease [Pseudomonas canavaninivorans]	6.37	0	7544674	#DIV/0!
MBJ2346522.1	iron-containing alcohol dehydrogenase [Pseudomonas canavaninivorans]	5.97	0	2.0523e+08	#DIV/0!
MBJ2347344.1	GMC family oxidoreductase [Pseudomonas canavaninivorans]	5.65	0	3.81454e+06	#DIV/0!
MBJ2350304.1	acetyl/propionyl/methylcrotonyl-CoA carboxylase subunit alpha [Pseudomonas canavaninivorans]	4.78	0	3.05622e+06	#DIV/0!
MBJ2348575.1	bifunctional tRNA (5-methylaminomethyl-2-thiouridine)(34)-methyltransferase MnmD/FAD-dependent 5-carboxymethylaminomethyl-2-thiouridine(34) oxidoreductase MnmC [Pseudomonas canavaninivorans]	4.7	0	1.38499e+06	#DIV/0!
MBJ2345529.1	FAD-binding oxidoreductase [Pseudomonas canavaninivorans]	4.45	0	1.54443e+07	#DIV/0!
MBJ2349641.1	poly-beta-1,6 N-acetyl-D-glucosamine export porin PgaA [Pseudomonas canavaninivorans]	3.87	0	5.50562e+06	#DIV/0!
MBJ2347097.1	cyclic peptide export ABC transporter [Pseudomonas canavaninivorans]	3.84	0	5.11728e+06	#DIV/0!
MBJ2346834.1	cytochrome o ubiquinol oxidase subunit I [Pseudomonas canavaninivorans]	3.7	0	1.44555e+07	#DIV/0!
MBJ2347096.1	amino acid adenylation domain-containing protein [Pseudomonas canavaninivorans]	2.86	0	3.7816e+06	#DIV/0!
MBJ2348735.1	NACHT domain-containing protein [Pseudomonas canavaninivorans]	1.49	0	1.3054e+07	#DIV/0!
MBJ2346999.1	homoserine dehydrogenase [Pseudomonas canavaninivorans]	70.17	5.8111e+06	1.46729e+10	2524.98
MBJ2345990.1	alanine:cation symporter family protein [Pseudomonas canavaninivorans]	23.19	1.14842e+07	6.79116e+08	59.1351
MBJ2347158.1	ABC transporter permease [Pseudomonas canavaninivorans]	42.56	1.10327e+07	5.91263e+08	53.5918
MBJ2347160.1	ATP-binding cassette domain-containing protein [Pseudomonas canavaninivorans]	68.77	1.95433e+07	5.43147e+08	27.792
MBJ2348772.1	ATP-binding cassette domain-containing protein [Pseudomonas canavaninivorans]	35.43	2.88248e+07	4.07054e+08	14.1217
MBJ2345854.1	glutamate/aspartate:proton symporter GltP [Pseudomonas canavaninivorans]	13.09	2.79292e+06	1.95805e+07	7.01075
MBJ2347520.1	Bax inhibitor-1/YccA family protein [Pseudomonas canavaninivorans]	9.42	3.00146e+06	1.75671e+07	5.85283
MBJ2349379.1	zinc-binding alcohol dehydrogenase family protein [Pseudomonas canavaninivorans]	22.26	2.90382e+06	1.65683e+07	5.70569
MBJ2346610.1	acyl-CoA dehydrogenase family protein [Pseudomonas canavaninivorans]	13.6	4.09542e+06	2.33664e+07	5.70549
MBJ2347287.1	transporter substrate-binding domain-containing protein [Pseudomonas canavaninivorans]	6.67	2.03552e+07	1.10326e+08	5.42002
MBJ2349754.1	oxaloacetate decarboxylase [Pseudomonas canavaninivorans]	57.09	6.89854e+07	3.13052e+08	4.53794
MBJ2346717.1	leucyl aminopeptidase [Pseudomonas canavaninivorans]	58.87	5.3507e+07	2.22753e+08	4.16305
MBJ2348155.1	amidase [Pseudomonas canavaninivorans]	6.77	2.27222e+06	7.84246e+06	3.45145
MBJ2347100.1	diaminobutyrate--2-oxoglutarate transaminase [Pseudomonas canavaninivorans]	30.04	8.09703e+06	2.74779e+07	3.39358
MBJ2348775.1	ABC transporter permease [Pseudomonas canavaninivorans]	17.77	3.39215e+07	1.11086e+08	3.27478
MBJ2345904.1	chromosomal replication initiator protein DnaA [Pseudomonas canavaninivorans]	29.67	7.08647e+07	2.27558e+08	3.21116
MBJ2347247.1	TldD/PmbA family protein [Pseudomonas canavaninivorans]	10.83	4.64593e+06	1.45533e+07	3.13248
MBJ2347011.1	ethanolamine ammonia-lyase subunit EutB [Pseudomonas canavaninivorans]	9.27	3.74183e+06	1.16268e+07	3.10725
MBJ2345757.1	isocitrate lyase [Pseudomonas canavaninivorans]	32.43	2.49707e+07	7.11848e+07	2.85073
MBJ2347013.1	aldehyde dehydrogenase [Pseudomonas canavaninivorans]	65.22	2.93762e+08	8.32409e+08	2.83362
MBJ2348836.1	carbohydrate porin [Pseudomonas canavaninivorans]	18.3	9.40791e+06	2.66194e+07	2.82947
MBJ2345916.1	F0F1 ATP synthase subunit C [Pseudomonas canavaninivorans]	21.18	1.3726e+08	3.77076e+08	2.74717
MBJ2345742.1	NADH-quinone oxidoreductase subunit NuoN [Pseudomonas canavaninivorans]	3.9	3.37047e+07	9.20047e+07	2.72973
MBJ2348969.1	fatty acid oxidation complex subunit alpha FadB [Pseudomonas canavaninivorans]	52.59	6.2789e+07	1.69225e+08	2.69514
MBJ2348774.1	ABC transporter permease [Pseudomonas canavaninivorans]	8.05	2.16123e+07	5.71958e+07	2.64644
MBJ2345680.1	hypothetical protein JFQ02_02560 [Pseudomonas canavaninivorans]	45.19	1.55651e+07	4.03189e+07	2.59034
MBJ2347908.1	ABC transporter substrate-binding protein [Pseudomonas canavaninivorans]	44.18	9.60118e+07	2.37522e+08	2.47389
MBJ2346520.1	aldehyde dehydrogenase [Pseudomonas canavaninivorans]	48.62	2.93762e+08	6.94951e+08	2.3657
MBJ2349740.1	L-serine ammonia-lyase [Pseudomonas canavaninivorans]	12.45	6.29704e+06	1.46194e+07	2.32163
MBJ2347542.1	crotonase/enoyl-CoA hydratase family protein [Pseudomonas canavaninivorans]	58.15	7.93245e+07	1.80016e+08	2.26936
MBJ2349725.1	DeoR/GlpR family transcriptional regulator [Pseudomonas canavaninivorans]	10.36	4.56311e+06	1.0192e+07	2.23357
MBJ2347067.1	mandelate racemase/muconate lactonizing enzyme family protein [Pseudomonas canavaninivorans]	7.25	1.28443e+07	2.57061e+07	2.00136
MBJ2349059.1	lipopolysaccharide transport periplasmic protein LptA [Pseudomonas canavaninivorans]	15.93	3.44045e+07	6.81425e+07	1.98063
MBJ2349418.1	OprD family porin [Pseudomonas canavaninivorans]	78.42	2.28459e+09	4.52363e+09	1.98006
MBJ2348776.1	transporter substrate-binding domain-containing protein [Pseudomonas canavaninivorans]	43.46	9.72102e+06	1.88436e+07	1.93844
MBJ2345917.1	F0F1 ATP synthase subunit B [Pseudomonas canavaninivorans]	64.74	1.24823e+08	2.40156e+08	1.92398
MBJ2349606.1	dihydrolipoyl dehydrogenase [Pseudomonas canavaninivorans]	25.22	6.6455e+06	1.27807e+07	1.92321
MBJ2346046.1	glycine zipper 2TM domain-containing protein [Pseudomonas canavaninivorans]	60.38	6.0603e+08	1.15569e+09	1.90699
MBJ2346323.1	UDP-3-O-(3-hydroxymyristoyl)glucosamine N-acyltransferase [Pseudomonas canavaninivorans]	33.62	2.76499e+07	5.18637e+07	1.87573
MBJ2350241.1	peptidase [Pseudomonas canavaninivorans]	57.72	88153277	1.6494e+08	1.87106
MBJ2345922.1	F0F1 ATP synthase subunit epsilon [Pseudomonas canavaninivorans]	31.21	7.11698e+06	1.33131e+07	1.87061
MBJ2347904.1	ABC transporter ATP-binding protein [Pseudomonas canavaninivorans]	47.9	2.58874e+07	4.81887e+07	1.86148
MBJ2348539.1	AlgP family protein [Pseudomonas canavaninivorans]	23.34	5.61622e+08	1.0431e+09	1.8573
MBJ2349741.1	glycine cleavage system aminomethyltransferase GcvT [Pseudomonas canavaninivorans]	41.44	1.73859e+07	3.19367e+07	1.83693
MBJ2349948.1	NAD(P)/FAD-dependent oxidoreductase [Pseudomonas canavaninivorans]	22.92	1.59e+07	2.91763e+07	1.83499
MBJ2346735.1	amino acid ABC transporter substrate-binding protein [Pseudomonas canavaninivorans]	61.52	6.93004e+08	1.26911e+09	1.83131
MBJ2346125.1	NAD(P)/FAD-dependent oxidoreductase [Pseudomonas canavaninivorans]	21.95	9.38269e+06	1.70567e+07	1.81789
MBJ2349739.1	aminomethyl-transferring glycine dehydrogenase [Pseudomonas canavaninivorans]	48.26	5.60831e+07	9.49562e+07	1.69313
MBJ2347091.1	iron-siderophore ABC transporter substrate-binding protein [Pseudomonas canavaninivorans]	19.21	6.39724e+06	1.04386e+07	1.63174
MBJ2347558.1	TolC family outer membrane protein [Pseudomonas canavaninivorans]	46.33	6.03171e+07	9.70812e+07	1.60951
MBJ2345488.1	cytosine deaminase [Pseudomonas canavaninivorans]	20	1.51646e+07	2.43759e+07	1.60742
MBJ2349032.1	sulfate transporter CysZ [Pseudomonas canavaninivorans]	12.35	3.24862e+07	5.20147e+07	1.60113
MBJ2346265.1	methyl-accepting chemotaxis protein [Pseudomonas canavaninivorans]	30.93	3.62199e+07	5.78209e+07	1.59638
MBJ2349727.1	glutamate/aspartate ABC transporter substrate-binding protein [Pseudomonas canavaninivorans]	60.2	9.35138e+07	1.46439e+08	1.56597
MBJ2345905.1	50S ribosomal protein L34 [Pseudomonas canavaninivorans]	20.45	2.05664e+08	3.11994e+08	1.51701
MBJ2349861.1	magnesium transporter [Pseudomonas canavaninivorans]	14.17	4.36657e+06	6.54922e+06	1.49986
MBJ2348616.1	GDP-mannose 4,6-dehydratase [Pseudomonas canavaninivorans]	52.52	5.5809e+07	8.36927e+07	1.49963
MBJ2348384.1	methyl-accepting chemotaxis protein [Pseudomonas canavaninivorans]	5.23	1.05834e+08	1.56661e+08	1.48025
MBJ2350320.1	YebC/PmpR family DNA-binding transcriptional regulator [Pseudomonas canavaninivorans]	21.79	2.26129e+07	3.25211e+07	1.43817
MBJ2347341.1	TetR/AcrR family transcriptional regulator [Pseudomonas canavaninivorans]	19.73	7.85522e+06	1.12279e+07	1.42936
MBJ2348441.1	ABC transporter ATP-binding protein [Pseudomonas canavaninivorans]	6.72	2.31958e+07	3.1938e+07	1.37689
MBJ2348103.1	outer membrane lipoprotei OprI [Pseudomonas canavaninivorans]	25.3	1.01083e+08	1.36173e+08	1.34714
MBJ2347741.1	LemA family protein [Pseudomonas canavaninivorans]	30.69	4.55519e+06	6.08997e+06	1.33693
MBJ2346798.1	glutathione S-transferase N-terminal domain-containing protein [Pseudomonas canavaninivorans]	25.37	1.21295e+07	1.61656e+07	1.33276
MBJ2348317.1	3-oxoacyl-ACP reductase FabG [Pseudomonas canavaninivorans]	21.9	1.64691e+07	2.1894e+07	1.3294
MBJ2347476.1	sodium/proton antiporter NhaB [Pseudomonas canavaninivorans]	15.2	6.38125e+07	8.37486e+07	1.31242
MBJ2350402.1	type II 3-dehydroquinate dehydratase [Pseudomonas canavaninivorans]	44.52	1.54995e+07	2.025e+07	1.30649
MBJ2345749.1	NADH-quinone oxidoreductase subunit NuoG [Pseudomonas canavaninivorans]	50	7.737e+07	101049502	1.30606
MBJ2345611.1	DUF2628 domain-containing protein [Pseudomonas canavaninivorans]	16.2	2.47432e+07	3.19054e+07	1.28946
MBJ2346752.1	alginate export family protein [Pseudomonas canavaninivorans]	8.7	5.49216e+06	7.02884e+06	1.27979
MBJ2345744.1	NADH-quinone oxidoreductase subunit L [Pseudomonas canavaninivorans]	6.48	8.89124e+07	1.12665e+08	1.26715
MBJ2346144.1	M48 family metallopeptidase [Pseudomonas canavaninivorans]	60.89	4.45707e+07	5.5723e+07	1.25022
MBJ2348316.1	beta-ketoacyl-ACP synthase [Pseudomonas canavaninivorans]	11.03	8410427	1.0514e+07	1.25011
MBJ2349524.1	GNAT family N-acetyltransferase [Pseudomonas canavaninivorans]	18.13	4.75983e+06	5.94592e+06	1.24919
MBJ2348619.1	glycosyltransferase [Pseudomonas canavaninivorans]	8.98	15978809	1.98946e+07	1.24506
MBJ2348861.1	MarR family transcriptional regulator [Pseudomonas canavaninivorans]	31.25	1.74143e+07	2.15562e+07	1.23784
MBJ2346758.1	alginate O-acetyltransferase AlgF [Pseudomonas canavaninivorans]	14.48	2.16017e+07	2.6515e+07	1.22745
MBJ2349112.1	type III PLP-dependent enzyme [Pseudomonas canavaninivorans]	70.03	8.76922e+07	1.07003e+08	1.22021
MBJ2349899.1	outer membrane protein transport protein [Pseudomonas canavaninivorans]	40.09	2.95157e+08	3.5948e+08	1.21792
MBJ2346150.1	DUF1302 domain-containing protein [Pseudomonas canavaninivorans]	39.94	1.09758e+08	1.33481e+08	1.21613
MBJ2346042.1	protein kinase [Pseudomonas canavaninivorans]	12.4	1.03779e+07	1.25958e+07	1.21371
MBJ2346923.1	MFS transporter [Pseudomonas canavaninivorans]	6.24	2.08459e+07	2.50484e+07	1.2016
MBJ2345828.1	DUF4041 domain-containing protein [Pseudomonas canavaninivorans]	15.49	1.94339e+07	2.31582e+07	1.19164
MBJ2345805.1	cytochrome c oxidase subunit II [Pseudomonas canavaninivorans]	25.87	4.99125e+07	5.87793e+07	1.17765
MBJ2345967.1	Tim44 domain-containing protein [Pseudomonas canavaninivorans]	43.1	4.52586e+07	5.29186e+07	1.16925
MBJ2346212.1	flavodoxin-dependent (E)-4-hydroxy-3-methylbut-2-enyl-diphosphate synthase [Pseudomonas canavaninivorans]	53.66	9.97176e+07	1.15355e+08	1.15681
MBJ2348706.1	molecular chaperone DnaK [Pseudomonas canavaninivorans]	56.58	1.7996e+08	2.07254e+08	1.15166
MBJ2345510.1	Hsp20 family protein [Pseudomonas canavaninivorans]	62	1.40009e+07	1.60983e+07	1.14981
MBJ2347320.1	YggT family protein [Pseudomonas canavaninivorans]	32.65	7.03113e+07	8.03137e+07	1.14226
MBJ2348533.1	penicillin-binding protein activator LpoB [Pseudomonas canavaninivorans]	17.95	1.73242e+07	1.97767e+07	1.14157
MBJ2349434.1	DNA binding protein [Pseudomonas canavaninivorans]	44	5.90959e+07	6.74446e+07	1.14127
MBJ2345939.1	iron-containing redox enzyme family protein [Pseudomonas canavaninivorans]	71.37	1.06762e+09	1.21648e+09	1.13944
MBJ2348024.1	OmpA family protein [Pseudomonas canavaninivorans]	64.24	1.08349e+09	1.23074e+09	1.1359
MBJ2347729.1	alkene reductase [Pseudomonas canavaninivorans]	47.85	3.42985e+07	3.85722e+07	1.1246
MBJ2346734.1	amino acid ABC transporter permease [Pseudomonas canavaninivorans]	21.88	1.31017e+08	1.47307e+08	1.12433
MBJ2348945.1	LTA synthase family protein [Pseudomonas canavaninivorans]	21.23	1.23725e+07	1.38921e+07	1.12282
MBJ2347747.1	L-threonine dehydrogenase [Pseudomonas canavaninivorans]	12.83	1.23144e+07	1.38254e+07	1.12271
MBJ2348495.1	extracellular solute-binding protein [Pseudomonas canavaninivorans]	55.39	5.08811e+07	5.66078e+07	1.11255
MBJ2350301.1	isovaleryl-CoA dehydrogenase [Pseudomonas canavaninivorans]	12.66	1.40233e+07	1.55908e+07	1.11178
MBJ2349589.1	2-methylcitrate synthase [Pseudomonas canavaninivorans]	50.93	1.28511e+08	1.42785e+08	1.11107
MBJ2347800.1	methyl-accepting chemotaxis protein [Pseudomonas canavaninivorans]	7.9	7.4457e+07	8.20442e+07	1.1019
MBJ2348544.1	uroporphyrinogen-III synthase [Pseudomonas canavaninivorans]	14.44	8.56036e+06	9.37501e+06	1.09516
MBJ2349773.1	porphobilinogen synthase [Pseudomonas canavaninivorans]	39.2	1.89595e+07	2.06384e+07	1.08855
MBJ2349554.1	crotonase/enoyl-CoA hydratase family protein [Pseudomonas canavaninivorans]	70.74	5.52307e+07	5.97587e+07	1.08198
MBJ2348927.1	flagellar motor protein MotD [Pseudomonas canavaninivorans]	17.35	7.21087e+06	7.79392e+06	1.08086
MBJ2346737.1	ATP-dependent RNA helicase RhlB [Pseudomonas canavaninivorans]	21.54	1.5887e+07	1.70159e+07	1.07105
MBJ2345714.1	glycine betaine ABC transporter substrate-binding protein [Pseudomonas canavaninivorans]	18.39	1.23997e+07	1.31787e+07	1.06282
MBJ2347795.1	outer membrane protein assembly factor BamC [Pseudomonas canavaninivorans]	50.13	4.02518e+07	4.26902e+07	1.06058
MBJ2348483.1	amino-acid N-acetyltransferase [Pseudomonas canavaninivorans]	44.44	2.49635e+07	2.64543e+07	1.05972
MBJ2349097.1	OprD family porin [Pseudomonas canavaninivorans]	24.84	4.81859e+07	5.09533e+07	1.05743
MBJ2348894.1	flagellar filament capping protein FliD [Pseudomonas canavaninivorans]	25.21	1.32496e+07	1.40042e+07	1.05695
MBJ2349227.1	FAD-dependent oxidoreductase [Pseudomonas canavaninivorans]	14.11	2.0582e+07	2.16398e+07	1.05139
MBJ2350418.1	sulfate ABC transporter substrate-binding protein [Pseudomonas canavaninivorans]	37.65	3.21805e+07	3.37958e+07	1.05019
MBJ2348244.1	DUF3999 domain-containing protein [Pseudomonas canavaninivorans]	5.48	6.73552e+06	7.06536e+06	1.04897
MBJ2347640.1	phosphoenolpyruvate carboxykinase [Pseudomonas canavaninivorans]	39.3	2.495e+08	2.61686e+08	1.04884
MBJ2346025.1	type VI secretion system ATPase TssH [Pseudomonas canavaninivorans]	57.48	1.37884e+08	1.44054e+08	1.04475
MBJ2346031.1	type VI secretion system tube protein Hcp [Pseudomonas canavaninivorans]	56.79	1.37287e+09	1.42107e+09	1.03511
MBJ2346015.1	HU family DNA-binding protein [Pseudomonas canavaninivorans]	59.34	3.64635e+08	3.76946e+08	1.03376
MBJ2349493.1	multidrug efflux RND transporter permease subunit [Pseudomonas canavaninivorans]	4.86	6.57824e+06	6.7739e+06	1.02974
MBJ2348592.1	bifunctional 2-polyprenyl-6-hydroxyphenol methylase/3-demethylubiquinol 3-O-methyltransferase UbiG [Pseudomonas canavaninivorans]	37.07	2.50966e+07	2.58077e+07	1.02834
MBJ2348294.1	50S ribosomal protein L31 [Pseudomonas canavaninivorans]	52.78	1.41811e+08	1.45243e+08	1.0242
MBJ2349391.1	quinolinate synthase NadA [Pseudomonas canavaninivorans]	23.58	9.32152e+06	9.54613e+06	1.0241
MBJ2345980.1	GNAT family N-acetyltransferase [Pseudomonas canavaninivorans]	64.86	2.80962e+07	2.87565e+07	1.0235
MBJ2346732.1	amino acid ABC transporter ATP-binding protein [Pseudomonas canavaninivorans]	44.49	1.23772e+08	1.25848e+08	1.01677
MBJ2347726.1	efflux RND transporter periplasmic adaptor subunit [Pseudomonas canavaninivorans]	28.31	2.91856e+07	2.96328e+07	1.01532
MBJ2349123.1	NADPH-dependent 2,4-dienoyl-CoA reductase [Pseudomonas canavaninivorans]	5.15	3.42066e+06	3.46871e+06	1.01405
MBJ2348624.1	pseudaminic acid biosynthesis-associated methylase [Pseudomonas canavaninivorans]	75.48	2.83563e+08	2.87164e+08	1.0127
MBJ2345721.1	methyl-accepting chemotaxis protein [Pseudomonas canavaninivorans]	7.11	1.13747e+08	1.15018e+08	1.01117
MBJ2348468.1	aspartate aminotransferase family protein [Pseudomonas canavaninivorans]	36.34	3.63988e+07	3.66806e+07	1.00774
MBJ2345743.1	NADH-quinone oxidoreductase subunit M [Pseudomonas canavaninivorans]	3.14	1.04716e+08	1.05008e+08	1.00279
MBJ2346950.1	bifunctional diaminohydroxyphosphoribosylaminopyrimidine deaminase/5-amino-6-(5-phosphoribosylamino)uracil reductase RibD [Pseudomonas canavaninivorans]	20.95	4.98655e+06	4.99162e+06	1.00102
MBJ2350022.1	NAD(P)(+) transhydrogenase (Re/Si-specific) subunit beta [Pseudomonas canavaninivorans]	19.25	1.58825e+07	1.58901e+07	1.00048
MBJ2346211.1	helix-turn-helix domain-containing protein [Pseudomonas canavaninivorans]	9.4	1.85901e+07	1.84969e+07	0.994988
MBJ2349086.1	5-dehydro-4-deoxyglucarate dehydratase [Pseudomonas canavaninivorans]	23.1	7.94007e+06	7.884e+06	0.992938
MBJ2346784.1	phospho-N-acetylmuramoyl-pentapeptide-transferase [Pseudomonas canavaninivorans]	6.39	5.85825e+07	5.80558e+07	0.99101
MBJ2346613.1	AMP-binding protein [Pseudomonas canavaninivorans]	12.45	1.08745e+07	1.06936e+07	0.98336
MBJ2348617.1	GDP-L-fucose synthase [Pseudomonas canavaninivorans]	25.93	2.73466e+07	2.66702e+07	0.975266
MBJ2348779.1	penicillin acylase family protein [Pseudomonas canavaninivorans]	2.45	7.2261e+06	7.04674e+06	0.975178
MBJ2350556.1	cation acetate symporter [Pseudomonas canavaninivorans]	7.07	5.29294e+07	5.15235e+07	0.973437
MBJ2346055.1	tonB-system energizer ExbB [Pseudomonas canavaninivorans]	14.86	2.2173e+07	2.15759e+07	0.973069
MBJ2349403.1	cell envelope integrity protein TolA [Pseudomonas canavaninivorans]	8.64	9.03018e+06	8.76477e+06	0.970608
MBJ2348687.1	30S ribosomal protein S15 [Pseudomonas canavaninivorans]	49.44	2.84751e+08	2.74025e+08	0.962332
MBJ2349943.1	outer membrane protein assembly factor BamD [Pseudomonas canavaninivorans]	47.93	6.84487e+07	6.58164e+07	0.961543
MBJ2345683.1	threonine--tRNA ligase [Pseudomonas canavaninivorans]	48.28	2.34281e+08	2.24461e+08	0.958083
MBJ2350561.1	DUF808 domain-containing protein [Pseudomonas canavaninivorans]	21.38	3.86067e+07	3.69721e+07	0.95766
MBJ2348297.1	penicillin-binding protein 1A [Pseudomonas canavaninivorans]	13.64	21421257	2.04944e+07	0.956733
MBJ2349680.1	methyl-accepting chemotaxis protein [Pseudomonas canavaninivorans]	16.29	8.28654e+07	7.88627e+07	0.951697
MBJ2348989.1	cytochrome-c oxidase, cbb3-type subunit II [Pseudomonas canavaninivorans]	37.13	8.88117e+07	8.41437e+07	0.94744
MBJ2346899.1	30S ribosomal protein S3 [Pseudomonas canavaninivorans]	66.23	1.47324e+09	1.39425e+09	0.946384
MBJ2348014.1	methyl-accepting chemotaxis protein [Pseudomonas canavaninivorans]	13.68	8.71308e+07	8.23059e+07	0.944625
MBJ2346096.1	methyl-accepting chemotaxis protein [Pseudomonas canavaninivorans]	26.28	7.32654e+07	6.91825e+07	0.944273
MBJ2348283.1	phasin family protein [Pseudomonas canavaninivorans]	33.33	6.23298e+08	5.8664e+08	0.941187
MBJ2345921.1	F0F1 ATP synthase subunit beta [Pseudomonas canavaninivorans]	93.01	9.26728e+08	8.69758e+08	0.938525
MBJ2349089.1	response regulator transcription factor [Pseudomonas canavaninivorans]	16.67	2.10459e+07	1.97505e+07	0.938445
MBJ2348850.1	long-chain-fatty-acid--CoA ligase [Pseudomonas canavaninivorans]	36.48	2.24882e+07	2.10646e+07	0.936696
MBJ2348699.1	YhbY family RNA-binding protein [Pseudomonas canavaninivorans]	17.65	6.40256e+07	59791629	0.93387
MBJ2345498.1	cache domain-containing protein [Pseudomonas canavaninivorans]	26.12	1.23242e+08	1.15018e+08	0.933271
MBJ2347992.1	heptose kinase [Pseudomonas canavaninivorans]	7.79	8.94791e+06	8.27718e+06	0.92504
MBJ2345752.1	NADH-quinone oxidoreductase subunit C/D [Pseudomonas canavaninivorans]	64.98	1.47876e+08	1.36039e+08	0.919953
MBJ2345938.1	ArpA protein [Pseudomonas canavaninivorans]	73.48	2.70788e+09	2.48939e+09	0.919314
MBJ2350018.1	acyl-CoA dehydrogenase [Pseudomonas canavaninivorans]	44.27	3.23489e+07	2.96598e+07	0.916872
MBJ2348338.1	hydrolase [Pseudomonas canavaninivorans]	30.29	1.0104e+07	9.25658e+06	0.916132
MBJ2345548.1	beta family protein [Pseudomonas canavaninivorans]	47.77	7.33164e+07	6.69132e+07	0.912663
MBJ2346888.1	30S ribosomal protein S12 [Pseudomonas canavaninivorans]	44.72	5.83776e+08	5.32478e+08	0.912127
MBJ2348804.1	high-affinity branched-chain amino acid ABC transporter permease LivM [Pseudomonas canavaninivorans]	12.2	8.31245e+07	7.57967e+07	0.911846
MBJ2350622.1	penicillin-binding protein 1B [Pseudomonas canavaninivorans]	22.93	1.99869e+07	1.81977e+07	0.910484
MBJ2348593.1	TRZ/ATZ family hydrolase [Pseudomonas canavaninivorans]	20.32	8.07955e+06	7.33188e+06	0.907461
MBJ2350202.1	3-deoxy-manno-octulosonate cytidylyltransferase [Pseudomonas canavaninivorans]	23.23	2.80771e+07	2.54434e+07	0.906198
MBJ2349669.1	sulfate ABC transporter substrate-binding protein [Pseudomonas canavaninivorans]	14.24	8.67536e+06	7.84248e+06	0.903994
MBJ2346235.1	endopeptidase La [Pseudomonas canavaninivorans]	17.05	1.38627e+07	1.25114e+07	0.902522
MBJ2349542.1	START domain-containing protein [Pseudomonas canavaninivorans]	56.44	1.03773e+08	9.36297e+07	0.902258
MBJ2346151.1	DUF1329 domain-containing protein [Pseudomonas canavaninivorans]	68.5	3.25137e+08	2.93199e+08	0.90177
MBJ2348792.1	OmpA family protein [Pseudomonas canavaninivorans]	11.52	1.9354e+07	1.74219e+07	0.900169
MBJ2346220.1	2-isopropylmalate synthase [Pseudomonas canavaninivorans]	85.87	3.6058e+08	3.23835e+08	0.898096
MBJ2345919.1	F0F1 ATP synthase subunit alpha [Pseudomonas canavaninivorans]	53.5	1.44977e+09	1.30066e+09	0.897147
MBJ2346089.1	alanine racemase [Pseudomonas canavaninivorans]	14.29	1.64401e+07	1.47134e+07	0.894966
MBJ2346283.1	adenylate kinase [Pseudomonas canavaninivorans]	44.19	9.50106e+07	8.48899e+07	0.893478
MBJ2347032.1	lytic murein transglycosylase B [Pseudomonas canavaninivorans]	13.69	9.74465e+06	8.66202e+06	0.8889
MBJ2346805.1	acyl-CoA dehydrogenase family protein [Pseudomonas canavaninivorans]	10.85	8.81425e+06	7.82026e+06	0.887229
MBJ2349514.1	argininosuccinate synthase [Pseudomonas canavaninivorans]	62.72	2.78282e+08	2.46497e+08	0.885783
MBJ2348482.1	OprD family porin [Pseudomonas canavaninivorans]	51.58	1.15055e+09	1.01522e+09	0.882376
MBJ2350337.1	aldehyde dehydrogenase (NADP(+)) [Pseudomonas canavaninivorans]	42.02	6.43186e+07	5.66735e+07	0.881138
MBJ2346968.1	alpha-2-macroglobulin family protein [Pseudomonas canavaninivorans]	31.67	3.02564e+07	2.6652e+07	0.880872
MBJ2348588.1	TenA family transcriptional regulator [Pseudomonas canavaninivorans]	45.69	2.84777e+08	2.50748e+08	0.880505
MBJ2347988.1	glycosyltransferase family 2 protein [Pseudomonas canavaninivorans]	21.26	2.02143e+07	1.77877e+07	0.879953
MBJ2347513.1	PIG-L family deacetylase [Pseudomonas canavaninivorans]	10.63	1.12825e+07	9.92592e+06	0.87976
MBJ2348793.1	pyridoxamine 5'-phosphate oxidase [Pseudomonas canavaninivorans]	33.49	2.34853e+07	2.05999e+07	0.877139
MBJ2349260.1	thioesterase family protein [Pseudomonas canavaninivorans]	20.75	1.2403e+07	1.08661e+07	0.876086
MBJ2347843.1	ATP-dependent RNA helicase HrpA [Pseudomonas canavaninivorans]	9.13	8.2836e+06	7.24942e+06	0.875153
MBJ2347834.1	VWA domain-containing protein [Pseudomonas canavaninivorans]	16.84	1.08218e+07	9.44248e+06	0.872539
MBJ2347285.1	adenosylmethionine--8-amino-7-oxononanoate transaminase [Pseudomonas canavaninivorans]	9.83	3.56796e+07	3.10237e+07	0.869508
MBJ2346316.1	ribosome recycling factor [Pseudomonas canavaninivorans]	53.51	6.74513e+07	5.85216e+07	0.867613
MBJ2345747.1	NADH-quinone oxidoreductase subunit NuoI [Pseudomonas canavaninivorans]	33.52	5.73497e+07	4.95349e+07	0.863735
MBJ2346039.1	type VI secretion system membrane subunit TssM [Pseudomonas canavaninivorans]	45.63	6.1593e+07	5.28316e+07	0.857753
MBJ2348466.1	polyamine ABC transporter substrate-binding protein [Pseudomonas canavaninivorans]	26.03	4.09882e+07	3.51377e+07	0.857264
MBJ2349098.1	ABC transporter substrate-binding protein [Pseudomonas canavaninivorans]	6.4	18787084	1.60909e+07	0.856488
MBJ2346952.1	bifunctional 3,4-dihydroxy-2-butanone-4-phosphate synthase/GTP cyclohydrolase II [Pseudomonas canavaninivorans]	33.61	3.09088e+07	2.64389e+07	0.855384
MBJ2346611.1	acetyl-CoA C-acyltransferase [Pseudomonas canavaninivorans]	29.11	3.31123e+07	2.83167e+07	0.855171
MBJ2350401.1	tRNA (uridine(54)-C5)-methyltransferase TrmA [Pseudomonas canavaninivorans]	18.66	1.74014e+07	1.4841e+07	0.852861
MBJ2349670.1	sulfate ABC transporter permease subunit CysT [Pseudomonas canavaninivorans]	8.09	3.11146e+07	2.65031e+07	0.85179
MBJ2348344.1	mechanosensitive channel MscK [Pseudomonas canavaninivorans]	9.82	1.38637e+07	1.17885e+07	0.850316
MBJ2346939.1	NAD-dependent epimerase/dehydratase family protein [Pseudomonas canavaninivorans]	6.15	1.34831e+07	1.14309e+07	0.847794
MBJ2349516.1	dihydroorotase [Pseudomonas canavaninivorans]	42.82	3.59067e+07	3.03065e+07	0.844033
MBJ2350490.1	peroxiredoxin [Pseudomonas canavaninivorans]	76.47	1.12004e+08	9.43621e+07	0.842491
MBJ2348618.1	mannose-1-phosphate guanylyltransferase/mannose-6-phosphate isomerase [Pseudomonas canavaninivorans]	15.71	1.2505e+07	1.05093e+07	0.840409
MBJ2347149.1	Gfo/Idh/MocA family oxidoreductase [Pseudomonas canavaninivorans]	40.58	7.68426e+07	6.45237e+07	0.839686
MBJ2349867.1	extracellular solute-binding protein [Pseudomonas canavaninivorans]	48.73	7.69351e+07	6.45634e+07	0.839192
MBJ2346324.1	3-hydroxyacyl-ACP dehydratase FabZ [Pseudomonas canavaninivorans]	50	7.55761e+07	6.33874e+07	0.838724
MBJ2347717.1	imidazole glycerol phosphate synthase subunit HisH [Pseudomonas canavaninivorans]	30.19	2.52145e+07	2.11033e+07	0.836952
MBJ2347033.1	septal ring lytic transglycosylase RlpA family protein [Pseudomonas canavaninivorans]	22.87	1.82795e+07	1.52681e+07	0.835255
MBJ2345748.1	NADH-quinone oxidoreductase subunit NuoH [Pseudomonas canavaninivorans]	16.72	9.66461e+07	8.06536e+07	0.834525
MBJ2348803.1	high-affinity branched-chain amino acid ABC transporter ATP-binding protein LivG [Pseudomonas canavaninivorans]	51.37	1.22502e+08	1.01879e+08	0.831655
MBJ2349200.1	LPS-assembly protein LptD [Pseudomonas canavaninivorans]	48.07	7.51965e+07	6.22968e+07	0.828454
MBJ2346298.1	cold-shock protein [Pseudomonas canavaninivorans]	65.22	8.59062e+07	7.10799e+07	0.827413
MBJ2348467.1	polyamine ABC transporter substrate-binding protein [Pseudomonas canavaninivorans]	59.18	1.02993e+08	8.51902e+07	0.827146
MBJ2346722.1	HU family DNA-binding protein [Pseudomonas canavaninivorans]	60.22	6.01536e+07	4.97439e+07	0.826948
MBJ2348308.1	uroporphyrinogen decarboxylase [Pseudomonas canavaninivorans]	22.25	7.73306e+06	6.39474e+06	0.826935
MBJ2346130.1	hypoxanthine-guanine phosphoribosyltransferase [Pseudomonas canavaninivorans]	44.32	2.46391e+07	2.03736e+07	0.82688
MBJ2347445.1	sn-glycerol-3-phosphate ABC transporter ATP-binding protein UgpC [Pseudomonas canavaninivorans]	17.71	1.19188e+07	9.79374e+06	0.821707
MBJ2346321.1	outer membrane protein assembly factor BamA [Pseudomonas canavaninivorans]	42.14	1.01807e+08	8.3106e+07	0.816306
MBJ2346215.1	outer membrane protein assembly factor BamB [Pseudomonas canavaninivorans]	42.3	7.92072e+07	6.46047e+07	0.815642
MBJ2349845.1	ribonucleoside-diphosphate reductase subunit alpha [Pseudomonas canavaninivorans]	61.47	2.13065e+08	1.72977e+08	0.811849
MBJ2348590.1	YciK family oxidoreductase [Pseudomonas canavaninivorans]	38.21	3.38439e+07	2.74731e+07	0.81176
MBJ2345920.1	F0F1 ATP synthase subunit gamma [Pseudomonas canavaninivorans]	69.93	4.01141e+08	325309010	0.810959
MBJ2350500.1	hypothetical protein JFQ02_27035 [Pseudomonas canavaninivorans]	27.93	1.79541e+08	1.45368e+08	0.809669
MBJ2346916.1	30S ribosomal protein S11 [Pseudomonas canavaninivorans]	55.04	1.08123e+09	8.73591e+08	0.807963
MBJ2346333.1	phosphopyruvate hydratase [Pseudomonas canavaninivorans]	50.82	3.24111e+08	2.61083e+08	0.805535
MBJ2349871.1	ABC transporter ATP-binding protein [Pseudomonas canavaninivorans]	18.84	1.85487e+07	1.49287e+07	0.804835
MBJ2349114.1	PepSY domain-containing protein [Pseudomonas canavaninivorans]	3.92	4.80548e+06	3.85692e+06	0.802608
MBJ2346795.1	BON domain-containing protein [Pseudomonas canavaninivorans]	53.65	5.4332e+07	4.35781e+07	0.80207
MBJ2349661.1	NADP-dependent succinate-semialdehyde dehydrogenase [Pseudomonas canavaninivorans]	60.62	9.48803e+07	7.60366e+07	0.801395
MBJ2347585.1	MetQ/NlpA family ABC transporter substrate-binding protein [Pseudomonas canavaninivorans]	34.62	2.34015e+07	1.8736e+07	0.800632
MBJ2345735.1	amidohydrolase [Pseudomonas canavaninivorans]	32.19	1.55455e+07	1.24209e+07	0.799003
MBJ2347342.1	coniferyl aldehyde dehydrogenase [Pseudomonas canavaninivorans]	43.91	7.19856e+07	5.74087e+07	0.797503
MBJ2347830.1	MFS transporter [Pseudomonas canavaninivorans]	6.31	3.19574e+06	2.54561e+06	0.796565
MBJ2347724.1	AdeC/AdeK/OprM family multidrug efflux complex outer membrane factor [Pseudomonas canavaninivorans]	33.81	3.36881e+07	2.67328e+07	0.793538
MBJ2347505.1	alpha/beta hydrolase [Pseudomonas canavaninivorans]	14.87	1.36236e+07	1.07736e+07	0.790806
MBJ2347036.1	lipoyl(octanoyl) transferase LipB [Pseudomonas canavaninivorans]	9.77	2.86255e+07	2.25993e+07	0.789483
MBJ2348672.1	SRPBCC family protein [Pseudomonas canavaninivorans]	34.21	1.29316e+07	1.02042e+07	0.789089
MBJ2349966.1	acetate--CoA ligase [Pseudomonas canavaninivorans]	47.44	8.093e+07	6.38421e+07	0.788856
MBJ2350559.1	serine/threonine protein kinase [Pseudomonas canavaninivorans]	22.92	1.50083e+07	1.18362e+07	0.788646
MBJ2346045.1	SUMF1/EgtB/PvdO family nonheme iron enzyme [Pseudomonas canavaninivorans]	13.97	1.33854e+07	1.05495e+07	0.788136
MBJ2347240.1	choline ABC transporter substrate-binding protein [Pseudomonas canavaninivorans]	31.11	1.92753e+07	1.51385e+07	0.785383
MBJ2347933.1	methyl-accepting chemotaxis protein [Pseudomonas canavaninivorans]	25.62	78676088	6.17339e+07	0.784659
MBJ2349590.1	Fe/S-dependent 2-methylisocitrate dehydratase AcnD [Pseudomonas canavaninivorans]	25.14	2.20197e+07	1.72357e+07	0.782739
MBJ2346064.1	DUF4870 domain-containing protein [Pseudomonas canavaninivorans]	18.85	1.33624e+08	1.04207e+08	0.779857
MBJ2345865.1	thiol:disulfide interchange protein DsbA/DsbL [Pseudomonas canavaninivorans]	14.49	3.44481e+07	2.67484e+07	0.776485
MBJ2346157.1	TRAP transporter small permease [Pseudomonas canavaninivorans]	12.86	4.34815e+07	3.37625e+07	0.77648
MBJ2350230.1	inorganic phosphate transporter [Pseudomonas canavaninivorans]	9.16	2.32667e+07	1.80272e+07	0.774805
MBJ2348703.1	glutamine-hydrolyzing carbamoyl-phosphate synthase small subunit [Pseudomonas canavaninivorans]	30.16	6.98096e+07	5.39882e+07	0.773363
MBJ2346514.1	quinoprotein ethanol dehydrogenase [Pseudomonas canavaninivorans]	37.22	6.12859e+07	4.73316e+07	0.772309
MBJ2350593.1	hotdog fold thioesterase [Pseudomonas canavaninivorans]	55.1	1.28397e+08	9.89888e+07	0.770959
MBJ2348247.1	methyl-accepting chemotaxis protein [Pseudomonas canavaninivorans]	3.97	1.05182e+08	8.09879e+07	0.769982
MBJ2347788.1	DegQ family serine endoprotease [Pseudomonas canavaninivorans]	48.32	8.7418e+07	6.72763e+07	0.769593
MBJ2345910.1	tRNA uridine-5-carboxymethylaminomethyl(34) synthesis enzyme MnmG [Pseudomonas canavaninivorans]	26.27	2.97924e+07	2.2918e+07	0.769255
MBJ2350494.1	DNA binding protein [Pseudomonas canavaninivorans]	57.85	1.67263e+08	1.28573e+08	0.768687
MBJ2346596.1	putative selenate ABC transporter substrate-binding protein [Pseudomonas canavaninivorans]	62.54	6.31864e+07	4.84296e+07	0.766455
MBJ2346399.1	30S ribosomal protein S12 methylthiotransferase RimO [Pseudomonas canavaninivorans]	10.31	1.7008e+07	1.30152e+07	0.765237
MBJ2349240.1	acyl-CoA dehydrogenase C-terminal domain-containing protein [Pseudomonas canavaninivorans]	39.43	1.06375e+08	8.13702e+07	0.76494
MBJ2350451.1	septum site-determining protein MinC [Pseudomonas canavaninivorans]	51.23	2.89423e+07	2.21059e+07	0.763793
MBJ2349518.1	peroxiredoxin [Pseudomonas canavaninivorans]	90	1.14054e+09	8.69618e+08	0.762461
MBJ2348009.1	sodium/proline symporter PutP [Pseudomonas canavaninivorans]	9.92	2.16669e+07	1.65047e+07	0.761746
MBJ2349840.1	hypothetical protein JFQ02_23675 [Pseudomonas canavaninivorans]	53.77	2.46214e+08	1.87526e+08	0.761637
MBJ2346195.1	protein translocase subunit SecF [Pseudomonas canavaninivorans]	27.96	1.00326e+08	7.59254e+07	0.756786
MBJ2345756.1	methyl-accepting chemotaxis protein [Pseudomonas canavaninivorans]	12.03	7.36531e+07	5.57278e+07	0.756624
MBJ2346035.1	type VI secretion system-associated FHA domain protein TagH [Pseudomonas canavaninivorans]	13.17	9.61485e+06	7.27221e+06	0.756351
MBJ2349814.1	phosphoribosylformylglycinamidine cyclo-ligase [Pseudomonas canavaninivorans]	50	5.40971e+07	4.08695e+07	0.755484
MBJ2346733.1	amino acid ABC transporter permease [Pseudomonas canavaninivorans]	12.88	8.60133e+07	6.49705e+07	0.755354
MBJ2349128.1	SurA N-terminal domain-containing protein [Pseudomonas canavaninivorans]	35.96	4.40909e+07	3.32848e+07	0.754913
MBJ2348622.1	polysaccharide biosynthesis protein [Pseudomonas canavaninivorans]	31.93	4.00966e+07	3.02235e+07	0.753767
MBJ2349215.1	30S ribosomal protein S21 [Pseudomonas canavaninivorans]	46.48	4.39641e+08	3.3128e+08	0.753525
MBJ2349401.1	peptidoglycan-associated lipoprotein Pal [Pseudomonas canavaninivorans]	66.06	2.38011e+09	1.78908e+09	0.751679
MBJ2349729.1	ABC transporter permease subunit [Pseudomonas canavaninivorans]	12.11	3.69043e+07	2.76591e+07	0.749483
MBJ2347547.1	thiol peroxidase [Pseudomonas canavaninivorans]	75.3	6.49913e+07	4.86743e+07	0.748935
MBJ2345537.1	hypothetical protein JFQ02_01830 [Pseudomonas canavaninivorans]	25.37	1.43154e+07	1.07184e+07	0.74873
MBJ2346076.1	aldehyde dehydrogenase [Pseudomonas canavaninivorans]	50.3	1.21241e+08	9.06846e+07	0.747973
MBJ2349582.1	bifunctional phosphoserine phosphatase/homoserine phosphotransferase ThrH [Pseudomonas canavaninivorans]	45.37	4.47608e+07	3.34101e+07	0.746413
MBJ2346792.1	penicillin-binding protein activator [Pseudomonas canavaninivorans]	22.89	2.14141e+07	1.59604e+07	0.745325
MBJ2347715.1	OFA family MFS transporter [Pseudomonas canavaninivorans]	24.05	4.05661e+08	3.01698e+08	0.743718
MBJ2346922.1	excinuclease ABC subunit UvrA [Pseudomonas canavaninivorans]	16.1	1.20462e+07	8.95666e+06	0.743528
MBJ2346917.1	30S ribosomal protein S4 [Pseudomonas canavaninivorans]	68.93	9.90844e+08	7.33821e+08	0.740602
MBJ2348802.1	ABC transporter ATP-binding protein [Pseudomonas canavaninivorans]	58.37	1.20017e+08	8.87548e+07	0.73952
MBJ2347314.1	dihydroorotase [Pseudomonas canavaninivorans]	30.5	4.14563e+07	3.06481e+07	0.739287
MBJ2349924.1	CreA family protein [Pseudomonas canavaninivorans]	38.31	2.26266e+07	1.66835e+07	0.737341
MBJ2346024.1	type VI secretion system tip protein VgrG [Pseudomonas canavaninivorans]	26.01	5.57036e+07	4.09872e+07	0.735809
MBJ2346019.1	type VI secretion system tip protein VgrG [Pseudomonas canavaninivorans]	25.35	5.57036e+07	4.09872e+07	0.735809
MBJ2347560.1	HlyD family type I secretion periplasmic adaptor subunit [Pseudomonas canavaninivorans]	20.88	1.02474e+07	7.45043e+06	0.727054
MBJ2345650.1	M20/M25/M40 family metallo-hydrolase [Pseudomonas canavaninivorans]	36.41	7.9309e+07	5.7621e+07	0.726538
MBJ2349920.1	50S ribosomal protein L21 [Pseudomonas canavaninivorans]	69.23	1.20384e+09	8.74285e+08	0.726247
MBJ2348615.1	CatB-related O-acetyltransferase [Pseudomonas canavaninivorans]	17.86	20058864	1.45458e+07	0.725158
MBJ2346668.1	EAL domain-containing protein [Pseudomonas canavaninivorans]	8.65	1.20432e+07	8705924	0.722892
MBJ2348469.1	glutamine synthetase [Pseudomonas canavaninivorans]	14.38	1.9364e+07	1.39927e+07	0.722615
MBJ2347740.1	beta-glucosidase BglX [Pseudomonas canavaninivorans]	34.34	5.0001e+07	3.61019e+07	0.722023
MBJ2346050.1	HDOD domain-containing protein [Pseudomonas canavaninivorans]	15.91	2.13391e+07	1.54026e+07	0.7218
MBJ2347661.1	dTDP-glucose 4,6-dehydratase [Pseudomonas canavaninivorans]	30.83	2.01223e+07	1.45203e+07	0.721603
MBJ2345750.1	NADH-quinone oxidoreductase subunit NuoF [Pseudomonas canavaninivorans]	54.87	1.06773e+08	7.70141e+07	0.721288
MBJ2348789.1	DUF2269 family protein [Pseudomonas canavaninivorans]	16.88	1.37627e+07	9.91858e+06	0.720686
MBJ2350483.1	DUF1883 domain-containing protein [Pseudomonas canavaninivorans]	52	1.71767e+07	1.23026e+07	0.716238
MBJ2347923.1	YgiQ family radical SAM protein [Pseudomonas canavaninivorans]	11.56	1.51664e+07	1.08513e+07	0.715487
MBJ2346400.1	potassium transporter Kup [Pseudomonas canavaninivorans]	9	1.2181e+07	8.7149e+06	0.715452
MBJ2346030.1	hypothetical protein JFQ02_04330 [Pseudomonas canavaninivorans]	58.94	1.06862e+08	7.64366e+07	0.715286
MBJ2346391.1	response regulator transcription factor [Pseudomonas canavaninivorans]	30.41	1.07437e+07	7.68361e+06	0.715172
MBJ2349061.1	RNA polymerase factor sigma-54 [Pseudomonas canavaninivorans]	18.51	2.63885e+07	1.88328e+07	0.713673
MBJ2348238.1	type I glutamate--ammonia ligase [Pseudomonas canavaninivorans]	69.44	4.55018e+08	3.24168e+08	0.712428
MBJ2346129.1	uracil phosphoribosyltransferase [Pseudomonas canavaninivorans]	55.19	6.21052e+07	4.42264e+07	0.712121
MBJ2346803.1	50S ribosomal protein L13 [Pseudomonas canavaninivorans]	67.61	4.97526e+08	3.54252e+08	0.712027
MBJ2347030.1	penicillin-binding protein 2 [Pseudomonas canavaninivorans]	8.87	8.7971e+06	6.26118e+06	0.711733
MBJ2350605.1	3-methyl-2-oxobutanoate hydroxymethyltransferase [Pseudomonas canavaninivorans]	30.08	9.41699e+07	6.6992e+07	0.711395
MBJ2347621.1	cystine ABC transporter substrate-binding protein [Pseudomonas canavaninivorans]	56.77	1.05397e+08	7.49356e+07	0.710983
MBJ2347839.1	aspartyl/asparaginyl beta-hydroxylase domain-containing protein [Pseudomonas canavaninivorans]	43.27	1.0911e+08	7.75069e+07	0.710358
MBJ2345513.1	3-isopropylmalate dehydratase large subunit [Pseudomonas canavaninivorans]	46.82	1.33856e+08	9.50184e+07	0.709854
MBJ2345245.1	ABC transporter substrate-binding protein [Pseudomonas canavaninivorans]	11.93	7.21814e+06	5.11038e+06	0.707991
MBJ2345968.1	DNA helicase II [Pseudomonas canavaninivorans]	18.87	2.5712e+07	1.81784e+07	0.707001
MBJ2347924.1	replicative DNA helicase [Pseudomonas canavaninivorans]	19.35	9.52962e+06	6.73151e+06	0.706377
MBJ2348762.1	hypothetical protein JFQ02_18195 [Pseudomonas canavaninivorans]	9.78	1.46622e+07	1.03372e+07	0.705025
MBJ2348100.1	putative 2-dehydropantoate 2-reductase [Pseudomonas canavaninivorans]	49.84	2.64883e+07	1.86243e+07	0.703114
MBJ2346901.1	50S ribosomal protein L29 [Pseudomonas canavaninivorans]	46.03	1.26266e+08	8.86041e+07	0.701726
MBJ2347777.1	tripartite tricarboxylate transporter substrate binding protein [Pseudomonas canavaninivorans]	33.03	4.36701e+07	3.05492e+07	0.699544
MBJ2350477.1	nitronate monooxygenase [Pseudomonas canavaninivorans]	34.28	7.25652e+07	5.07589e+07	0.699494
MBJ2346608.1	acyl-CoA dehydrogenase family protein [Pseudomonas canavaninivorans]	37.08	6.72143e+07	4.69766e+07	0.698908
MBJ2346032.1	type VI secretion system contractile sheath large subunit [Pseudomonas canavaninivorans]	72.89	3.64424e+08	2.54414e+08	0.698127
MBJ2346108.1	aminoacyl-tRNA hydrolase [Pseudomonas canavaninivorans]	46.39	2.27521e+07	1.58777e+07	0.697856
MBJ2346775.1	UDP-3-O-acyl-N-acetylglucosamine deacetylase [Pseudomonas canavaninivorans]	36.63	7.36026e+07	5.1361e+07	0.697816
MBJ2346346.1	DNA mismatch repair protein MutS [Pseudomonas canavaninivorans]	27.49	2.62862e+07	1.83302e+07	0.697331
MBJ2348597.1	prephenate dehydratase [Pseudomonas canavaninivorans]	30.77	4.01973e+07	2.80019e+07	0.696612
MBJ2347559.1	type I secretion system permease/ATPase [Pseudomonas canavaninivorans]	27.44	2.17126e+07	1.51189e+07	0.696318
MBJ2346563.1	ABC transporter ATP-binding protein [Pseudomonas canavaninivorans]	12.97	1.75626e+07	1.22119e+07	0.695336
MBJ2348955.1	glyceraldehyde-3-phosphate dehydrogenase [Pseudomonas canavaninivorans]	64.07	3.74461e+08	2.59995e+08	0.69432
MBJ2348906.1	STAS domain-containing protein [Pseudomonas canavaninivorans]	41.58	1.85925e+07	1.28862e+07	0.693085
MBJ2349094.1	ABC transporter substrate-binding protein [Pseudomonas canavaninivorans]	26.45	4.62278e+07	3.19655e+07	0.691478
MBJ2348697.1	ATP-dependent zinc metalloprotease FtsH [Pseudomonas canavaninivorans]	31.45	5.36099e+07	3.70558e+07	0.691212
MBJ2349500.1	co-chaperone GroES [Pseudomonas canavaninivorans]	45.36	5.55288e+07	3.83488e+07	0.690611
MBJ2347053.1	glutamate-1-semialdehyde 2,1-aminomutase [Pseudomonas canavaninivorans]	47.31	1.66959e+08	1.15147e+08	0.689676
MBJ2345869.1	DNA polymerase I [Pseudomonas canavaninivorans]	21.04	2.94003e+07	2.02737e+07	0.689576
MBJ2347207.1	PatB family C-S lyase [Pseudomonas canavaninivorans]	27.75	2.6443e+07	1.82308e+07	0.689437
MBJ2346257.1	gamma-aminobutyraldehyde dehydrogenase [Pseudomonas canavaninivorans]	35.02	5.27615e+07	3.63632e+07	0.6892
MBJ2350628.1	ketol-acid reductoisomerase [Pseudomonas canavaninivorans]	72.78	2.1941e+09	1.51011e+09	0.688258
MBJ2346155.1	alkaline phosphatase family protein [Pseudomonas canavaninivorans]	3.94	7.58453e+06	5.21471e+06	0.687546
MBJ2348376.1	3D-(3,5/4)-trihydroxycyclohexane-1,2-dione acylhydrolase (decyclizing) [Pseudomonas canavaninivorans]	32.97	1.69107e+07	1.16208e+07	0.687185
MBJ2350488.1	UTP--glucose-1-phosphate uridylyltransferase GalU [Pseudomonas canavaninivorans]	59.5	1.88318e+08	1.29237e+08	0.686268
MBJ2350132.1	VOC family protein [Pseudomonas canavaninivorans]	14.47	1.54109e+07	1.05737e+07	0.686122
MBJ2349685.1	GntR family transcriptional regulator [Pseudomonas canavaninivorans]	37.17	4.04145e+07	2.77108e+07	0.685665
MBJ2346239.1	signal recognition particle protein [Pseudomonas canavaninivorans]	41.48	5.93679e+07	4.06565e+07	0.684824
MBJ2347058.1	AMP nucleosidase [Pseudomonas canavaninivorans]	50.7	1.20116e+08	8.2203e+07	0.684363
MBJ2347054.1	thiamine phosphate synthase [Pseudomonas canavaninivorans]	30.29	2.29513e+07	1.5695e+07	0.683841
MBJ2348569.1	methyl-accepting chemotaxis protein [Pseudomonas canavaninivorans]	12.16	8.50674e+07	5.80793e+07	0.682744
MBJ2347355.1	dihydroxy-acid dehydratase [Pseudomonas canavaninivorans]	51.71	1.59703e+08	1.08951e+08	0.68221
MBJ2346320.1	RIP metalloprotease RseP [Pseudomonas canavaninivorans]	18.67	1.32917e+07	9.05975e+06	0.68161
MBJ2348370.1	MurR/RpiR family transcriptional regulator [Pseudomonas canavaninivorans]	29.08	3.5983e+07	2.45006e+07	0.680894
MBJ2345906.1	ribonuclease P protein component [Pseudomonas canavaninivorans]	24.81	1.97848e+07	1.34673e+07	0.680687
MBJ2349588.1	methylisocitrate lyase [Pseudomonas canavaninivorans]	34.01	2.24203e+07	1.52364e+07	0.679578
MBJ2348921.1	RNA polymerase sigma factor FliA [Pseudomonas canavaninivorans]	12.96	1.7972e+07	1.22131e+07	0.679562
MBJ2349185.1	lipoprotein-releasing ABC transporter permease subunit [Pseudomonas canavaninivorans]	20.67	1.34106e+07	9.11321e+06	0.679551
MBJ2346119.1	acyloxyacyl hydrolase [Pseudomonas canavaninivorans]	22.09	2.69259e+08	1.82674e+08	0.678432
MBJ2349448.1	acetate--CoA ligase [Pseudomonas canavaninivorans]	55.15	1.77402e+08	1.19899e+08	0.675858
MBJ2349565.1	hypothetical protein JFQ02_22265 [Pseudomonas canavaninivorans]	12.44	1.18862e+07	8.01932e+06	0.674675
MBJ2348291.1	SPOR domain-containing protein [Pseudomonas canavaninivorans]	23.5	1.43538e+07	9.68044e+06	0.674417
MBJ2347905.1	ATP-binding cassette domain-containing protein [Pseudomonas canavaninivorans]	49.31	8.25676e+07	5.56756e+07	0.674304
MBJ2347464.1	methyl-accepting chemotaxis protein [Pseudomonas canavaninivorans]	29.04	1.22153e+08	8.23477e+07	0.674134
MBJ2349425.1	bifunctional glutamate N-acetyltransferase/amino-acid acetyltransferase ArgJ [Pseudomonas canavaninivorans]	45.19	6.8546e+07	4.61427e+07	0.673165
MBJ2347956.1	HAMP domain-containing protein [Pseudomonas canavaninivorans]	8.32	2.24081e+07	1.50794e+07	0.672946
MBJ2346823.1	OmpA family lipoprotein [Pseudomonas canavaninivorans]	40.16	5.20534e+07	3.49411e+07	0.671255
MBJ2345937.1	cation:proton antiporter [Pseudomonas canavaninivorans]	4.09	1.84749e+07	1.23993e+07	0.671141
MBJ2348773.1	succinylglutamate desuccinylase/aspartoacylase family protein [Pseudomonas canavaninivorans]	28.76	1.39958e+07	9.33633e+06	0.667078
MBJ2348580.1	DUF2059 domain-containing protein [Pseudomonas canavaninivorans]	31.79	7.31693e+06	4.87734e+06	0.666583
MBJ2346193.1	preprotein translocase subunit YajC [Pseudomonas canavaninivorans]	42.34	5.25518e+08	3.50297e+08	0.666575
MBJ2347925.1	50S ribosomal protein L9 [Pseudomonas canavaninivorans]	59.46	1.02776e+09	6.84237e+08	0.665756
MBJ2346748.1	UDP-glucose/GDP-mannose dehydrogenase family protein [Pseudomonas canavaninivorans]	8.22	9.73719e+06	6.48229e+06	0.665724
MBJ2349131.1	ATP-dependent Clp protease ATP-binding subunit ClpX [Pseudomonas canavaninivorans]	41.22	8.65967e+07	5.75775e+07	0.664893
MBJ2347435.1	hybrid sensor histidine kinase/response regulator [Pseudomonas canavaninivorans]	9.5	1.51899e+07	1.00666e+07	0.662718
MBJ2349490.1	imelysin [Pseudomonas canavaninivorans]	44.92	3.48006e+07	2.30624e+07	0.662703
MBJ2345776.1	replication-associated recombination protein A [Pseudomonas canavaninivorans]	12.02	7.35952e+06	4.85989e+06	0.660355
MBJ2345198.1	PAS domain S-box protein [Pseudomonas canavaninivorans]	38.96	9.69023e+07	6.3984e+07	0.660294
MBJ2347998.1	pyruvate dehydrogenase (acetyl-transferring), homodimeric type [Pseudomonas canavaninivorans]	53.8	4.09006e+08	270012625	0.660167
MBJ2348768.1	dCTP deaminase [Pseudomonas canavaninivorans]	48.4	1.33735e+08	8.82644e+07	0.659995
MBJ2346385.1	recombinase RecA [Pseudomonas canavaninivorans]	75.43	1.99278e+08	1.3137e+08	0.659231
MBJ2349133.1	trigger factor [Pseudomonas canavaninivorans]	74.54	3.22333e+08	2.12315e+08	0.658681
MBJ2345925.1	glutamine--fructose-6-phosphate transaminase (isomerizing) [Pseudomonas canavaninivorans]	41.64	4.32498e+07	2.84248e+07	0.657225
MBJ2346036.1	type VI secretion system lipoprotein TssJ [Pseudomonas canavaninivorans]	41.07	3.83809e+07	2.51266e+07	0.654664
MBJ2347281.1	DEAD/DEAH box helicase [Pseudomonas canavaninivorans]	33.81	6.97722e+07	4.56272e+07	0.653945
MBJ2347622.1	D-cysteine desulfhydrase [Pseudomonas canavaninivorans]	39.76	3.31872e+07	2.16997e+07	0.653858
MBJ2347268.1	methionine adenosyltransferase [Pseudomonas canavaninivorans]	63.64	9.76984e+08	6.3838e+08	0.653419
MBJ2350623.1	hypothetical protein JFQ02_27670 [Pseudomonas canavaninivorans]	15.9	3.12161e+07	2.03819e+07	0.65293
MBJ2347999.1	dihydrolipoyllysine-residue acetyltransferase [Pseudomonas canavaninivorans]	52.92	3.33041e+08	2.1744e+08	0.652894
MBJ2346197.1	inositol monophosphatase [Pseudomonas canavaninivorans]	30.88	1.23866e+08	8.07912e+07	0.652248
MBJ2345908.1	membrane protein insertase YidC [Pseudomonas canavaninivorans]	32.86	1.38816e+08	9.04893e+07	0.651867
MBJ2347957.1	membrane integrity-associated transporter subunit PqiC [Pseudomonas canavaninivorans]	33.33	5.49952e+07	3.584e+07	0.651693
MBJ2345970.1	transcriptional regulator HexR [Pseudomonas canavaninivorans]	12.5	1.89549e+07	1.23448e+07	0.651274
MBJ2345517.1	aspartate-semialdehyde dehydrogenase [Pseudomonas canavaninivorans]	64.05	2.3199e+08	1.50876e+08	0.650357
MBJ2349499.1	chaperonin GroEL [Pseudomonas canavaninivorans]	66.73	1.76894e+09	1.14999e+09	0.650101
MBJ2347983.1	lipid A export permease/ATP-binding protein MsbA [Pseudomonas canavaninivorans]	31.54	4.00917e+07	2.60236e+07	0.649102
MBJ2345291.1	molecular chaperone HscC [Pseudomonas canavaninivorans]	23.98	1.73802e+07	1.12783e+07	0.648914
MBJ2347046.1	apolipoprotein N-acyltransferase [Pseudomonas canavaninivorans]	20.12	1.79701e+07	1.16589e+07	0.648792
MBJ2347903.1	SDR family oxidoreductase [Pseudomonas canavaninivorans]	60.24	2.3081e+08	1.4964e+08	0.648327
MBJ2346896.1	50S ribosomal protein L2 [Pseudomonas canavaninivorans]	58.39	2.19602e+09	1.4234e+09	0.648171
MBJ2346778.1	cell division protein FtsQ/DivIB [Pseudomonas canavaninivorans]	17.01	1.14169e+07	7.39236e+06	0.647495
MBJ2347015.1	UDP-N-acetylmuramate:L-alanyl-gamma-D-glutamyl-meso-diaminopimelate ligase [Pseudomonas canavaninivorans]	35.41	5.30279e+07	3.42857e+07	0.64656
MBJ2347568.1	efflux RND transporter periplasmic adaptor subunit [Pseudomonas canavaninivorans]	55.04	8.16859e+07	5.2795e+07	0.646317
MBJ2349921.1	50S ribosomal protein L27 [Pseudomonas canavaninivorans]	63.53	7.71533e+08	4.98634e+08	0.646291
MBJ2348612.1	pseudaminic acid synthase [Pseudomonas canavaninivorans]	36.65	4.5095e+07	2.91354e+07	0.646088
MBJ2346208.1	nucleoside-diphosphate kinase [Pseudomonas canavaninivorans]	55.32	1.23815e+09	7.99867e+08	0.646018
MBJ2347442.1	sugar ABC transporter substrate-binding protein [Pseudomonas canavaninivorans]	40.6	3.92947e+07	2.53483e+07	0.645081
MBJ2349728.1	amino acid ABC transporter permease [Pseudomonas canavaninivorans]	28.23	2.17732e+07	1.40345e+07	0.644579
MBJ2350554.1	succinate dehydrogenase, cytochrome b556 subunit [Pseudomonas canavaninivorans]	50	4.10836e+08	2.64678e+08	0.644242
MBJ2346759.1	mannose-1-phosphate guanylyltransferase/mannose-6-phosphate isomerase [Pseudomonas canavaninivorans]	6	1.18171e+07	7.60778e+06	0.643794
MBJ2346898.1	50S ribosomal protein L22 [Pseudomonas canavaninivorans]	48.18	1024044979	6.59009e+08	0.643535
MBJ2349504.1	iron-sulfur cluster carrier protein ApbC [Pseudomonas canavaninivorans]	35.16	3.94138e+07	2.53604e+07	0.643439
MBJ2346051.1	ATP-dependent DNA helicase RecG [Pseudomonas canavaninivorans]	11.87	1.06554e+07	6.85367e+06	0.643213
MBJ2346781.1	undecaprenyldiphospho-muramoylpentapeptide beta-N-acetylglucosaminyltransferase [Pseudomonas canavaninivorans]	40.17	4.64237e+07	2.98577e+07	0.643157
MBJ2348270.1	methyl-accepting chemotaxis protein [Pseudomonas canavaninivorans]	28.68	9.58635e+07	6.15971e+07	0.64255
MBJ2349928.1	isoleucine--tRNA ligase [Pseudomonas canavaninivorans]	58.64	1.7617e+08	1.13054e+08	0.641733
MBJ2350567.1	2-hydroxy-3-oxopropionate reductase [Pseudomonas canavaninivorans]	13.18	1.68413e+07	1.079e+07	0.640689
MBJ2348296.1	malate dehydrogenase [Pseudomonas canavaninivorans]	81.52	573016832	366930073	0.640348
MBJ2348042.1	alpha/beta fold hydrolase [Pseudomonas canavaninivorans]	16.3	3.52636e+07	2.25761e+07	0.64021
MBJ2349535.1	FAD-binding protein [Pseudomonas canavaninivorans]	63.11	5.6743e+08	3.62785e+08	0.639346
MBJ2349969.1	protease SohB [Pseudomonas canavaninivorans]	34.99	4.46702e+07	2.85168e+07	0.638384
MBJ2348634.1	DNA polymerase III subunit gamma/tau [Pseudomonas canavaninivorans]	14.68	1.96684e+07	1.25409e+07	0.637616
MBJ2348966.1	type I DNA topoisomerase [Pseudomonas canavaninivorans]	33.56	6.99171e+07	4.45297e+07	0.636893
MBJ2349533.1	electron transfer flavoprotein-ubiquinone oxidoreductase [Pseudomonas canavaninivorans]	45.85	1.21671e+08	7.74892e+07	0.636874
MBJ2348327.1	aromatic amino acid lyase [Pseudomonas canavaninivorans]	30.93	3.49258e+07	2.22412e+07	0.636815
MBJ2348910.1	flagellar basal body-associated protein FliL [Pseudomonas canavaninivorans]	35.33	2.4446e+07	1.55251e+07	0.635075
MBJ2348060.1	YgdI/YgdR family lipoprotein [Pseudomonas canavaninivorans]	34.25	1.21747e+08	7.72655e+07	0.634639
MBJ2350555.1	citrate (Si)-synthase [Pseudomonas canavaninivorans]	66.2	5.74051e+08	3.64146e+08	0.634344
MBJ2349720.1	ABC transporter ATP-binding protein [Pseudomonas canavaninivorans]	26.9	1.462e+07	9.27377e+06	0.634322
MBJ2346895.1	50S ribosomal protein L23 [Pseudomonas canavaninivorans]	55.56	1.4861e+09	9.39171e+08	0.63197
MBJ2349662.1	4-aminobutyrate--2-oxoglutarate transaminase [Pseudomonas canavaninivorans]	56.24	172296419	1.08876e+08	0.631912
MBJ2350581.1	hypothetical protein JFQ02_27460 [Pseudomonas canavaninivorans]	15.87	3.43364e+07	2.16943e+07	0.631815
MBJ2346072.1	ABC transporter substrate-binding protein [Pseudomonas canavaninivorans]	25.57	3.96443e+07	2.49796e+07	0.630094
MBJ2348959.1	S-methyl-5'-thioinosine phosphorylase [Pseudomonas canavaninivorans]	46.34	4.03584e+07	2.5399e+07	0.629335
MBJ2345653.1	exodeoxyribonuclease III [Pseudomonas canavaninivorans]	12.96	8.23962e+06	5.18505e+06	0.629282
MBJ2345754.1	NADH-quinone oxidoreductase subunit A [Pseudomonas canavaninivorans]	20.44	1.42506e+08	8.95084e+07	0.628103
MBJ2350184.1	beta-ketoacyl-ACP synthase II [Pseudomonas canavaninivorans]	37.92	6.53561e+07	4.10453e+07	0.628026
MBJ2349538.1	OmpA family protein [Pseudomonas canavaninivorans]	32.71	2.0231e+07	1.27012e+07	0.627807
MBJ2348918.1	flagellar biosynthesis protein FlhA [Pseudomonas canavaninivorans]	7.33	7.1148e+06	4.46475e+06	0.62753
MBJ2346325.1	acyl-ACP--UDP-N-acetylglucosamine O-acyltransferase [Pseudomonas canavaninivorans]	15.89	3.51796e+07	2.20471e+07	0.626701
MBJ2346343.1	peptidoglycan DD-metalloendopeptidase family protein [Pseudomonas canavaninivorans]	23.49	1.81811e+07	1.13811e+07	0.625986
MBJ2346780.1	UDP-N-acetylmuramate--L-alanine ligase [Pseudomonas canavaninivorans]	33.54	3.72771e+07	2.33349e+07	0.625985
MBJ2346872.1	dihydroneopterin triphosphate 2'-epimerase [Pseudomonas canavaninivorans]	34.13	5.00997e+07	3.1314e+07	0.625034
MBJ2348311.1	DUF2846 domain-containing protein [Pseudomonas canavaninivorans]	27.21	7.4932e+07	4.67174e+07	0.623464
MBJ2345684.1	translation initiation factor IF-3 [Pseudomonas canavaninivorans]	56.28	2.81981e+08	1.75742e+08	0.623241
MBJ2346122.1	deoxyribodipyrimidine photo-lyase [Pseudomonas canavaninivorans]	2.94	6.29412e+06	3.91641e+06	0.622232
MBJ2345778.1	serine--tRNA ligase [Pseudomonas canavaninivorans]	46.71	8.60829e+07	5.35555e+07	0.622138
MBJ2347981.1	PIG-L family deacetylase [Pseudomonas canavaninivorans]	11.95	2.31513e+07	1.43944e+07	0.621754
MBJ2349419.1	mechanosensitive ion channel family protein [Pseudomonas canavaninivorans]	38.93	7.01389e+07	4.3599e+07	0.62161
MBJ2348982.1	methyl-accepting chemotaxis protein [Pseudomonas canavaninivorans]	23.61	1.00267e+08	6.219e+07	0.620244
MBJ2347939.1	RNA chaperone Hfq [Pseudomonas canavaninivorans]	77.91	1.17246e+09	7.24791e+08	0.618179
MBJ2349038.1	phosphate acetyltransferase [Pseudomonas canavaninivorans]	11.16	1.57843e+07	9.7508e+06	0.617752
MBJ2346808.1	tryptophan--tRNA ligase [Pseudomonas canavaninivorans]	35.48	3.34098e+07	2.05987e+07	0.616548
MBJ2346920.1	catalase [Pseudomonas canavaninivorans]	28.42	5.72651e+07	3.52857e+07	0.616182
MBJ2349730.1	amino acid ABC transporter ATP-binding protein [Pseudomonas canavaninivorans]	18.44	2.48865e+07	1.53199e+07	0.615591
MBJ2347075.1	DEAD/DEAH box helicase [Pseudomonas canavaninivorans]	17.08	5.71534e+07	3.51586e+07	0.615161
MBJ2347842.1	bifunctional isocitrate dehydrogenase kinase/phosphatase [Pseudomonas canavaninivorans]	24.96	6.3331e+07	3.89177e+07	0.614512
MBJ2347667.1	OprD family porin [Pseudomonas canavaninivorans]	49.3	1.85127e+08	1.13702e+08	0.614184
MBJ2346609.1	enoyl-CoA hydratase [Pseudomonas canavaninivorans]	60.7	7.99537e+07	4.90273e+07	0.613196
MBJ2345549.1	hypothetical protein JFQ02_01890 [Pseudomonas canavaninivorans]	15.83	4.68102e+07	2.86909e+07	0.612919
MBJ2346194.1	protein translocase subunit SecD [Pseudomonas canavaninivorans]	36.33	1.83976e+08	1.1274e+08	0.612798
MBJ2348722.1	tyrosine-type recombinase/integrase [Pseudomonas canavaninivorans]	4.78	9.22609e+06	5.6497e+06	0.61236
MBJ2349261.1	CHAD domain-containing protein [Pseudomonas canavaninivorans]	14.62	1.02458e+07	6.26201e+06	0.611176
MBJ2346384.1	CinA family protein [Pseudomonas canavaninivorans]	41.57	2.47204e+07	1.51003e+07	0.610844
MBJ2346913.1	preprotein translocase subunit SecY [Pseudomonas canavaninivorans]	28.73	8.05349e+08	4.91801e+08	0.610668
MBJ2350364.1	transporter substrate-binding domain-containing protein [Pseudomonas canavaninivorans]	57.03	5.59256e+07	3.41506e+07	0.610643
MBJ2350177.1	TetR/AcrR family transcriptional regulator [Pseudomonas canavaninivorans]	25.47	3.96501e+07	2.41668e+07	0.609502
MBJ2347713.1	AsmA family protein [Pseudomonas canavaninivorans]	15.25	2.72795e+07	1.6618e+07	0.609176
MBJ2349886.1	catalase family protein [Pseudomonas canavaninivorans]	21.43	2.99665e+07	1.8251e+07	0.609045
MBJ2349967.1	nitrite/sulfite reductase [Pseudomonas canavaninivorans]	55.8	1.48053e+08	9.00058e+07	0.607929
MBJ2346100.1	hypothetical protein JFQ02_04685 [Pseudomonas canavaninivorans]	19.49	8.09263e+07	4.91906e+07	0.607844
MBJ2346691.1	formate-dependent phosphoribosylglycinamide formyltransferase [Pseudomonas canavaninivorans]	44.27	1.84119e+08	1.11796e+08	0.607194
MBJ2346241.1	ribosome maturation factor RimM [Pseudomonas canavaninivorans]	38.76	2.93121e+07	1.7791e+07	0.60695
MBJ2349137.1	peptidase C39 family protein [Pseudomonas canavaninivorans]	12.89	2.30771e+07	1.40039e+07	0.606831
MBJ2348690.1	translation initiation factor IF-2 [Pseudomonas canavaninivorans]	61.74	3.66554e+08	2.21863e+08	0.605267
MBJ2345596.1	hypothetical protein JFQ02_02130 [Pseudomonas canavaninivorans]	15.91	2.46352e+07	1.4897e+07	0.604705
MBJ2349640.1	YdgA family protein [Pseudomonas canavaninivorans]	71.66	2.74664e+08	1.66002e+08	0.604382
MBJ2346339.1	2-C-methyl-D-erythritol 2,4-cyclodiphosphate synthase [Pseudomonas canavaninivorans]	35.03	2.54795e+07	1.53967e+07	0.604276
MBJ2350182.1	endolytic transglycosylase MltG [Pseudomonas canavaninivorans]	15.03	1.3906e+07	8.4007e+06	0.604106
MBJ2349802.1	acetyl-CoA C-acetyltransferase [Pseudomonas canavaninivorans]	29.01	2.82695e+07	1.70736e+07	0.603958
MBJ2348806.1	branched-chain amino acid ABC transporter substrate-binding protein [Pseudomonas canavaninivorans]	73.87	1.34387e+09	8.10702e+08	0.603259
MBJ2349919.1	polyprenyl synthetase family protein [Pseudomonas canavaninivorans]	41.3	3.35791e+07	2.02326e+07	0.602536
MBJ2349132.1	ATP-dependent Clp endopeptidase proteolytic subunit ClpP [Pseudomonas canavaninivorans]	27.01	1.6518e+08	9.95253e+07	0.602527
MBJ2349426.1	preprotein translocase subunit SecA [Pseudomonas canavaninivorans]	51.81	1.09376e+08	6.58721e+07	0.602252
MBJ2349915.1	TIGR00645 family protein [Pseudomonas canavaninivorans]	17.28	2.79768e+07	1.68371e+07	0.601823
MBJ2348069.1	deoxyguanosinetriphosphate triphosphohydrolase [Pseudomonas canavaninivorans]	27.15	3.33152e+07	2.00279e+07	0.601165
MBJ2346725.1	glutathione S-transferase family protein [Pseudomonas canavaninivorans]	15.43	1.81009e+07	1.08797e+07	0.601058
MBJ2347806.1	5-carboxymethyl-2-hydroxymuconate Delta-isomerase [Pseudomonas canavaninivorans]	38.84	1.93145e+08	1.16041e+08	0.600798
MBJ2350539.1	dienelactone hydrolase family protein [Pseudomonas canavaninivorans]	19.01	2.36498e+07	1.42065e+07	0.600705
MBJ2350560.1	VacJ family lipoprotein [Pseudomonas canavaninivorans]	18.7	8.18413e+06	4.91124e+06	0.600093
MBJ2348892.1	flagellin FliC [Pseudomonas canavaninivorans]	42.91	4.74959e+08	2.83922e+08	0.597782
MBJ2348444.1	ABC transporter substrate-binding protein [Pseudomonas canavaninivorans]	9.08	9.29255e+06	5.54818e+06	0.597056
MBJ2347037.1	lipoyl synthase [Pseudomonas canavaninivorans]	19.58	47036918	2.80697e+07	0.596758
MBJ2348613.1	hypothetical protein JFQ02_17405 [Pseudomonas canavaninivorans]	29.83	3.51257e+07	2.09457e+07	0.596307
MBJ2346736.1	alpha/beta fold hydrolase [Pseudomonas canavaninivorans]	43.58	7.56339e+07	4.50493e+07	0.595624
MBJ2349095.1	ABC transporter substrate-binding protein [Pseudomonas canavaninivorans]	47.13	1.84869e+08	1.10107e+08	0.595597
MBJ2349428.1	DUF853 family protein [Pseudomonas canavaninivorans]	10.3	9.8807e+06	5.88011e+06	0.595111
MBJ2346607.1	enoyl-CoA hydratase/isomerase family protein [Pseudomonas canavaninivorans]	59.78	1.12309e+08	6.66212e+07	0.593197
MBJ2347725.1	efflux RND transporter permease subunit EmhB [Pseudomonas canavaninivorans]	12.62	3.59588e+07	2.12853e+07	0.591936
MBJ2349763.1	ABC transporter substrate-binding protein [Pseudomonas canavaninivorans]	67.57	2.3858e+08	1.411e+08	0.591414
MBJ2346894.1	50S ribosomal protein L4 [Pseudomonas canavaninivorans]	46	1.84271e+09	1.08849e+09	0.590704
MBJ2349816.1	DUF3108 domain-containing protein [Pseudomonas canavaninivorans]	44.3	8.85202e+07	5.22795e+07	0.590594
MBJ2349077.1	Asp-tRNA(Asn)/Glu-tRNA(Gln) amidotransferase subunit GatA [Pseudomonas canavaninivorans]	42.65	1.09736e+08	6.4805e+07	0.590554
MBJ2346068.1	phosphomannomutase/phosphoglucomutase [Pseudomonas canavaninivorans]	52.9	1.08754e+08	6.40738e+07	0.589163
MBJ2348447.1	hydroxyacylglutathione hydrolase [Pseudomonas canavaninivorans]	41.96	2.14403e+07	1.25952e+07	0.587454
MBJ2345505.1	glutamate--tRNA ligase [Pseudomonas canavaninivorans]	49.7	7.26662e+07	4.26804e+07	0.58735
MBJ2349682.1	non-ribosomal peptide synthetase [Pseudomonas canavaninivorans]	2.99	7.23754e+06	4.24989e+06	0.5872
MBJ2346650.1	dipeptidase [Pseudomonas canavaninivorans]	42.66	1.0726e+08	6.28018e+07	0.585508
MBJ2349056.1	KpsF/GutQ family sugar-phosphate isomerase [Pseudomonas canavaninivorans]	45.37	5.35849e+07	3.13565e+07	0.585174
MBJ2347838.1	cysteine synthase A [Pseudomonas canavaninivorans]	68.83	3.29727e+08	1.92607e+08	0.584142
MBJ2346074.1	50S ribosomal protein L33 [Pseudomonas canavaninivorans]	47.06	1.7807e+08	1.03969e+08	0.583866
MBJ2348031.1	phosphoenolpyruvate synthase [Pseudomonas canavaninivorans]	56.51	2.75846e+08	1.60528e+08	0.581946
MBJ2350240.1	EAL domain-containing protein [Pseudomonas canavaninivorans]	12.74	12047516	7.00709e+06	0.581621
MBJ2346234.1	protease inhibitor I42 family protein [Pseudomonas canavaninivorans]	16.92	1.66585e+07	9.68498e+06	0.581383
MBJ2345853.1	spore maturation protein [Pseudomonas canavaninivorans]	4.65	1.80155e+07	1.04729e+07	0.581326
MBJ2350351.1	MoxR family ATPase [Pseudomonas canavaninivorans]	5.96	16661558	9.67413e+06	0.580626
MBJ2348305.1	AAA family ATPase [Pseudomonas canavaninivorans]	23.05	7.66427e+07	4.4497e+07	0.580576
MBJ2346904.1	50S ribosomal protein L24 [Pseudomonas canavaninivorans]	57.69	1.91456e+09	1.11037e+09	0.57996
MBJ2345319.1	nucleotidyltransferase domain-containing protein [Pseudomonas canavaninivorans]	10.31	1.97484e+07	1.14516e+07	0.579874
MBJ2347264.1	phosphoglycerate kinase [Pseudomonas canavaninivorans]	69.51	8.10905e+07	4.69658e+07	0.579178
MBJ2349719.1	ornithine carbamoyltransferase [Pseudomonas canavaninivorans]	57.52	1.36087e+08	7.87772e+07	0.578876
MBJ2349752.1	LysR family transcriptional regulator [Pseudomonas canavaninivorans]	37.54	1.9743e+07	1.14114e+07	0.578
MBJ2348097.1	HTH-type transcriptional regulator CysB [Pseudomonas canavaninivorans]	58.64	9.97672e+07	5.75558e+07	0.576901
MBJ2348290.1	ATP-dependent protease subunit HslV [Pseudomonas canavaninivorans]	32.39	7.46795e+07	4.30545e+07	0.576524
MBJ2347953.1	phosphatidylserine decarboxylase [Pseudomonas canavaninivorans]	38.46	1.08467e+08	6.25212e+07	0.576407
MBJ2346906.1	30S ribosomal protein S14 [Pseudomonas canavaninivorans]	29.7	1.61826e+09	9.32024e+08	0.57594
MBJ2348278.1	ubiquinone biosynthesis regulatory protein kinase UbiB [Pseudomonas canavaninivorans]	21.72	3.11389e+07	1.79122e+07	0.575236
MBJ2346801.1	ubiquinol-cytochrome c reductase iron-sulfur subunit [Pseudomonas canavaninivorans]	31.98	2.1115e+08	1.21457e+08	0.575217
MBJ2346709.1	pyridoxine 5'-phosphate synthase [Pseudomonas canavaninivorans]	51.01	9.87037e+07	5.67171e+07	0.57462
MBJ2350233.1	RNA polymerase-associated protein RapA [Pseudomonas canavaninivorans]	22.26	32327502	1.85715e+07	0.57448
MBJ2346842.1	D-glycerate dehydrogenase [Pseudomonas canavaninivorans]	63.47	6.9186e+07	3.9732e+07	0.574278
MBJ2347345.1	pantetheine-phosphate adenylyltransferase [Pseudomonas canavaninivorans]	50.94	7.61813e+07	4.369e+07	0.5735
MBJ2348465.1	polyamine ABC transporter ATP-binding protein [Pseudomonas canavaninivorans]	34.74	7.73679e+07	4.43546e+07	0.573294
MBJ2346137.1	hypothetical protein JFQ02_04875 [Pseudomonas canavaninivorans]	59.79	2.10052e+08	1.20228e+08	0.572371
MBJ2348240.1	translational GTPase TypA [Pseudomonas canavaninivorans]	55.12	2.40532e+08	1.37319e+08	0.570899
MBJ2348902.1	flagellar motor switch protein FliG [Pseudomonas canavaninivorans]	22.71	1.14632e+07	6.53435e+06	0.570028
MBJ2346915.1	30S ribosomal protein S13 [Pseudomonas canavaninivorans]	61.02	1.28649e+09	7.33225e+08	0.569944
MBJ2348695.1	phosphoglucosamine mutase [Pseudomonas canavaninivorans]	20.67	1.3293e+08	7.56574e+07	0.56915
MBJ2346158.1	C4-dicarboxylate TRAP substrate-binding protein DctP [Pseudomonas canavaninivorans]	57.4	1.51103e+08	8.6e+07	0.569147
MBJ2349721.1	PhzF family phenazine biosynthesis protein [Pseudomonas canavaninivorans]	25.38	4.34814e+07	2.47283e+07	0.56871
MBJ2347926.1	hypothetical protein JFQ02_13925 [Pseudomonas canavaninivorans]	9.43	2.77683e+07	1.57888e+07	0.568591
MBJ2347996.1	lipopolysaccharide heptosyltransferase II [Pseudomonas canavaninivorans]	21.51	1.95658e+07	1.11141e+07	0.568036
MBJ2346909.1	50S ribosomal protein L18 [Pseudomonas canavaninivorans]	60.34	1.76918e+09	1.00485e+09	0.567977
MBJ2349188.1	Si-specific NAD(P)(+) transhydrogenase [Pseudomonas canavaninivorans]	43.97	2.4208e+08	1.37453e+08	0.567801
MBJ2346196.1	glycine zipper 2TM domain-containing protein [Pseudomonas canavaninivorans]	26.37	2.98301e+07	1.69327e+07	0.567638
MBJ2348093.1	elongation factor P [Pseudomonas canavaninivorans]	29.63	3.72126e+08	2.11199e+08	0.567548
MBJ2345686.1	50S ribosomal protein L20 [Pseudomonas canavaninivorans]	35.59	2.0755e+09	1.17792e+09	0.567538
MBJ2346297.1	glycerol-3-phosphate 1-O-acyltransferase PlsB [Pseudomonas canavaninivorans]	32.05	2.06995e+07	1.17415e+07	0.567236
MBJ2349884.1	FKBP-type peptidyl-prolyl cis-trans isomerase [Pseudomonas canavaninivorans]	54.01	1.77901e+08	1.00907e+08	0.567208
MBJ2345516.1	3-isopropylmalate dehydrogenase [Pseudomonas canavaninivorans]	61.94	1.83801e+08	1.04242e+08	0.567147
MBJ2347958.1	DNA topoisomerase IV subunit A [Pseudomonas canavaninivorans]	39.39	5.81465e+07	3.29276e+07	0.566286
MBJ2348227.1	2,3-bisphosphoglycerate-independent phosphoglycerate mutase [Pseudomonas canavaninivorans]	38.7	9.14931e+07	5.17685e+07	0.565819
MBJ2346910.1	30S ribosomal protein S5 [Pseudomonas canavaninivorans]	66.27	1.73154e+09	9.79695e+08	0.565793
MBJ2348564.1	P-II family nitrogen regulator [Pseudomonas canavaninivorans]	24.11	4.68316e+07	2.64589e+07	0.56498
MBJ2347277.1	acyl-CoA thioesterase [Pseudomonas canavaninivorans]	63.16	6.9447e+07	3.91924e+07	0.56435
MBJ2349411.1	aspartate--tRNA ligase [Pseudomonas canavaninivorans]	52.96	2.71674e+08	1.53274e+08	0.564182
MBJ2347835.1	MoxR family ATPase [Pseudomonas canavaninivorans]	35.94	6.7977e+07	3.83027e+07	0.563465
MBJ2347308.1	glutathione synthase [Pseudomonas canavaninivorans]	32.49	6.55743e+07	3.69485e+07	0.56346
MBJ2346776.1	cell division protein FtsZ [Pseudomonas canavaninivorans]	65.49	1.04247e+08	5.87256e+07	0.563332
MBJ2347266.1	transketolase [Pseudomonas canavaninivorans]	49.02	1.99981e+08	1.12653e+08	0.563316
MBJ2346799.1	cytochrome c1 [Pseudomonas canavaninivorans]	56.92	2.81094e+08	1.58315e+08	0.563209
MBJ2346948.1	YbaY family lipoprotein [Pseudomonas canavaninivorans]	35.71	5.04825e+07	2.84069e+07	0.562709
MBJ2349433.1	formyltetrahydrofolate deformylase [Pseudomonas canavaninivorans]	40.43	7.47348e+07	4.20324e+07	0.562421
MBJ2346908.1	50S ribosomal protein L6 [Pseudomonas canavaninivorans]	75.71	1.3816e+09	7.76317e+08	0.561899
MBJ2347927.1	30S ribosomal protein S18 [Pseudomonas canavaninivorans]	50	1.20782e+09	6.78136e+08	0.561455
MBJ2348233.1	nitrogen regulation protein NR(I) [Pseudomonas canavaninivorans]	24.9	1.38394e+07	7.76918e+06	0.56138
MBJ2347429.1	efflux RND transporter permease subunit [Pseudomonas canavaninivorans]	9.54	2.38994e+07	1.34132e+07	0.561236
MBJ2349818.1	DUF2058 domain-containing protein [Pseudomonas canavaninivorans]	23.46	5.48856e+07	3.07907e+07	0.560998
MBJ2347677.1	AzlC family ABC transporter permease [Pseudomonas canavaninivorans]	17.72	4.06327e+07	2.27938e+07	0.56097
MBJ2347029.1	23S rRNA (pseudouridine(1915)-N(3))-methyltransferase RlmH [Pseudomonas canavaninivorans]	20.65	1.77686e+07	9.96394e+06	0.56076
MBJ2346621.1	nuclear transport factor 2 family protein [Pseudomonas canavaninivorans]	25.79	2.58448e+07	1.44763e+07	0.560126
MBJ2347517.1	NADP-dependent glyceraldehyde-3-phosphate dehydrogenase [Pseudomonas canavaninivorans]	50.09	1.0591e+08	5.9319e+07	0.560089
MBJ2349048.1	ATP phosphoribosyltransferase [Pseudomonas canavaninivorans]	63.51	8.92654e+07	4.99285e+07	0.559326
MBJ2346785.1	UDP-N-acetylmuramoyl-tripeptide--D-alanyl-D-alanine ligase [Pseudomonas canavaninivorans]	31.21	1.73136e+07	9.68154e+06	0.559188
MBJ2347934.1	adenylosuccinate synthase [Pseudomonas canavaninivorans]	64.19	3.1858e+08	1.77868e+08	0.558314
MBJ2348919.1	flagellar biosynthesis protein FlhF [Pseudomonas canavaninivorans]	25.84	1.57994e+07	8.81556e+06	0.557969
MBJ2348347.1	aldo/keto reductase [Pseudomonas canavaninivorans]	77.15	3.53969e+08	1.97456e+08	0.557834
MBJ2348424.1	2-hydroxyacid dehydrogenase [Pseudomonas canavaninivorans]	47.32	2.92502e+07	1.62921e+07	0.556991
MBJ2346073.1	50S ribosomal protein L28 [Pseudomonas canavaninivorans]	57.14	1.44695e+09	8.05841e+08	0.556923
MBJ2345789.1	gamma-glutamyltransferase [Pseudomonas canavaninivorans]	42.43	9.22779e+07	5.13799e+07	0.556796
MBJ2346066.1	orotate phosphoribosyltransferase [Pseudomonas canavaninivorans]	57.48	1.10076e+08	6.12477e+07	0.556415
MBJ2348289.1	ATP-dependent protease ATPase subunit HslU [Pseudomonas canavaninivorans]	38.2	7.11597e+07	3.95545e+07	0.555855
MBJ2346807.1	cell division protein ZapE [Pseudomonas canavaninivorans]	32.69	5.29829e+07	2.94359e+07	0.555574
MBJ2346787.1	penicillin-binding protein 2 [Pseudomonas canavaninivorans]	30.05	2.79175e+07	1.54888e+07	0.554806
MBJ2346840.1	hypothetical protein JFQ02_08425 [Pseudomonas canavaninivorans]	52.78	3.64655e+07	2.0215e+07	0.55436
MBJ2350020.1	Re/Si-specific NAD(P)(+) transhydrogenase subunit alpha [Pseudomonas canavaninivorans]	41.55	7.97624e+07	4.41805e+07	0.553901
MBJ2345766.1	NADP-dependent isocitrate dehydrogenase [Pseudomonas canavaninivorans]	61.48	1.02185e+09	5.64134e+08	0.552071
MBJ2348057.1	molybdopterin molybdotransferase MoeA [Pseudomonas canavaninivorans]	26.77	1.171e+07	6.46105e+06	0.551757
MBJ2346305.1	2,3,4,5-tetrahydropyridine-2,6-dicarboxylate N-succinyltransferase [Pseudomonas canavaninivorans]	62.5	1.79472e+08	9.85249e+07	0.548971
MBJ2349839.1	response regulator [Pseudomonas canavaninivorans]	36.44	2.06693e+07	1.13331e+07	0.548307
MBJ2347620.1	cystine ABC transporter permease [Pseudomonas canavaninivorans]	23.53	2.1922e+07	1.20169e+07	0.548168
MBJ2347997.1	bifunctional [glutamate--ammonia ligase]-adenylyl-L-tyrosine phosphorylase/[glutamate--ammonia-ligase] adenylyltransferase [Pseudomonas canavaninivorans]	31.05	3.24581e+07	1.77859e+07	0.547966
MBJ2348596.1	3-phosphoserine/phosphohydroxythreonine transaminase [Pseudomonas canavaninivorans]	39.89	8.99624e+07	4.92857e+07	0.547847
MBJ2346887.1	DNA-directed RNA polymerase subunit beta' [Pseudomonas canavaninivorans]	67.83	9.43228e+08	5.16422e+08	0.547505
MBJ2346800.1	cytochrome bc complex cytochrome b subunit [Pseudomonas canavaninivorans]	16.63	3.99672e+08	2.1865e+08	0.547074
MBJ2350339.1	lactonase family protein [Pseudomonas canavaninivorans]	25.83	2.28144e+07	1.24607e+07	0.546178
MBJ2348652.1	bifunctional 23S rRNA (guanine(2069)-N(7))-methyltransferase RlmK/23S rRNA (guanine(2445)-N(2))-methyltransferase RlmL [Pseudomonas canavaninivorans]	16.67	2.00776e+07	1.09641e+07	0.546087
MBJ2348693.1	preprotein translocase subunit SecG [Pseudomonas canavaninivorans]	50.39	8.3308e+07	4.54788e+07	0.545912
MBJ2348683.1	carboxylating nicotinate-nucleotide diphosphorylase [Pseudomonas canavaninivorans]	35.46	6.12674e+07	3.34251e+07	0.545561
MBJ2350429.1	chorismate synthase [Pseudomonas canavaninivorans]	22.04	3.71769e+07	2.02653e+07	0.545104
MBJ2348322.1	tryptophan 7-halogenase [Pseudomonas canavaninivorans]	33.41	1.8564e+07	1.01083e+07	0.544511
MBJ2348050.1	MOSC domain-containing protein [Pseudomonas canavaninivorans]	27.51	2.18177e+07	1.18787e+07	0.544453
MBJ2346612.1	SDR family NAD(P)-dependent oxidoreductase [Pseudomonas canavaninivorans]	27.67	9.9791e+06	5.43235e+06	0.544372
MBJ2347847.1	ABC transporter ATP-binding protein [Pseudomonas canavaninivorans]	16.89	2.72716e+07	1.48217e+07	0.543486
MBJ2348920.1	flagellar synthesis regulator FleN [Pseudomonas canavaninivorans]	35.87	5.0992e+07	2.7702e+07	0.543263
MBJ2347333.1	cell division protein FtsX [Pseudomonas canavaninivorans]	23.24	2.05704e+07	1.1158e+07	0.54243
MBJ2350492.1	lactoylglutathione lyase [Pseudomonas canavaninivorans]	56.25	5.31125e+07	2.88083e+07	0.542402
MBJ2346903.1	50S ribosomal protein L14 [Pseudomonas canavaninivorans]	60.66	1.73264e+09	9.38834e+08	0.541851
MBJ2346198.1	tRNA (cytosine(32)/uridine(32)-2'-O)-methyltransferase TrmJ [Pseudomonas canavaninivorans]	31.64	2.49469e+07	1.35162e+07	0.541798
MBJ2346779.1	D-alanine--D-alanine ligase [Pseudomonas canavaninivorans]	11.21	2.19873e+07	1.19039e+07	0.541397
MBJ2346966.1	DUF2138 domain-containing protein [Pseudomonas canavaninivorans]	28.47	4.68604e+07	2.53604e+07	0.541192
MBJ2347579.1	TolC family protein [Pseudomonas canavaninivorans]	59.05	3.16709e+08	1.71337e+08	0.540993
MBJ2346319.1	1-deoxy-D-xylulose-5-phosphate reductoisomerase [Pseudomonas canavaninivorans]	24.24	1.34486e+07	7.27303e+06	0.540802
MBJ2347626.1	L-glyceraldehyde 3-phosphate reductase [Pseudomonas canavaninivorans]	68.12	1.71007e+08	9.23617e+07	0.540106
MBJ2346038.1	DotU family type VI secretion system protein [Pseudomonas canavaninivorans]	31.42	4.6873e+07	2.5297e+07	0.539693
MBJ2350549.1	2-oxoglutarate dehydrogenase complex dihydrolipoyllysine-residue succinyltransferase [Pseudomonas canavaninivorans]	41.77	7.10039e+08	3.82383e+08	0.538538
MBJ2349885.1	hypothetical protein JFQ02_23905 [Pseudomonas canavaninivorans]	34.44	6.05425e+07	3.25548e+07	0.537718
MBJ2348991.1	cytochrome-c oxidase, cbb3-type subunit III [Pseudomonas canavaninivorans]	53.52	3.24131e+08	1.7417e+08	0.537345
MBJ2346280.1	DUF4398 domain-containing protein [Pseudomonas canavaninivorans]	18.98	3.93574e+07	2.1132e+07	0.536925
MBJ2346209.1	23S rRNA (adenine(2503)-C(2))-methyltransferase RlmN [Pseudomonas canavaninivorans]	34.55	3.38915e+07	1.81847e+07	0.536556
MBJ2350235.1	ATPase [Pseudomonas canavaninivorans]	30.82	1.65925e+07	8.89454e+06	0.536058
MBJ2347633.1	RNA-binding transcriptional accessory protein [Pseudomonas canavaninivorans]	20.67	1.10478e+07	5.92115e+06	0.535958
MBJ2347826.1	S9 family peptidase [Pseudomonas canavaninivorans]	17.4	1.64669e+07	8.8234e+06	0.535828
MBJ2349060.1	LPS export ABC transporter ATP-binding protein [Pseudomonas canavaninivorans]	48.13	8.16842e+07	4.37632e+07	0.535761
MBJ2346328.1	DNA polymerase III subunit alpha [Pseudomonas canavaninivorans]	10.14	1.74615e+07	9.34111e+06	0.534954
MBJ2346027.1	type VI secretion system baseplate subunit TssF [Pseudomonas canavaninivorans]	22.13	2.81416e+07	1.50403e+07	0.53445
MBJ2346199.1	serine O-acetyltransferase [Pseudomonas canavaninivorans]	33.33	2.31128e+07	1.23212e+07	0.533087
MBJ2348641.1	chromosome segregation protein SMC [Pseudomonas canavaninivorans]	4.82	5.73436e+06	3.05577e+06	0.532887
MBJ2346711.1	GTPase Era [Pseudomonas canavaninivorans]	17.67	2.50042e+07	1.3319e+07	0.532669
MBJ2348851.1	long-chain fatty acid--CoA ligase [Pseudomonas canavaninivorans]	44.94	9.11399e+07	4.84949e+07	0.532093
MBJ2346322.1	OmpH family outer membrane protein [Pseudomonas canavaninivorans]	25.15	2.7968e+07	1.48635e+07	0.531448
MBJ2349342.1	response regulator [Pseudomonas canavaninivorans]	9.52	1.98667e+07	1.05519e+07	0.531135
MBJ2346034.1	type VI secretion system protein TssA [Pseudomonas canavaninivorans]	35.38	2.18797e+07	1.1617e+07	0.530948
MBJ2345895.1	1-acyl-sn-glycerol-3-phosphate acyltransferase [Pseudomonas canavaninivorans]	30.89	6.38642e+07	3.38933e+07	0.530709
MBJ2348371.1	5-dehydro-2-deoxygluconokinase [Pseudomonas canavaninivorans]	13.02	9.30406e+06	4.93402e+06	0.530309
MBJ2347045.1	YdcF family protein [Pseudomonas canavaninivorans]	8.3	1.10142e+07	5.83209e+06	0.529505
MBJ2346279.1	OmpA family protein [Pseudomonas canavaninivorans]	40.68	1.08092e+08	5.71847e+07	0.52904
MBJ2350060.1	oligopeptidase A [Pseudomonas canavaninivorans]	36.13	7.7964e+07	4.12441e+07	0.529015
MBJ2348704.1	4-hydroxy-tetrahydrodipicolinate reductase [Pseudomonas canavaninivorans]	56.72	1.20223e+08	6.35981e+07	0.528999
MBJ2345859.1	sigma-54-dependent response regulator transcription factor AlgB [Pseudomonas canavaninivorans]	47.77	4.28562e+07	2.26683e+07	0.528939
MBJ2348686.1	polyribonucleotide nucleotidyltransferase [Pseudomonas canavaninivorans]	77.18	7.22993e+08	3.82298e+08	0.528772
MBJ2346240.1	30S ribosomal protein S16 [Pseudomonas canavaninivorans]	51.81	1.36419e+09	7.2117e+08	0.528645
MBJ2347969.1	TolC family outer membrane protein [Pseudomonas canavaninivorans]	29.02	6.70153e+06	3.53951e+06	0.528165
MBJ2347985.1	capsular biosynthesis protein [Pseudomonas canavaninivorans]	7.03	1.49417e+07	7.88233e+06	0.527539
MBJ2345774.1	DNA translocase FtsK 4TM domain-containing protein [Pseudomonas canavaninivorans]	22.32	3.45483e+07	1.82141e+07	0.527207
MBJ2345688.1	phenylalanine--tRNA ligase subunit beta [Pseudomonas canavaninivorans]	46.21	8.82763e+07	4.6515e+07	0.526926
MBJ2348880.1	GNAT family N-acetyltransferase [Pseudomonas canavaninivorans]	48.65	2.69485e+07	1.41998e+07	0.526923
MBJ2349823.1	response regulator [Pseudomonas canavaninivorans]	16.27	1.83469e+07	9.649e+06	0.525921
MBJ2349890.1	MFS transporter [Pseudomonas canavaninivorans]	8.17	1.79025e+07	9.41169e+06	0.52572
MBJ2348388.1	hypothetical protein JFQ02_16275 [Pseudomonas canavaninivorans]	34.9	3.55404e+07	1.86725e+07	0.525388
MBJ2349502.1	HugZ family protein [Pseudomonas canavaninivorans]	22.63	1.66524e+07	8.74265e+06	0.525009
MBJ2347638.1	RNA-binding protein [Pseudomonas canavaninivorans]	22.39	2.59063e+07	1.35975e+07	0.524874
MBJ2347653.1	ADP compounds hydrolase NudE [Pseudomonas canavaninivorans]	22.87	1.10854e+07	5.81647e+06	0.524696
MBJ2345915.1	F0F1 ATP synthase subunit A [Pseudomonas canavaninivorans]	18.34	1.2756e+08	6.6915e+07	0.524578
MBJ2347456.1	ABC-F family ATPase [Pseudomonas canavaninivorans]	16.67	2.46962e+07	1.2949e+07	0.524332
MBJ2348026.1	mechanosensitive ion channel [Pseudomonas canavaninivorans]	34.31	1.81736e+08	9.52147e+07	0.523916
MBJ2348141.1	alpha-D-glucose phosphate-specific phosphoglucomutase [Pseudomonas canavaninivorans]	32.85	5.85043e+07	3.06433e+07	0.523778
MBJ2348931.1	DUF2802 domain-containing protein [Pseudomonas canavaninivorans]	16.79	9.27755e+06	4.85802e+06	0.523631
MBJ2346879.1	elongation factor Tu [Pseudomonas canavaninivorans]	86.15	6.51304e+09	3.41019e+09	0.523594
MBJ2346902.1	30S ribosomal protein S17 [Pseudomonas canavaninivorans]	42.05	1.33934e+09	7.01122e+08	0.523481
MBJ2349134.1	bifunctional methylenetetrahydrofolate dehydrogenase/methenyltetrahydrofolate cyclohydrolase FolD [Pseudomonas canavaninivorans]	36.62	3.56489e+07	1.86577e+07	0.523375
MBJ2350546.1	succinate--CoA ligase subunit alpha [Pseudomonas canavaninivorans]	90.82	1.11067e+09	5.80904e+08	0.52302
MBJ2348705.1	molecular chaperone DnaJ [Pseudomonas canavaninivorans]	40.91	3.58352e+07	1.87332e+07	0.52276
MBJ2345772.1	leucyl/phenylalanyl-tRNA--protein transferase [Pseudomonas canavaninivorans]	14.16	9.20693e+06	4.81297e+06	0.522755
MBJ2349478.1	23S rRNA pseudouridine(2605) synthase RluB [Pseudomonas canavaninivorans]	27.01	3.28124e+07	1.715e+07	0.522667
MBJ2345519.1	FimV family protein [Pseudomonas canavaninivorans]	12.18	2.91284e+07	1.52234e+07	0.522631
MBJ2346883.1	50S ribosomal protein L1 [Pseudomonas canavaninivorans]	76.62	1.39005e+09	7.24275e+08	0.52104
MBJ2349088.1	ABC transporter ATP-binding protein/permease [Pseudomonas canavaninivorans]	37.04	1.19735e+08	6.23134e+07	0.520428
MBJ2347848.1	peptidylprolyl isomerase [Pseudomonas canavaninivorans]	29.41	1.2729e+07	6.62404e+06	0.520389
MBJ2350613.1	pyridoxal phosphate-dependent aminotransferase [Pseudomonas canavaninivorans]	9.49	9.20372e+06	4.77978e+06	0.519332
MBJ2348543.1	heme biosynthesis protein HemY [Pseudomonas canavaninivorans]	29.54	2.63746e+07	1.36924e+07	0.519149
MBJ2347313.1	aspartate carbamoyltransferase catalytic subunit [Pseudomonas canavaninivorans]	62.57	8.75824e+07	4.53986e+07	0.518353
MBJ2350239.1	superoxide dismutase [Fe] [Pseudomonas canavaninivorans]	66.16	5.89862e+08	3.05655e+08	0.518181
MBJ2349127.1	DUF2242 domain-containing protein [Pseudomonas canavaninivorans]	11.23	2.16705e+07	1.11961e+07	0.516651
MBJ2350411.1	acyl-CoA thioesterase II [Pseudomonas canavaninivorans]	28.72	3.49283e+07	1.80225e+07	0.515986
MBJ2346247.1	threonine synthase [Pseudomonas canavaninivorans]	60.34	1.24844e+08	6.43455e+07	0.515408
MBJ2349864.1	M18 family aminopeptidase [Pseudomonas canavaninivorans]	40.33	1.11683e+08	5.75087e+07	0.514928
MBJ2346892.1	30S ribosomal protein S10 [Pseudomonas canavaninivorans]	51.46	1.82562e+09	9.40063e+08	0.514927
MBJ2345603.1	DUF4410 domain-containing protein [Pseudomonas canavaninivorans]	42.54	9.69423e+07	4.98948e+07	0.514686
MBJ2349616.1	DNA alkylation repair protein [Pseudomonas canavaninivorans]	12.3	1.84464e+07	9.4936e+06	0.514658
MBJ2346905.1	50S ribosomal protein L5 [Pseudomonas canavaninivorans]	61.45	1.78149e+09	9.16643e+08	0.514536
MBJ2345560.1	hypothetical protein JFQ02_01945 [Pseudomonas canavaninivorans]	34.17	3.0791e+07	1.58425e+07	0.514517
MBJ2349822.1	cysteine synthase CysM [Pseudomonas canavaninivorans]	69.33	1.0656e+08	5.48253e+07	0.514503
MBJ2348640.1	cell division protein ZipA [Pseudomonas canavaninivorans]	42.35	9.53826e+07	4.90282e+07	0.514016
MBJ2345779.1	uroporphyrinogen-III C-methyltransferase [Pseudomonas canavaninivorans]	29.31	2.41273e+07	1.23947e+07	0.513719
MBJ2347930.1	ribonuclease R [Pseudomonas canavaninivorans]	45.18	9.5565e+07	4.90792e+07	0.513569
MBJ2349078.1	Asp-tRNA(Asn)/Glu-tRNA(Gln) amidotransferase subunit GatB [Pseudomonas canavaninivorans]	42.83	7.61306e+07	3.9085e+07	0.513394
MBJ2345407.1	VOC family protein [Pseudomonas canavaninivorans]	21.48	2.47731e+07	1.26992e+07	0.512622
MBJ2346882.1	50S ribosomal protein L11 [Pseudomonas canavaninivorans]	59.44	1.57463e+09	8.0666e+08	0.512286
MBJ2345522.1	acetyl-CoA carboxylase carboxyltransferase subunit beta [Pseudomonas canavaninivorans]	43.79	1.73465e+08	8.88342e+07	0.512116
MBJ2347042.1	hypothetical protein JFQ02_09455 [Pseudomonas canavaninivorans]	53.73	1.44305e+08	7.38336e+07	0.511649
MBJ2349130.1	endopeptidase La [Pseudomonas canavaninivorans]	58.9	1.44582e+08	7.39477e+07	0.51146
MBJ2345881.1	DUF1311 domain-containing protein [Pseudomonas canavaninivorans]	20.97	5.55547e+07	2.83868e+07	0.51097
MBJ2348891.1	ketoacyl-ACP synthase III [Pseudomonas canavaninivorans]	57.79	4.86792e+07	2.4854e+07	0.510566
MBJ2347942.1	N-acetylmuramoyl-L-alanine amidase [Pseudomonas canavaninivorans]	13.47	2.03476e+07	1.03833e+07	0.510296
MBJ2347602.1	threonine ammonia-lyase, biosynthetic [Pseudomonas canavaninivorans]	54.37	8.24751e+07	4.2064e+07	0.510021
MBJ2348842.1	aminotransferase class V-fold PLP-dependent enzyme [Pseudomonas canavaninivorans]	20	2.16538e+07	1.10222e+07	0.509021
MBJ2349827.1	TlpA family protein disulfide reductase [Pseudomonas canavaninivorans]	54.19	17038476	8.66483e+06	0.508545
MBJ2346885.1	50S ribosomal protein L7/L12 [Pseudomonas canavaninivorans]	42.15	3.13111e+07	1.59119e+07	0.508187
MBJ2347636.1	30S ribosomal protein S6--L-glutamate ligase [Pseudomonas canavaninivorans]	26.91	2.12834e+07	1.08129e+07	0.508047
MBJ2348525.1	porphobilinogen synthase [Pseudomonas canavaninivorans]	34.72	5.74631e+07	2.9185e+07	0.507891
MBJ2349143.1	serine/threonine transporter SstT [Pseudomonas canavaninivorans]	8.29	8.21088e+07	4.16852e+07	0.507682
MBJ2345515.1	class I SAM-dependent methyltransferase [Pseudomonas canavaninivorans]	22.44	3.63279e+07	1.8431e+07	0.50735
MBJ2345903.1	DNA polymerase III subunit beta [Pseudomonas canavaninivorans]	64.58	5.12334e+08	2.59802e+08	0.507095
MBJ2348691.1	transcription termination/antitermination protein NusA [Pseudomonas canavaninivorans]	50.1	1.68205e+08	8.52376e+07	0.506748
MBJ2347960.1	DNA topoisomerase IV subunit B [Pseudomonas canavaninivorans]	25.08	3.77252e+07	1.90661e+07	0.505393
MBJ2350205.1	biopolymer transporter ExbD [Pseudomonas canavaninivorans]	43.66	1.65526e+07	8.35868e+06	0.504976
MBJ2348545.1	hydroxymethylbilane synthase [Pseudomonas canavaninivorans]	31.95	2.2026e+07	1.11147e+07	0.504615
MBJ2348515.1	acyltransferase [Pseudomonas canavaninivorans]	7.99	1.15476e+07	5.81601e+06	0.503656
MBJ2347855.1	DEAD/DEAH box helicase [Pseudomonas canavaninivorans]	35.04	4.41125e+07	2.21698e+07	0.502573
MBJ2348083.1	DEAD/DEAH box helicase [Pseudomonas canavaninivorans]	45.6	1.40344e+08	7.03481e+07	0.501254
MBJ2348798.1	NAD(P)/FAD-dependent oxidoreductase [Pseudomonas canavaninivorans]	17.88	2.25112e+07	1.12837e+07	0.501249
MBJ2350174.1	DUF1285 domain-containing protein [Pseudomonas canavaninivorans]	30.65	1.39619e+07	6.99721e+06	0.501164
MBJ2347941.1	DNA mismatch repair endonuclease MutL [Pseudomonas canavaninivorans]	8.01	19244884	9.64445e+06	0.501143
MBJ2346315.1	UMP kinase [Pseudomonas canavaninivorans]	70.45	1.40444e+08	7.02874e+07	0.500467
MBJ2346912.1	50S ribosomal protein L15 [Pseudomonas canavaninivorans]	57.93	2.53922e+09	1.2696e+09	0.499995
MBJ2348259.1	histidine ammonia-lyase [Pseudomonas canavaninivorans]	30	4.78527e+07	2.39192e+07	0.49985
MBJ2348911.1	flagellar motor switch protein FliM [Pseudomonas canavaninivorans]	39.44	4.97342e+07	2.48513e+07	0.499682
MBJ2345811.1	hypothetical protein JFQ02_03220 [Pseudomonas canavaninivorans]	33.5	2.07239e+07	1.03539e+07	0.499611
MBJ2346893.1	50S ribosomal protein L3 [Pseudomonas canavaninivorans]	53.08	2.63615e+09	1.31239e+09	0.497842
MBJ2348228.1	rhodanese-like domain-containing protein [Pseudomonas canavaninivorans]	55.47	1.62397e+08	8.08451e+07	0.497823
MBJ2348972.1	ATP-binding cassette domain-containing protein [Pseudomonas canavaninivorans]	14.55	2.11115e+07	1.05051e+07	0.497602
MBJ2347039.1	lytic murein transglycosylase [Pseudomonas canavaninivorans]	22.95	11023404	5.48415e+06	0.497501
MBJ2349099.1	ABC transporter permease subunit [Pseudomonas canavaninivorans]	17.86	3.79097e+07	1.88435e+07	0.497063
MBJ2348058.1	molybdenum cofactor biosynthesis protein B [Pseudomonas canavaninivorans]	47.49	5.72301e+07	2.8434e+07	0.496837
MBJ2346246.1	homoserine dehydrogenase [Pseudomonas canavaninivorans]	46.08	1.25026e+08	6.20605e+07	0.49638
MBJ2349742.1	cold-shock protein [Pseudomonas canavaninivorans]	40	1.66993e+08	8.27458e+07	0.495505
MBJ2350604.1	pantoate--beta-alanine ligase [Pseudomonas canavaninivorans]	29.37	3.77218e+07	1.8671e+07	0.494967
MBJ2348010.1	trifunctional transcriptional regulator/proline dehydrogenase/L-glutamate gamma-semialdehyde dehydrogenase [Pseudomonas canavaninivorans]	19.21	6.92581e+07	3.42478e+07	0.494495
MBJ2348029.1	ribonuclease E activity regulator RraA [Pseudomonas canavaninivorans]	32.52	9.12841e+07	4.51301e+07	0.494392
MBJ2345993.1	5-(carboxyamino)imidazole ribonucleotide mutase [Pseudomonas canavaninivorans]	57.67	4.77542e+07	2.3602e+07	0.494238
MBJ2346907.1	30S ribosomal protein S8 [Pseudomonas canavaninivorans]	72.31	1.40491e+09	6.94274e+08	0.494178
MBJ2346329.1	acetyl-CoA carboxylase carboxyltransferase subunit alpha [Pseudomonas canavaninivorans]	53.97	1.42453e+08	7.03111e+07	0.493575
MBJ2349237.1	acyl-CoA dehydrogenase C-terminal domain-containing protein [Pseudomonas canavaninivorans]	21.79	6.56291e+07	3.23762e+07	0.49332
MBJ2345736.1	hydrolase [Pseudomonas canavaninivorans]	33.49	6.94754e+07	3.42667e+07	0.49322
MBJ2350621.1	bifunctional aminoglycoside phosphotransferase/ATP-binding protein [Pseudomonas canavaninivorans]	56.76	126087208	6.21545e+07	0.492949
MBJ2349402.1	Tol-Pal system protein TolB [Pseudomonas canavaninivorans]	65.49	1.58854e+08	7.8291e+07	0.49285
MBJ2345770.1	translation initiation factor IF-1 [Pseudomonas canavaninivorans]	69.44	2.94813e+08	1.45275e+08	0.492769
MBJ2349451.1	ribonucleotide-diphosphate reductase subunit beta [Pseudomonas canavaninivorans]	56.73	2.08853e+08	1.02906e+08	0.492722
MBJ2349923.1	glutamate 5-kinase [Pseudomonas canavaninivorans]	32.8	5.27786e+07	2.59694e+07	0.492045
MBJ2345788.1	GNAT family N-acetyltransferase [Pseudomonas canavaninivorans]	49.65	1.6427e+07	8.07992e+06	0.491869
MBJ2347631.1	glutamate--cysteine ligase [Pseudomonas canavaninivorans]	10.44	2.31705e+07	1.13828e+07	0.491262
MBJ2346210.1	type IV pilus biogenesis/stability protein PilW [Pseudomonas canavaninivorans]	19.84	1.28999e+07	6.3366e+06	0.491215
MBJ2347692.1	hypothetical protein JFQ02_12725 [Pseudomonas canavaninivorans]	20.74	4.38758e+07	2.15424e+07	0.490985
MBJ2345814.1	SCO family protein [Pseudomonas canavaninivorans]	16.59	6.53047e+06	3.20441e+06	0.490686
MBJ2346924.1	single-stranded DNA-binding protein [Pseudomonas canavaninivorans]	44.44	2.28415e+08	111733081	0.489166
MBJ2349053.1	outer membrane lipid asymmetry maintenance protein MlaD [Pseudomonas canavaninivorans]	56.77	1.48572e+08	7.26638e+07	0.48908
MBJ2345815.1	hypothetical protein JFQ02_03240 [Pseudomonas canavaninivorans]	61.19	149001889	7.28712e+07	0.489062
MBJ2346037.1	type VI secretion system baseplate subunit TssK [Pseudomonas canavaninivorans]	77.7	1.16495e+08	5.69055e+07	0.488479
MBJ2347655.1	thioesterase domain-containing protein [Pseudomonas canavaninivorans]	15.23	2.01779e+07	9.85061e+06	0.488188
MBJ2349962.1	BON domain-containing protein [Pseudomonas canavaninivorans]	24.79	1.08069e+08	52722609	0.487862
MBJ2349069.1	carbon-nitrogen hydrolase family protein [Pseudomonas canavaninivorans]	12.2	9.20732e+06	4.4894e+06	0.48759
MBJ2345878.1	methionine ABC transporter ATP-binding protein [Pseudomonas canavaninivorans]	16.12	2.45734e+07	1.19815e+07	0.48758
MBJ2348426.1	bifunctional aconitate hydratase 2/2-methylisocitrate dehydratase [Pseudomonas canavaninivorans]	68.58	4.40782e+08	2.1482e+08	0.487361
MBJ2349176.1	VacJ family lipoprotein [Pseudomonas canavaninivorans]	12.66	2.34742e+07	1.14404e+07	0.48736
MBJ2349253.1	malate synthase G [Pseudomonas canavaninivorans]	43.03	2.05305e+08	1.00032e+08	0.487238
MBJ2346052.1	LysR family transcriptional regulator [Pseudomonas canavaninivorans]	34.97	4.0511e+07	1.97152e+07	0.486661
MBJ2348242.1	glycogen/starch/alpha-glucan phosphorylase [Pseudomonas canavaninivorans]	29.04	8.85452e+07	4.30896e+07	0.486639
MBJ2347047.1	HlyC/CorC family transporter [Pseudomonas canavaninivorans]	25.09	3.31823e+07	1.61358e+07	0.486277
MBJ2345687.1	phenylalanine--tRNA ligase subunit alpha [Pseudomonas canavaninivorans]	20.41	3.3224e+07	1.61507e+07	0.486114
MBJ2349503.1	SDR family oxidoreductase [Pseudomonas canavaninivorans]	63.89	7.92698e+07	3.85318e+07	0.486084
MBJ2348080.1	protease HtpX [Pseudomonas canavaninivorans]	20.34	3.86716e+07	1.87951e+07	0.486018
MBJ2348493.1	glycine cleavage system aminomethyltransferase GcvT [Pseudomonas canavaninivorans]	27.5	3.08913e+07	1.50076e+07	0.48582
MBJ2347026.1	glutamate-5-semialdehyde dehydrogenase [Pseudomonas canavaninivorans]	43.5	1.08517e+08	5.26661e+07	0.485326
MBJ2349534.1	electron transfer flavoprotein subunit beta/FixA family protein [Pseudomonas canavaninivorans]	65.86	7.64234e+08	3.702e+08	0.484407
MBJ2350626.1	acetolactate synthase 3 large subunit [Pseudomonas canavaninivorans]	54.53	5.87483e+08	2.84411e+08	0.484117
MBJ2345662.1	peptidyl-prolyl cis-trans isomerase [Pseudomonas canavaninivorans]	82.74	2.00582e+08	9.70686e+07	0.483935
MBJ2347811.1	ribonuclease D [Pseudomonas canavaninivorans]	17.77	1.2523e+07	6.05863e+06	0.483801
MBJ2346741.1	ABC transporter substrate-binding protein [Pseudomonas canavaninivorans]	48.84	6.90924e+07	3.33978e+07	0.483379
MBJ2347112.1	D-xylose ABC transporter substrate-binding protein [Pseudomonas canavaninivorans]	38.74	3.53521e+07	1.70649e+07	0.482712
MBJ2349354.1	PleD family two-component system response regulator [Pseudomonas canavaninivorans]	17.27	1.53611e+07	7.41064e+06	0.482429
MBJ2348138.1	zinc-dependent alcohol dehydrogenase family protein [Pseudomonas canavaninivorans]	34.9	3.86455e+07	1.8629e+07	0.482049
MBJ2345769.1	ATP-dependent Clp protease ATP-binding subunit ClpA [Pseudomonas canavaninivorans]	43.52	1.10922e+08	5.34664e+07	0.482017
MBJ2348514.1	4-hydroxy-3-polyprenylbenzoate decarboxylase [Pseudomonas canavaninivorans]	16.6	1.07427e+07	5.17379e+06	0.481609
MBJ2348643.1	xanthine dehydrogenase small subunit [Pseudomonas canavaninivorans]	11.16	1.61954e+07	7.79985e+06	0.481608
MBJ2350540.1	molecular chaperone HtpG [Pseudomonas canavaninivorans]	69.72	4.68252e+08	2.25419e+08	0.481405
MBJ2346962.1	1-deoxy-D-xylulose-5-phosphate synthase [Pseudomonas canavaninivorans]	18.04	2.39636e+07	1.14943e+07	0.479655
MBJ2347850.1	LysR family transcriptional regulator [Pseudomonas canavaninivorans]	38.11	3.06913e+07	1.4719e+07	0.479582
MBJ2347577.1	sulfotransferase [Pseudomonas canavaninivorans]	57.3	1.71162e+08	8.1942e+07	0.478739
MBJ2349343.1	phosphoribosylamine--glycine ligase [Pseudomonas canavaninivorans]	55.81	7.88316e+07	3.77065e+07	0.478317
MBJ2345839.1	NADPH:quinone reductase [Pseudomonas canavaninivorans]	69.85	2.70123e+08	1.29163e+08	0.478165
MBJ2345620.1	carbohydrate ABC transporter substrate-binding protein [Pseudomonas canavaninivorans]	58.28	3.29871e+08	1.57654e+08	0.477925
MBJ2346331.1	CTP synthase [Pseudomonas canavaninivorans]	60.77	2.26521e+08	1.08192e+08	0.477625
MBJ2347784.1	L-aspartate oxidase [Pseudomonas canavaninivorans]	16.73	2.6865e+07	1.2826e+07	0.477423
MBJ2347043.1	leucine--tRNA ligase [Pseudomonas canavaninivorans]	51.84	1.11465e+08	5.32057e+07	0.477331
MBJ2346976.1	DUF1190 domain-containing protein [Pseudomonas canavaninivorans]	35.62	4.14099e+07	1.9766e+07	0.477326
MBJ2346918.1	DNA-directed RNA polymerase subunit alpha [Pseudomonas canavaninivorans]	60.66	6.85147e+08	3.26647e+08	0.476754
MBJ2345753.1	NADH-quinone oxidoreductase subunit B [Pseudomonas canavaninivorans]	34.38	6.99675e+07	3.33549e+07	0.47672
MBJ2346988.1	bifunctional alpha/beta hydrolase/class I SAM-dependent methyltransferase [Pseudomonas canavaninivorans]	31.97	7.55091e+07	3.59909e+07	0.476644
MBJ2348280.1	bifunctional demethylmenaquinone methyltransferase/2-methoxy-6-polyprenyl-1,4-benzoquinol methylase UbiE [Pseudomonas canavaninivorans]	53.52	1.08557e+08	5.17318e+07	0.476539
MBJ2345266.1	hypothetical protein JFQ02_00410 [Pseudomonas canavaninivorans]	45.7	9.211e+07	4.3892e+07	0.476517
MBJ2348601.1	30S ribosomal protein S1 [Pseudomonas canavaninivorans]	56.84	1.41235e+09	6.7259e+08	0.476221
MBJ2348654.1	quinone-dependent dihydroorotate dehydrogenase [Pseudomonas canavaninivorans]	55.75	7.77413e+07	3.70095e+07	0.476059
MBJ2347844.1	beta-ketoacyl-ACP synthase III [Pseudomonas canavaninivorans]	29.22	5.53643e+07	2.63505e+07	0.475948
MBJ2346311.1	[protein-PII] uridylyltransferase [Pseudomonas canavaninivorans]	23.56	2.05798e+07	9.78776e+06	0.475599
MBJ2349040.1	sulfate adenylyltransferase subunit CysN [Pseudomonas canavaninivorans]	58.54	2.28144e+08	1.08477e+08	0.475479
MBJ2347865.1	GntR family transcriptional regulator [Pseudomonas canavaninivorans]	23.02	1.96231e+07	9.29365e+06	0.473607
MBJ2347261.1	fructose-bisphosphate aldolase class II [Pseudomonas canavaninivorans]	62.15	4.19714e+08	1.98497e+08	0.472934
MBJ2349585.1	inactive transglutaminase family protein [Pseudomonas canavaninivorans]	9.02	3.14586e+07	1.48665e+07	0.472576
MBJ2350551.1	succinate dehydrogenase iron-sulfur subunit [Pseudomonas canavaninivorans]	61.97	2.92838e+08	1.38302e+08	0.472283
MBJ2348471.1	glutamine synthetase [Pseudomonas canavaninivorans]	21.83	1.72415e+07	8.13897e+06	0.472058
MBJ2349964.1	DUF748 domain-containing protein [Pseudomonas canavaninivorans]	12.49	3.34487e+07	1.57853e+07	0.471927
MBJ2349058.1	LPS export ABC transporter periplasmic protein LptC [Pseudomonas canavaninivorans]	50.53	4.33992e+07	20472552	0.471727
MBJ2347716.1	imidazoleglycerol-phosphate dehydratase HisB [Pseudomonas canavaninivorans]	28.93	6.16565e+07	2.90376e+07	0.470957
MBJ2347947.1	oligoribonuclease [Pseudomonas canavaninivorans]	16.67	3.70558e+07	1.74469e+07	0.470827
MBJ2350596.1	NAD(P)H-dependent glycerol-3-phosphate dehydrogenase [Pseudomonas canavaninivorans]	23.46	3.30623e+07	1.55511e+07	0.470358
MBJ2350426.1	acireductone dioxygenase [Pseudomonas canavaninivorans]	22.65	1.47383e+07	6.93011e+06	0.470211
MBJ2347279.1	methylenetetrahydrofolate reductase [NAD(P)H] [Pseudomonas canavaninivorans]	54.8	4.0911e+07	1.92321e+07	0.470097
MBJ2345923.1	bifunctional UDP-N-acetylglucosamine diphosphorylase/glucosamine-1-phosphate N-acetyltransferase GlmU [Pseudomonas canavaninivorans]	36.04	1.00022e+08	4.6995e+07	0.469848
MBJ2347913.1	ammonia-dependent NAD(+) synthetase [Pseudomonas canavaninivorans]	50.55	4.04357e+07	1.89881e+07	0.469587
MBJ2346301.1	succinyl-diaminopimelate desuccinylase [Pseudomonas canavaninivorans]	21.67	2.9435e+07	1.38171e+07	0.46941
MBJ2346243.1	50S ribosomal protein L19 [Pseudomonas canavaninivorans]	55.17	2.46799e+09	1.15716e+09	0.468866
MBJ2345964.1	acyl-CoA thioesterase [Pseudomonas canavaninivorans]	27.33	2.76211e+07	1.29486e+07	0.468795
MBJ2350119.1	RidA family protein [Pseudomonas canavaninivorans]	70.63	8.13838e+07	3.81482e+07	0.468744
MBJ2349204.1	Co2+/Mg2+ efflux protein ApaG [Pseudomonas canavaninivorans]	37.3	2.7935e+07	1.30922e+07	0.468665
MBJ2350627.1	acetolactate synthase small subunit [Pseudomonas canavaninivorans]	55.21	4.60918e+08	2.15894e+08	0.468401
MBJ2346067.1	acetylglutamate kinase [Pseudomonas canavaninivorans]	53.49	6.56746e+07	3.07093e+07	0.467597
MBJ2348440.1	enoyl-ACP reductase [Pseudomonas canavaninivorans]	71.97	7.76285e+08	3.62887e+08	0.467466
MBJ2346109.1	50S ribosomal protein L25/general stress protein Ctc [Pseudomonas canavaninivorans]	74.5	1.69383e+09	7.91766e+08	0.467441
MBJ2347182.1	arginine decarboxylase [Pseudomonas canavaninivorans]	44.98	1.16219e+08	5.427e+07	0.466962
MBJ2347245.1	betaine-aldehyde dehydrogenase [Pseudomonas canavaninivorans]	17.35	1.72829e+07	8.06207e+06	0.466477
MBJ2348068.1	hypothetical protein JFQ02_14650 [Pseudomonas canavaninivorans]	20.72	5.57789e+07	2.59673e+07	0.465541
MBJ2349149.1	arylamine N-acetyltransferase [Pseudomonas canavaninivorans]	13.19	2.34263e+07	1.08896e+07	0.464845
MBJ2349799.1	1,4-alpha-glucan branching protein GlgB [Pseudomonas canavaninivorans]	20.3	4.5333e+07	2.10503e+07	0.464348
MBJ2349129.1	HU family DNA-binding protein [Pseudomonas canavaninivorans]	67.78	2.99824e+09	1.39125e+09	0.464021
MBJ2348973.1	transglycosylase SLT domain-containing protein [Pseudomonas canavaninivorans]	18.38	2.62883e+07	1.21838e+07	0.463469
MBJ2346273.1	lysine--tRNA ligase [Pseudomonas canavaninivorans]	55.2	1.69956e+08	7.87362e+07	0.463274
MBJ2348369.1	glutathione S-transferase N-terminal domain-containing protein [Pseudomonas canavaninivorans]	45.81	1.4628e+08	6.77439e+07	0.463111
MBJ2346880.1	preprotein translocase subunit SecE [Pseudomonas canavaninivorans]	11.48	2.25147e+08	1.04228e+08	0.462933
MBJ2347034.1	D-alanyl-D-alanine carboxypeptidase [Pseudomonas canavaninivorans]	43.64	1.85702e+08	8.58075e+07	0.462071
MBJ2348267.1	glucans biosynthesis glucosyltransferase MdoH [Pseudomonas canavaninivorans]	21.5	5.14648e+07	2.37476e+07	0.461434
MBJ2346110.1	ribose-phosphate pyrophosphokinase [Pseudomonas canavaninivorans]	58.15	6.29711e+08	2.90319e+08	0.461036
MBJ2348710.1	outer membrane protein assembly factor BamE [Pseudomonas canavaninivorans]	56	5.8384e+07	2.69001e+07	0.460745
MBJ2346783.1	UDP-N-acetylmuramoyl-L-alanine--D-glutamate ligase [Pseudomonas canavaninivorans]	39.73	4.60344e+07	2.11916e+07	0.460344
MBJ2347016.1	flavin prenyltransferase UbiX [Pseudomonas canavaninivorans]	22.86	4.4993e+07	2.06995e+07	0.460061
MBJ2349820.1	GTP diphosphokinase [Pseudomonas canavaninivorans]	30.21	6.0645e+07	2.78937e+07	0.45995
MBJ2348943.1	hypothetical protein JFQ02_19100 [Pseudomonas canavaninivorans]	24.44	2.30211e+07	1.05878e+07	0.459918
MBJ2347989.1	carbamoyltransferase [Pseudomonas canavaninivorans]	41.58	134812399	6.19155e+07	0.459271
MBJ2347351.1	class I SAM-dependent rRNA methyltransferase [Pseudomonas canavaninivorans]	27.14	4.40265e+07	2.0185e+07	0.458473
MBJ2346849.1	PLP-dependent aminotransferase family protein [Pseudomonas canavaninivorans]	23.76	1.30623e+07	5.97796e+06	0.457649
MBJ2347569.1	HlyD family efflux transporter periplasmic adaptor subunit [Pseudomonas canavaninivorans]	20.96	1.74722e+07	7.99434e+06	0.457547
MBJ2346973.1	NAD-binding protein [Pseudomonas canavaninivorans]	27.91	5.61555e+07	2.56798e+07	0.457298
MBJ2348642.1	GntR family transcriptional regulator [Pseudomonas canavaninivorans]	53.42	3.98775e+07	1.82203e+07	0.456907
MBJ2345667.1	SPOR domain-containing protein [Pseudomonas canavaninivorans]	68.6	7.7143e+07	3.5182e+07	0.456062
MBJ2346254.1	glucan biosynthesis protein D [Pseudomonas canavaninivorans]	8.87	4.4535e+06	2.02923e+06	0.455647
MBJ2348714.1	SsrA-binding protein SmpB [Pseudomonas canavaninivorans]	36.88	7.07498e+07	3.22278e+07	0.455517
MBJ2347693.1	adenylosuccinate synthetase [Pseudomonas canavaninivorans]	23.7	1.70652e+07	7.75628e+06	0.454509
MBJ2349183.1	lipoprotein-releasing ABC transporter permease subunit [Pseudomonas canavaninivorans]	28.26	2.53224e+07	1.15036e+07	0.454285
MBJ2348547.1	argininosuccinate lyase [Pseudomonas canavaninivorans]	37.5	1.25018e+08	5.67198e+07	0.453691
MBJ2348558.1	DUF484 family protein [Pseudomonas canavaninivorans]	43.33	3.43333e+07	1.55763e+07	0.453681
MBJ2349672.1	sulfate ABC transporter ATP-binding protein [Pseudomonas canavaninivorans]	39.21	3.51393e+07	1.59383e+07	0.453575
MBJ2346065.1	exodeoxyribonuclease III [Pseudomonas canavaninivorans]	50.97	7.81033e+07	3.54228e+07	0.453538
MBJ2345671.1	sugar ABC transporter substrate-binding protein [Pseudomonas canavaninivorans]	65.2	1.62565e+08	7.3701e+07	0.453364
MBJ2348938.1	cytochrome c maturation protein CcmE [Pseudomonas canavaninivorans]	15.89	2.37389e+07	1.07359e+07	0.452249
MBJ2350175.1	DUF4823 domain-containing protein [Pseudomonas canavaninivorans]	26.87	1.28784e+07	5.8222e+06	0.452091
MBJ2350467.1	LOG family protein [Pseudomonas canavaninivorans]	47.92	7.17007e+07	3.2407e+07	0.451977
MBJ2349062.1	ribosome-associated translation inhibitor RaiA [Pseudomonas canavaninivorans]	74.51	3.39891e+08	1.5355e+08	0.451761
MBJ2348980.1	aconitate hydratase AcnA [Pseudomonas canavaninivorans]	39.1	6.81738e+07	3.07867e+07	0.451592
MBJ2346313.1	30S ribosomal protein S2 [Pseudomonas canavaninivorans]	63.27	1.78453e+09	8.04076e+08	0.450581
MBJ2349528.1	galactonate dehydratase [Pseudomonas canavaninivorans]	34.29	2.7245e+07	1.22704e+07	0.45037
MBJ2346707.1	phosphoribosylformylglycinamidine synthase [Pseudomonas canavaninivorans]	42.84	1.19315e+08	5.36805e+07	0.449904
MBJ2346897.1	30S ribosomal protein S19 [Pseudomonas canavaninivorans]	67.03	1.15215e+09	5.18327e+08	0.449879
MBJ2349927.1	bifunctional riboflavin kinase/FAD synthetase [Pseudomonas canavaninivorans]	38.14	3.66518e+07	1.64843e+07	0.449755
MBJ2348702.1	carbamoyl-phosphate synthase large subunit [Pseudomonas canavaninivorans]	50.98	1.89431e+08	8.51027e+07	0.449255
MBJ2349192.1	ABC transporter substrate-binding protein [Pseudomonas canavaninivorans]	39.77	1.28596e+08	5.7688e+07	0.448598
MBJ2349591.1	2-methylaconitate cis-trans isomerase PrpF [Pseudomonas canavaninivorans]	13.13	4.58431e+07	2.05087e+07	0.447367
MBJ2348698.1	23S rRNA (uridine(2552)-2'-O)-methyltransferase RlmE [Pseudomonas canavaninivorans]	43.81	3.61856e+07	1.61637e+07	0.446689
MBJ2348639.1	NAD-dependent DNA ligase LigA [Pseudomonas canavaninivorans]	9.3	2.68489e+07	1.19846e+07	0.446373
MBJ2348997.1	cytochrome c oxidase accessory protein CcoG [Pseudomonas canavaninivorans]	22.93	5.8477e+07	2.60876e+07	0.446118
MBJ2348279.1	SCP2 sterol-binding domain-containing protein [Pseudomonas canavaninivorans]	22.93	21387445	9.53895e+06	0.446007
MBJ2345994.1	5-(carboxyamino)imidazole ribonucleotide synthase [Pseudomonas canavaninivorans]	45.43	6.54316e+07	2.91332e+07	0.445247
MBJ2348101.1	3-deoxy-7-phosphoheptulonate synthase [Pseudomonas canavaninivorans]	35.75	1.40987e+08	6.27709e+07	0.445226
MBJ2350552.1	succinate dehydrogenase flavoprotein subunit [Pseudomonas canavaninivorans]	61.02	4.38654e+08	1.94815e+08	0.444119
MBJ2348608.1	UDP-4-amino-4,6-dideoxy-N-acetyl-beta-L-altrosamine transaminase [Pseudomonas canavaninivorans]	30.83	8.65753e+07	3.83941e+07	0.443476
MBJ2346911.1	50S ribosomal protein L30 [Pseudomonas canavaninivorans]	25.86	1.72535e+09	7.64361e+08	0.443017
MBJ2346786.1	UDP-N-acetylmuramoyl-L-alanyl-D-glutamate--2,6-diaminopimelate ligase [Pseudomonas canavaninivorans]	28.54	4.69301e+07	2.0767e+07	0.442508
MBJ2349505.1	methionine--tRNA ligase [Pseudomonas canavaninivorans]	28.93	9.69683e+07	4.28742e+07	0.442146
MBJ2347935.1	ATP phosphoribosyltransferase regulatory subunit [Pseudomonas canavaninivorans]	31.9	8.3263e+07	3.67989e+07	0.441959
MBJ2349145.1	DUF480 domain-containing protein [Pseudomonas canavaninivorans]	24.65	2.64395e+07	1.16806e+07	0.441786
MBJ2348292.1	arginine--tRNA ligase [Pseudomonas canavaninivorans]	42.04	9.99185e+07	4.41122e+07	0.441482
MBJ2350370.1	carbon starvation protein A, partial [Pseudomonas canavaninivorans]	15.7	133349655	5.88638e+07	0.441425
MBJ2347024.1	bifunctional DedA family/phosphatase PAP2 family protein [Pseudomonas canavaninivorans]	6.85	2.45407e+07	1.08055e+07	0.440311
MBJ2349946.1	ATP-dependent chaperone ClpB [Pseudomonas canavaninivorans]	30.21	5.20089e+07	2.28779e+07	0.439884
MBJ2346159.1	TRAP transporter substrate-binding protein [Pseudomonas canavaninivorans]	24.55	6.32268e+07	2.77851e+07	0.439452
MBJ2350436.1	GTP cyclohydrolase I FolE [Pseudomonas canavaninivorans]	44.2	6.94678e+07	3.05183e+07	0.439315
MBJ2348873.1	aspartate/tyrosine/aromatic aminotransferase [Pseudomonas canavaninivorans]	15.11	1.56822e+07	6.88615e+06	0.439105
MBJ2346802.1	30S ribosomal protein S9 [Pseudomonas canavaninivorans]	49.23	3.28232e+09	1.44072e+09	0.438935
MBJ2348079.1	pyridoxal phosphate-dependent aminotransferase [Pseudomonas canavaninivorans]	34.99	5.98167e+07	2.62248e+07	0.438419
MBJ2349041.1	sulfate adenylyltransferase subunit CysD [Pseudomonas canavaninivorans]	46.56	2.41647e+08	1.05604e+08	0.437019
MBJ2350198.1	xanthine dehydrogenase family protein molybdopterin-binding subunit [Pseudomonas canavaninivorans]	40.86	1.06213e+08	4.64158e+07	0.437008
MBJ2348532.1	DUF1425 domain-containing protein [Pseudomonas canavaninivorans]	16.26	4.41597e+07	19276154	0.43651
MBJ2349607.1	branched-chain amino acid aminotransferase [Pseudomonas canavaninivorans]	84.96	2.49435e+08	1.08737e+08	0.435933
MBJ2346619.1	CDP-diacylglycerol--serine O-phosphatidyltransferase [Pseudomonas canavaninivorans]	28.41	3.0348e+07	1.32128e+07	0.435378
MBJ2347654.1	3'(2'),5'-bisphosphate nucleotidase CysQ [Pseudomonas canavaninivorans]	14.55	1.1685e+08	5.08099e+07	0.43483
MBJ2347031.1	rod shape-determining protein RodA [Pseudomonas canavaninivorans]	11.99	1.7483e+07	7.59516e+06	0.434432
MBJ2346217.1	pyridoxal phosphate-dependent aminotransferase [Pseudomonas canavaninivorans]	31.68	8.37747e+07	3.63806e+07	0.434267
MBJ2347328.1	thiazole synthase [Pseudomonas canavaninivorans]	44.32	2.68865e+08	1.16492e+08	0.433274
MBJ2348266.1	glucan biosynthesis protein [Pseudomonas canavaninivorans]	52.2	2.3202e+08	1.00487e+08	0.433098
MBJ2349096.1	ABC transporter substrate-binding protein [Pseudomonas canavaninivorans]	32.27	7.62363e+07	3.29506e+07	0.432216
MBJ2349355.1	DUF2333 family protein [Pseudomonas canavaninivorans]	36.62	8.59933e+07	3.71471e+07	0.431977
MBJ2350195.1	ribonuclease E [Pseudomonas canavaninivorans]	40.28	3.4957e+08	1.51003e+08	0.431968
MBJ2346714.1	elongation factor 4 [Pseudomonas canavaninivorans]	31.22	9.79264e+07	4.22821e+07	0.431775
MBJ2350548.1	dihydrolipoyl dehydrogenase [Pseudomonas canavaninivorans]	54.81	1.32761e+09	5.73086e+08	0.431669
MBJ2350192.1	S49 family peptidase [Pseudomonas canavaninivorans]	39.82	6.63536e+07	2.86147e+07	0.431245
MBJ2348345.1	potassium/proton antiporter [Pseudomonas canavaninivorans]	7.59	1.9575e+07	8.43077e+06	0.430691
MBJ2350550.1	2-oxoglutarate dehydrogenase E1 component [Pseudomonas canavaninivorans]	39.13	4.93797e+08	2.12651e+08	0.430645
MBJ2346890.1	elongation factor G [Pseudomonas canavaninivorans]	67.62	1.7828e+09	7.67705e+08	0.430617
MBJ2346000.1	phosphate ABC transporter substrate-binding protein PstS [Pseudomonas canavaninivorans]	54.52	1.37989e+08	5.94108e+07	0.430548
MBJ2346237.1	DUF21 domain-containing protein [Pseudomonas canavaninivorans]	15.5	2.93934e+07	1.26428e+07	0.430123
MBJ2346900.1	50S ribosomal protein L16 [Pseudomonas canavaninivorans]	48.18	2.47857e+09	1.0656e+09	0.429927
MBJ2350445.1	allantoicase [Pseudomonas canavaninivorans]	36.86	4.10218e+07	1.76208e+07	0.429547
MBJ2350452.1	septum site-determining protein MinD [Pseudomonas canavaninivorans]	70.74	2.50189e+08	1.07291e+08	0.42884
MBJ2346886.1	DNA-directed RNA polymerase subunit beta [Pseudomonas canavaninivorans]	65.51	7.70111e+08	3.29858e+08	0.428325
MBJ2348603.1	integration host factor subunit beta [Pseudomonas canavaninivorans]	45.92	6.62801e+07	2.83788e+07	0.428165
MBJ2348644.1	xanthine dehydrogenase molybdopterin binding subunit [Pseudomonas canavaninivorans]	8.14	7.95643e+06	3.40034e+06	0.42737
MBJ2346191.1	tRNA preQ1(34) S-adenosylmethionine ribosyltransferase-isomerase QueA [Pseudomonas canavaninivorans]	24.64	4.25302e+07	1.81606e+07	0.427005
MBJ2346720.1	valine--tRNA ligase [Pseudomonas canavaninivorans]	49.26	1.12654e+08	4.80943e+07	0.426921
MBJ2348999.1	cadmium-translocating P-type ATPase [Pseudomonas canavaninivorans]	7.99	1.0857e+07	4.63488e+06	0.426903
MBJ2350194.1	23S rRNA pseudouridine(955/2504/2580) synthase RluC [Pseudomonas canavaninivorans]	39.31	3.62276e+07	1.54346e+07	0.426045
MBJ2347262.1	MliC family protein [Pseudomonas canavaninivorans]	35.14	1.50579e+07	6.40962e+06	0.425666
MBJ2350607.1	polynucleotide adenylyltransferase PcnB [Pseudomonas canavaninivorans]	34.41	4.83454e+07	2.05606e+07	0.425286
MBJ2345504.1	excinuclease ABC subunit B [Pseudomonas canavaninivorans]	16.39	2.43658e+07	1.03557e+07	0.425009
MBJ2346059.1	bifunctional GTP diphosphokinase/guanosine-3',5'-bis pyrophosphate 3'-pyrophosphohydrolase [Pseudomonas canavaninivorans]	23.4	3.58148e+07	1.52212e+07	0.424997
MBJ2345941.1	aspartate-semialdehyde dehydrogenase [Pseudomonas canavaninivorans]	61.09	7.42063e+08	3.15232e+08	0.424804
MBJ2347646.1	acyl-CoA thioesterase [Pseudomonas canavaninivorans]	26.62	1.39709e+07	5.93372e+06	0.424719
MBJ2348689.1	30S ribosome-binding factor RbfA [Pseudomonas canavaninivorans]	45.86	9.3852e+07	3.98467e+07	0.42457
MBJ2348647.1	GntR family transcriptional regulator [Pseudomonas canavaninivorans]	59.06	8.49569e+07	3.60598e+07	0.424448
MBJ2347028.1	ribosome silencing factor [Pseudomonas canavaninivorans]	39.63	5.89964e+07	2.50184e+07	0.424067
MBJ2346919.1	50S ribosomal protein L17 [Pseudomonas canavaninivorans]	39.84	1.13178e+09	4.7847e+08	0.42276
MBJ2346192.1	tRNA guanosine(34) transglycosylase Tgt [Pseudomonas canavaninivorans]	60.11	5.20411e+07	2.19861e+07	0.422476
MBJ2348688.1	tRNA pseudouridine(55) synthase TruB [Pseudomonas canavaninivorans]	32.13	3.70658e+07	1.56575e+07	0.422425
MBJ2346804.1	NADP(H)-dependent aldo-keto reductase [Pseudomonas canavaninivorans]	51.73	2.03895e+08	8.61288e+07	0.422418
MBJ2347278.1	adenosylhomocysteinase [Pseudomonas canavaninivorans]	77.19	4.45615e+08	1.88097e+08	0.422107
MBJ2350553.1	succinate dehydrogenase, hydrophobic membrane anchor protein [Pseudomonas canavaninivorans]	15.57	2.35955e+08	9.95609e+07	0.421949
MBJ2346777.1	cell division protein FtsA [Pseudomonas canavaninivorans]	59.43	1.41034e+08	5.94864e+07	0.421788
MBJ2350065.1	carbonic anhydrase [Pseudomonas canavaninivorans]	29.22	9.5139e+07	4.01015e+07	0.421504
MBJ2346889.1	30S ribosomal protein S7 [Pseudomonas canavaninivorans]	56.41	1.35961e+09	5.72518e+08	0.421092
MBJ2345935.1	GDP-mannose pyrophosphatase NudK [Pseudomonas canavaninivorans]	36.36	3.85485e+07	1.62261e+07	0.420926
MBJ2346123.1	MerR family transcriptional regulator [Pseudomonas canavaninivorans]	23.08	1.54264e+07	6.4848e+06	0.420369
MBJ2348961.1	TetR family transcriptional regulator [Pseudomonas canavaninivorans]	57.87	7.17399e+07	3.01402e+07	0.420132
MBJ2346070.1	bifunctional phosphopantothenoylcysteine decarboxylase/phosphopantothenate--cysteine ligase CoaBC [Pseudomonas canavaninivorans]	37.56	4.80194e+07	2.01588e+07	0.419805
MBJ2348516.1	transcription termination factor Rho [Pseudomonas canavaninivorans]	68.26	1.45242e+08	6.08676e+07	0.419078
MBJ2346953.1	6,7-dimethyl-8-ribityllumazine synthase [Pseudomonas canavaninivorans]	72.78	4.87772e+08	2.03866e+08	0.417953
MBJ2349415.1	cold-shock protein [Pseudomonas canavaninivorans]	27.86	1.67214e+08	6.98607e+07	0.417793
MBJ2348556.1	diaminopimelate decarboxylase [Pseudomonas canavaninivorans]	52.29	2.38148e+08	9.9435e+07	0.417534
MBJ2346272.1	peptide chain release factor 2 [Pseudomonas canavaninivorans]	36.54	3.96038e+07	1.65291e+07	0.417362
MBJ2347966.1	DUF3298 domain-containing protein [Pseudomonas canavaninivorans]	31.17	3.08117e+07	1.28568e+07	0.417271
MBJ2347334.1	cell division ATP-binding protein FtsE [Pseudomonas canavaninivorans]	68.16	5.20418e+07	2.16845e+07	0.416675
MBJ2346225.1	IMP dehydrogenase [Pseudomonas canavaninivorans]	62.99	3.67791e+08	1.52978e+08	0.415939
MBJ2347662.1	aminotransferase [Pseudomonas canavaninivorans]	33.92	3.47625e+07	1.44566e+07	0.415868
MBJ2347619.1	L-cystine ABC transporter ATP-binding protein YecC [Pseudomonas canavaninivorans]	30.04	2.2813e+07	9.48622e+06	0.415825
MBJ2346519.1	PQQ-dependent methanol/ethanol family dehydrogenase [Pseudomonas canavaninivorans]	15.06	2.31391e+07	9.60468e+06	0.415084
MBJ2345527.1	O-succinylhomoserine sulfhydrylase [Pseudomonas canavaninivorans]	62.53	1.94829e+08	8.08687e+07	0.415075
MBJ2346884.1	50S ribosomal protein L10 [Pseudomonas canavaninivorans]	74.1	1.50426e+09	6.23717e+08	0.414634
MBJ2350359.1	NAD-glutamate dehydrogenase [Pseudomonas canavaninivorans]	55.67	3.00499e+08	1.2423e+08	0.413414
MBJ2347282.1	YceI family protein [Pseudomonas canavaninivorans]	55.56	3.58109e+08	1.4798e+08	0.413226
MBJ2350186.1	3-oxoacyl-ACP reductase FabG [Pseudomonas canavaninivorans]	47.37	4.68743e+08	1.93669e+08	0.413166
MBJ2346114.1	glutamyl-tRNA reductase [Pseudomonas canavaninivorans]	12.12	1.09129e+07	4.50529e+06	0.41284
MBJ2348315.1	excinuclease [Pseudomonas canavaninivorans]	54.73	3.10842e+08	1.28313e+08	0.412792
MBJ2347511.1	DUF2934 domain-containing protein [Pseudomonas canavaninivorans]	28.21	3.9904e+07	1.64628e+07	0.41256
MBJ2347660.1	glucose-1-phosphate thymidylyltransferase RfbA [Pseudomonas canavaninivorans]	27.15	6.24546e+07	2.57485e+07	0.412276
MBJ2349781.1	CBS domain-containing protein [Pseudomonas canavaninivorans]	28.77	3.27377e+07	1.34741e+07	0.411578
MBJ2349350.1	acetyl-CoA carboxylase biotin carboxylase subunit [Pseudomonas canavaninivorans]	55.43	4.99663e+08	2.05631e+08	0.411539
MBJ2347321.1	homoserine O-acetyltransferase [Pseudomonas canavaninivorans]	23.48	3.29006e+07	13533763	0.411353
MBJ2348049.1	pyrimidine/purine nucleoside phosphorylase [Pseudomonas canavaninivorans]	92.55	1.04081e+08	4.27279e+07	0.410525
MBJ2348791.1	EstA family serine hydrolase [Pseudomonas canavaninivorans]	5.77	3.02509e+07	1.24158e+07	0.410427
MBJ2346789.1	16S rRNA (cytosine(1402)-N(4))-methyltransferase RsmH [Pseudomonas canavaninivorans]	31.95	3.03075e+07	1.24274e+07	0.410046
MBJ2345947.1	dihydrolipoyl dehydrogenase [Pseudomonas canavaninivorans]	16.52	1.41393e+07	5.78147e+06	0.408892
MBJ2348599.1	bifunctional prephenate dehydrogenase/3-phosphoshikimate 1-carboxyvinyltransferase [Pseudomonas canavaninivorans]	37.22	1.46445e+08	5.98404e+07	0.40862
MBJ2346881.1	transcription termination/antitermination protein NusG [Pseudomonas canavaninivorans]	63.84	3.52134e+08	1.43812e+08	0.408401
MBJ2347987.1	capsule biosynthesis protein [Pseudomonas canavaninivorans]	14.72	1.08129e+07	4.41217e+06	0.408048
MBJ2348524.1	polyphosphate kinase 1 [Pseudomonas canavaninivorans]	52.57	6.44986e+07	2.62916e+07	0.40763
MBJ2347025.1	DNA-3-methyladenine glycosylase [Pseudomonas canavaninivorans]	28.76	2.97186e+07	1.21125e+07	0.407573
MBJ2348066.1	DUF883 domain-containing protein [Pseudomonas canavaninivorans]	43.27	2.90945e+07	1.18439e+07	0.407084
MBJ2348680.1	regulatory signaling modulator protein AmpE [Pseudomonas canavaninivorans]	25.18	3.19492e+07	1.29984e+07	0.406846
MBJ2349207.1	PrkA family serine protein kinase [Pseudomonas canavaninivorans]	56.56	2.7617e+08	1.12308e+08	0.406662
MBJ2346014.1	FAD-dependent oxidoreductase [Pseudomonas canavaninivorans]	33.25	3.04953e+07	12384266	0.406104
MBJ2349387.1	TetR/AcrR family transcriptional regulator [Pseudomonas canavaninivorans]	10.19	1.21426e+07	4.91457e+06	0.404738
MBJ2349068.1	metalloprotease TldD [Pseudomonas canavaninivorans]	33.54	4.94434e+07	2.00058e+07	0.40462
MBJ2347479.1	decarboxylating 6-phosphogluconate dehydrogenase [Pseudomonas canavaninivorans]	40.8	3.37006e+07	1.36346e+07	0.404581
MBJ2348763.1	proline--tRNA ligase [Pseudomonas canavaninivorans]	50.09	1.9776e+08	7.99999e+07	0.404531
MBJ2348304.1	3-dehydroquinate synthase [Pseudomonas canavaninivorans]	47.81	7.12506e+07	2.88146e+07	0.404411
MBJ2348454.1	NAD(P)H-dependent oxidoreductase [Pseudomonas canavaninivorans]	61.08	2.27886e+08	9.20495e+07	0.403928
MBJ2350600.1	3-hydroxyacyl-[acyl-carrier-protein] dehydratase FabA [Pseudomonas canavaninivorans]	38.6	4.31303e+08	1.74156e+08	0.403792
MBJ2349944.1	23S rRNA pseudouridine(1911/1915/1917) synthase RluD [Pseudomonas canavaninivorans]	24.38	4.80176e+07	1.93846e+07	0.403697
MBJ2345526.1	amidophosphoribosyltransferase [Pseudomonas canavaninivorans]	54.29	2.39314e+08	9.65872e+07	0.4036
MBJ2347877.1	TolC family outer membrane protein [Pseudomonas canavaninivorans]	56.42	2.42934e+08	9.80146e+07	0.403463
MBJ2346061.1	guanylate kinase [Pseudomonas canavaninivorans]	18.45	4.05397e+07	1.63278e+07	0.40276
MBJ2347794.1	4-hydroxy-tetrahydrodipicolinate synthase [Pseudomonas canavaninivorans]	52.74	4.44605e+07	1.79013e+07	0.402633
MBJ2347986.1	toluene tolerance protein [Pseudomonas canavaninivorans]	26.67	1.63124e+07	6.56571e+06	0.402497
MBJ2349887.1	recombination-associated protein RdgC [Pseudomonas canavaninivorans]	59.15	1.05761e+08	4.25093e+07	0.401938
MBJ2345946.1	hypothetical protein JFQ02_03900 [Pseudomonas canavaninivorans]	12.17	1.24659e+07	5.00927e+06	0.401837
MBJ2349144.1	DUF1993 domain-containing protein [Pseudomonas canavaninivorans]	59.17	1.56876e+08	6.30178e+07	0.401704
MBJ2348785.1	OmpA family protein [Pseudomonas canavaninivorans]	44.59	1.34507e+08	5.39532e+07	0.401119
MBJ2346201.1	IscS subfamily cysteine desulfurase [Pseudomonas canavaninivorans]	49.75	2.66395e+08	1.06772e+08	0.400804
MBJ2349366.1	DUF4136 domain-containing protein [Pseudomonas canavaninivorans]	16.76	6.85181e+06	2.74548e+06	0.400694
MBJ2345877.1	catalase HPII [Pseudomonas canavaninivorans]	26.86	4.62489e+07	1.85008e+07	0.400026
MBJ2346774.1	GGDEF domain-containing protein [Pseudomonas canavaninivorans]	11.24	1.41585e+07	5.65694e+06	0.399544
MBJ2347541.1	NAD(+) diphosphatase [Pseudomonas canavaninivorans]	42.03	2.59954e+07	1.03789e+07	0.39926
MBJ2345681.1	cold-shock protein [Pseudomonas canavaninivorans]	42.86	50629835	2.02097e+07	0.399165
MBJ2346115.1	peptide chain release factor 1 [Pseudomonas canavaninivorans]	9.17	5.06541e+06	2.02135e+06	0.399049
MBJ2346287.1	isocitrate lyase/phosphoenolpyruvate mutase family protein [Pseudomonas canavaninivorans]	57.51	9.0893e+07	3.62657e+07	0.398994
MBJ2346216.1	ribosome biogenesis GTPase Der [Pseudomonas canavaninivorans]	29.59	7.62324e+07	3.03706e+07	0.398395
MBJ2345840.1	oxygen-dependent coproporphyrinogen oxidase [Pseudomonas canavaninivorans]	42.76	8.79892e+07	3.5037e+07	0.398196
MBJ2350032.1	DUF883 domain-containing protein [Pseudomonas canavaninivorans]	37.04	2.2232e+07	8.84811e+06	0.397991
MBJ2346282.1	phosphoenolpyruvate carboxylase [Pseudomonas canavaninivorans]	45.09	6.56724e+07	2.60907e+07	0.397286
MBJ2350601.1	beta-ketoacyl-ACP synthase I [Pseudomonas canavaninivorans]	75.86	3.58412e+08	1.42063e+08	0.396368
MBJ2348960.1	beta-N-acetylhexosaminidase [Pseudomonas canavaninivorans]	22.89	2.78168e+07	1.10199e+07	0.39616
MBJ2349006.1	NADP-dependent oxidoreductase [Pseudomonas canavaninivorans]	18.42	2.29678e+07	9.09454e+06	0.395969
MBJ2345664.1	cysteine--tRNA ligase [Pseudomonas canavaninivorans]	61.74	1.0026e+08	3.96841e+07	0.395811
MBJ2350212.1	acyl-CoA dehydrogenase [Pseudomonas canavaninivorans]	36.2	2.76414e+07	1.09143e+07	0.394853
MBJ2346762.1	SDR family oxidoreductase [Pseudomonas canavaninivorans]	5.47	1.25974e+07	4.96971e+06	0.394504
MBJ2348944.1	polyamine aminopropyltransferase [Pseudomonas canavaninivorans]	31.27	7.08113e+07	2.79092e+07	0.394135
MBJ2346314.1	elongation factor Ts [Pseudomonas canavaninivorans]	64.93	1.29892e+09	5.11706e+08	0.393946
MBJ2349031.1	thioredoxin-disulfide reductase [Pseudomonas canavaninivorans]	45.63	1.55751e+08	6.13225e+07	0.393721
MBJ2346063.1	ribonuclease PH [Pseudomonas canavaninivorans]	24.58	5.55761e+07	2.18779e+07	0.393656
MBJ2347954.1	molecular chaperone [Pseudomonas canavaninivorans]	41.13	4.67311e+07	1.83789e+07	0.39329
MBJ2345999.1	MFS transporter [Pseudomonas canavaninivorans]	15.51	6.0803e+07	2.38913e+07	0.39293
MBJ2347990.1	phosphotransferase [Pseudomonas canavaninivorans]	30.04	3.20003e+07	1.2563e+07	0.39259
MBJ2349562.1	2-hydroxyacid dehydrogenase [Pseudomonas canavaninivorans]	18.55	9.01103e+06	3.53093e+06	0.391845
MBJ2349201.1	peptidylprolyl isomerase SurA [Pseudomonas canavaninivorans]	31.05	4.34188e+07	1.70078e+07	0.391715
MBJ2348897.1	sigma-54-dependent Fis family transcriptional regulator [Pseudomonas canavaninivorans]	38.29	1.2375e+08	4.83919e+07	0.391046
MBJ2348694.1	triose-phosphate isomerase [Pseudomonas canavaninivorans]	60.96	5.88584e+07	2.29904e+07	0.390606
MBJ2349352.1	type II 3-dehydroquinate dehydratase [Pseudomonas canavaninivorans]	47.33	6.65203e+07	25946664	0.390057
MBJ2348509.1	NADPH:quinone oxidoreductase family protein [Pseudomonas canavaninivorans]	20.31	4.15525e+07	1.6205e+07	0.389989
MBJ2349055.1	ATP-binding cassette domain-containing protein [Pseudomonas canavaninivorans]	23.79	2.59352e+07	1.0108e+07	0.389741
MBJ2347938.1	GTPase HflX [Pseudomonas canavaninivorans]	10.39	2.46361e+07	9.5891e+06	0.38923
MBJ2348087.1	DUF1127 domain-containing protein [Pseudomonas canavaninivorans]	43.06	2.62861e+07	1.02296e+07	0.389164
MBJ2346140.1	1-acyl-sn-glycerol-3-phosphate acyltransferase [Pseudomonas canavaninivorans]	34.02	4.00527e+07	1.5581e+07	0.389013
MBJ2347432.1	AAA family ATPase [Pseudomonas canavaninivorans]	28.6	6.69794e+07	2.59936e+07	0.388083
MBJ2349344.1	bifunctional phosphoribosylaminoimidazolecarboxamide formyltransferase/IMP cyclohydrolase [Pseudomonas canavaninivorans]	53.64	2.38981e+08	9.27162e+07	0.387965
MBJ2345492.1	patatin-like phospholipase family protein [Pseudomonas canavaninivorans]	25.07	8.6709e+06	3.36195e+06	0.387728
MBJ2346768.1	LysR family transcriptional regulator [Pseudomonas canavaninivorans]	13.35	1.25565e+07	4.86105e+06	0.387136
MBJ2346312.1	type I methionyl aminopeptidase [Pseudomonas canavaninivorans]	30.77	9.79345e+07	3.79012e+07	0.387006
MBJ2349876.1	carboxy terminal-processing peptidase [Pseudomonas canavaninivorans]	28.61	8.41938e+07	3.25662e+07	0.3868
MBJ2348890.1	TIGR00180 family glycosyltransferase [Pseudomonas canavaninivorans]	29.36	6.06044e+07	2.34325e+07	0.386646
MBJ2345765.1	NADP-dependent isocitrate dehydrogenase [Pseudomonas canavaninivorans]	55.06	3.33337e+08	1.28873e+08	0.386615
MBJ2345979.1	GNAT family N-acetyltransferase [Pseudomonas canavaninivorans]	63.06	1.82262e+08	7.04495e+07	0.386527
MBJ2345663.1	glutamine--tRNA ligase/YqeY domain fusion protein [Pseudomonas canavaninivorans]	33.27	1.56159e+08	6.03463e+07	0.386442
MBJ2347936.1	protease modulator HflC [Pseudomonas canavaninivorans]	54.33	2.8544e+08	1.1029e+08	0.386387
MBJ2350036.1	OsmC family protein [Pseudomonas canavaninivorans]	51.75	2.24085e+08	8.65243e+07	0.386123
MBJ2349057.1	HAD family hydrolase [Pseudomonas canavaninivorans]	49.43	1.22187e+08	4.70764e+07	0.385281
MBJ2347592.1	thymidylate synthase [Pseudomonas canavaninivorans]	14.24	2.51056e+07	9.6363e+06	0.383831
MBJ2348795.1	glycine zipper 2TM domain-containing protein [Pseudomonas canavaninivorans]	56.49	5.04872e+08	1.93753e+08	0.383766
MBJ2349232.1	pyrroloquinoline-quinone synthase PqqC [Pseudomonas canavaninivorans]	16.8	1.17641e+07	4.49502e+06	0.382097
MBJ2345892.1	glycine--tRNA ligase subunit alpha [Pseudomonas canavaninivorans]	54.57	222249900	8.48559e+07	0.381804
MBJ2349351.1	acetyl-CoA carboxylase biotin carboxyl carrier protein [Pseudomonas canavaninivorans]	25.97	3.97273e+07	1.5143e+07	0.381174
MBJ2349179.1	NADPH-dependent 7-cyano-7-deazaguanine reductase QueF [Pseudomonas canavaninivorans]	23.91	1.26927e+07	4.83134e+06	0.380638
MBJ2350433.1	cysteine hydrolase [Pseudomonas canavaninivorans]	58.16	7.95018e+07	3.02601e+07	0.380621
MBJ2346112.1	lipoprotein localization protein LolB [Pseudomonas canavaninivorans]	35.12	4.76059e+07	1.81092e+07	0.380398
MBJ2345833.1	16S rRNA (cytosine(967)-C(5))-methyltransferase RsmB [Pseudomonas canavaninivorans]	6.42	5.42964e+06	2.06444e+06	0.380217
MBJ2346835.1	ubiquinol oxidase subunit II [Pseudomonas canavaninivorans]	22.86	4.34858e+07	1.65185e+07	0.37986
MBJ2347205.1	SDR family oxidoreductase [Pseudomonas canavaninivorans]	15.44	1.27826e+07	4.85108e+06	0.379506
MBJ2349075.1	rod shape-determining protein MreB [Pseudomonas canavaninivorans]	56.52	3.76357e+08	1.42465e+08	0.378537
MBJ2346213.1	histidine--tRNA ligase [Pseudomonas canavaninivorans]	57.34	1.12093e+08	4.23958e+07	0.378221
MBJ2347681.1	RES family NAD+ phosphorylase [Pseudomonas canavaninivorans]	12.89	4.14494e+07	1.56345e+07	0.377194
MBJ2349793.1	cytochrome c oxidase accessory protein CcoG [Pseudomonas canavaninivorans]	26.38	7.84727e+07	2.95836e+07	0.376992
MBJ2347455.1	lipid A hydroxylase LpxO [Pseudomonas canavaninivorans]	29.1	2.93732e+07	1.10542e+07	0.376337
MBJ2345654.1	GNAT family N-acetyltransferase [Pseudomonas canavaninivorans]	33.64	3.68582e+07	1.38535e+07	0.37586
MBJ2349102.1	ABC transporter ATP-binding protein [Pseudomonas canavaninivorans]	10.43	1.38325e+07	5.19608e+06	0.375642
MBJ2346332.1	3-deoxy-8-phosphooctulonate synthase [Pseudomonas canavaninivorans]	56.94	2.01155e+08	7.55077e+07	0.375371
MBJ2349049.1	UDP-N-acetylglucosamine 1-carboxyvinyltransferase [Pseudomonas canavaninivorans]	56.29	2.20404e+08	8.26989e+07	0.375215
MBJ2346723.1	nucleoid-associated protein YejK [Pseudomonas canavaninivorans]	32.63	3.16934e+07	1.18787e+07	0.374802
MBJ2349187.1	glycerophosphodiester phosphodiesterase [Pseudomonas canavaninivorans]	47.08	1.73831e+08	6.51108e+07	0.374563
MBJ2349922.1	Obg family GTPase CgtA [Pseudomonas canavaninivorans]	43	5.32534e+07	1.99051e+07	0.373782
MBJ2349209.1	SpoVR family protein [Pseudomonas canavaninivorans]	24.38	2.63252e+07	9.83271e+06	0.373509
MBJ2350547.1	ADP-forming succinate--CoA ligase subunit beta [Pseudomonas canavaninivorans]	70.62	1.96018e+09	7.3187e+08	0.373368
MBJ2346839.1	chemotaxis protein CheV [Pseudomonas canavaninivorans]	24	1.4649e+07	5.46052e+06	0.372758
MBJ2348956.1	transcription-repair coupling factor [Pseudomonas canavaninivorans]	18.1	2.95099e+07	10996784	0.372647
MBJ2348498.1	Xaa-Pro aminopeptidase [Pseudomonas canavaninivorans]	6.98	11044264	4.11401e+06	0.372502
MBJ2347694.1	ImmA/IrrE family metallo-endopeptidase [Pseudomonas canavaninivorans]	16.32	2.00154e+07	7.43103e+06	0.371266
MBJ2349580.1	Asp/Glu/hydantoin racemase [Pseudomonas canavaninivorans]	24.38	3.28995e+07	1.22107e+07	0.371153
MBJ2346005.1	response regulator [Pseudomonas canavaninivorans]	17.78	2.16394e+07	8.02334e+06	0.370774
MBJ2347787.1	MucB/RseB C-terminal domain-containing protein [Pseudomonas canavaninivorans]	34.6	2.03967e+07	7.55268e+06	0.37029
MBJ2345761.1	adenylosuccinate lyase [Pseudomonas canavaninivorans]	64.47	2.01151e+08	7.43034e+07	0.36939
MBJ2347937.1	FtsH protease activity modulator HflK [Pseudomonas canavaninivorans]	40.51	1.29334e+08	4.76971e+07	0.368791
MBJ2346337.1	S-(hydroxymethyl)glutathione dehydrogenase/class III alcohol dehydrogenase [Pseudomonas canavaninivorans]	48.92	2.17601e+08	8.02392e+07	0.368745
MBJ2349262.1	hypothetical protein JFQ02_20725 [Pseudomonas canavaninivorans]	47.92	9.58835e+07	3.53377e+07	0.368549
MBJ2347928.1	30S ribosomal protein S6 [Pseudomonas canavaninivorans]	54.23	3.76345e+08	1.38525e+08	0.368081
MBJ2348889.1	glycosyltransferase [Pseudomonas canavaninivorans]	18.36	3.31814e+07	1.22106e+07	0.367996
MBJ2345773.1	thioredoxin-disulfide reductase [Pseudomonas canavaninivorans]	31.66	4.73197e+07	1.73963e+07	0.367634
MBJ2346116.1	peptide chain release factor N(5)-glutamine methyltransferase [Pseudomonas canavaninivorans]	20.29	1.46734e+07	5.38803e+06	0.367197
MBJ2345503.1	aspartate/tyrosine/aromatic aminotransferase [Pseudomonas canavaninivorans]	73.12	2.68083e+08	9.8433e+07	0.367174
MBJ2350187.1	ACP S-malonyltransferase [Pseudomonas canavaninivorans]	11.54	3.02391e+07	1.10837e+07	0.366535
MBJ2346062.1	YicC family protein [Pseudomonas canavaninivorans]	17.42	3.43353e+07	1.25609e+07	0.365831
MBJ2348104.1	L,D-transpeptidase family protein [Pseudomonas canavaninivorans]	37.15	6.33788e+07	2.31778e+07	0.365703
MBJ2349091.1	SIMPL domain-containing protein [Pseudomonas canavaninivorans]	21.43	3.24098e+07	1.18464e+07	0.36552
MBJ2349217.1	RNA polymerase sigma factor RpoD [Pseudomonas canavaninivorans]	49.92	2.49563e+08	9.11783e+07	0.365352
MBJ2348633.1	YbaB/EbfC family nucleoid-associated protein [Pseudomonas canavaninivorans]	23.21	22432716	8.18908e+06	0.365051
MBJ2349435.1	exodeoxyribonuclease I [Pseudomonas canavaninivorans]	8.21	8.70878e+06	3.17525e+06	0.364604
MBJ2346692.1	glucose/quinate/shikimate family membrane-bound PQQ-dependent dehydrogenase [Pseudomonas canavaninivorans]	17.54	2.36829e+07	8.63255e+06	0.364506
MBJ2347639.1	Hsp33 family molecular chaperone HslO [Pseudomonas canavaninivorans]	21.33	2.89426e+07	1.05484e+07	0.364461
MBJ2348517.1	thioredoxin TrxA [Pseudomonas canavaninivorans]	33.03	4.00528e+07	1.45624e+07	0.363579
MBJ2345913.1	ParB/RepB/Spo0J family partition protein [Pseudomonas canavaninivorans]	53.1	3.09479e+07	1.12279e+07	0.362799
MBJ2347319.1	pyrroline-5-carboxylate reductase [Pseudomonas canavaninivorans]	35.66	2.11738e+07	7.67909e+06	0.362669
MBJ2346149.1	fatty acid--CoA ligase [Pseudomonas canavaninivorans]	38.75	6.57699e+07	2.37995e+07	0.36186
MBJ2349208.1	YeaH/YhbH family protein [Pseudomonas canavaninivorans]	10.4	1.97447e+07	7.13583e+06	0.361405
MBJ2349105.1	peptide chain release factor 3 [Pseudomonas canavaninivorans]	28.73	4.87104e+07	1.75768e+07	0.360842
MBJ2346574.1	RtcB family protein [Pseudomonas canavaninivorans]	14.71	7.60134e+06	2.73563e+06	0.359888
MBJ2349791.1	SDR family oxidoreductase [Pseudomonas canavaninivorans]	60.89	7.56912e+07	2.71933e+07	0.359266
MBJ2347915.1	TIGR00730 family Rossman fold protein [Pseudomonas canavaninivorans]	12.82	2.71059e+07	9.72233e+06	0.35868
MBJ2347663.1	N-carbamoylputrescine amidase [Pseudomonas canavaninivorans]	32.88	5.01738e+07	1.79919e+07	0.358591
MBJ2346940.1	outer membrane beta-barrel protein [Pseudomonas canavaninivorans]	35.34	2.19389e+07	7.86446e+06	0.358471
MBJ2349385.1	SDR family oxidoreductase [Pseudomonas canavaninivorans]	82.89	3.29506e+07	1.17996e+07	0.3581
MBJ2348417.1	type VI secretion system contractile sheath large subunit [Pseudomonas canavaninivorans]	58.22	1.2176e+08	4.35872e+07	0.357977
MBJ2346387.1	TIGR00730 family Rossman fold protein [Pseudomonas canavaninivorans]	45.7	5.57631e+07	1.9947e+07	0.357709
MBJ2348307.1	FAD-dependent oxidoreductase [Pseudomonas canavaninivorans]	52.97	1.12949e+08	4.03626e+07	0.357354
MBJ2347335.1	signal recognition particle-docking protein FtsY [Pseudomonas canavaninivorans]	28.94	2.44873e+07	8.74558e+06	0.357148
MBJ2346810.1	DUF1043 family protein [Pseudomonas canavaninivorans]	55.86	1.01207e+08	3.61237e+07	0.356931
MBJ2347979.1	bifunctional D-glycero-beta-D-manno-heptose-7-phosphate kinase/D-glycero-beta-D-manno-heptose 1-phosphate adenylyltransferase HldE [Pseudomonas canavaninivorans]	42.92	6.59229e+07	2.34905e+07	0.356333
MBJ2348046.1	transporter substrate-binding domain-containing protein [Pseudomonas canavaninivorans]	11.63	3.10728e+07	1.10711e+07	0.356295
MBJ2349199.1	phosphotransferase [Pseudomonas canavaninivorans]	7.62	2.6972e+07	9599826	0.355918
MBJ2348245.1	class 1 fructose-bisphosphatase [Pseudomonas canavaninivorans]	45.24	8.66767e+07	3.06422e+07	0.353522
MBJ2348607.1	UDP-N-acetylglucosamine 4,6-dehydratase (inverting) [Pseudomonas canavaninivorans]	49.7	3.11249e+08	1.09846e+08	0.35292
MBJ2348605.1	LPS O-antigen chain length determinant protein WzzB [Pseudomonas canavaninivorans]	11.17	3.64372e+07	1.28574e+07	0.352865
MBJ2347781.1	folate-binding protein YgfZ [Pseudomonas canavaninivorans]	50.8	6.44718e+07	2.27327e+07	0.3526
MBJ2348264.1	prolyl aminopeptidase [Pseudomonas canavaninivorans]	46.13	1.05191e+08	3.70871e+07	0.352569
MBJ2348595.1	DNA gyrase subunit A [Pseudomonas canavaninivorans]	43.71	1.31574e+08	4.63551e+07	0.352313
MBJ2347719.1	1-(5-phosphoribosyl)-5-[(5-phosphoribosylamino)methylideneamino]imidazole-4-carboxamide isomerase [Pseudomonas canavaninivorans]	60	9.24107e+07	3.24626e+07	0.351286
MBJ2346226.1	glutamine-hydrolyzing GMP synthase [Pseudomonas canavaninivorans]	73.71	2.53372e+08	8.88876e+07	0.350818
MBJ2346716.1	LPS export ABC transporter permease LptF [Pseudomonas canavaninivorans]	17.16	5.55332e+07	1.94816e+07	0.35081
MBJ2348671.1	AraC family transcriptional regulator [Pseudomonas canavaninivorans]	21.59	1.24688e+07	4.3676e+06	0.350282
MBJ2346326.1	lipid-A-disaccharide synthase [Pseudomonas canavaninivorans]	18.09	1.20051e+07	4.19351e+06	0.349312
MBJ2348817.1	ornithine carbamoyltransferase [Pseudomonas canavaninivorans]	6.85	1.6154e+07	5.62836e+06	0.34842
MBJ2345890.1	lysophospholipid acyltransferase [Pseudomonas canavaninivorans]	36.95	2.92404e+07	1.01832e+07	0.348257
MBJ2346018.1	DUF1795 domain-containing protein [Pseudomonas canavaninivorans]	70.83	9.65603e+07	3.35818e+07	0.347781
MBJ2345893.1	glycine--tRNA ligase subunit beta [Pseudomonas canavaninivorans]	40.35	8.55709e+07	2.9679e+07	0.346836
MBJ2349756.1	arginine N-succinyltransferase [Pseudomonas canavaninivorans]	41.42	4.21192e+07	1.45838e+07	0.34625
MBJ2348976.1	4-phosphoerythronate dehydrogenase PdxB [Pseudomonas canavaninivorans]	11.58	1.75719e+07	6.07769e+06	0.345876
MBJ2350464.1	chemotaxis protein [Pseudomonas canavaninivorans]	28.47	4.62144e+07	1.5973e+07	0.345629
MBJ2345816.1	EcsC family protein [Pseudomonas canavaninivorans]	30.09	1.34215e+08	4.6281e+07	0.344828
MBJ2347675.1	2OG-Fe dioxygenase family protein [Pseudomonas canavaninivorans]	76.21	7.73206e+08	2.65671e+08	0.343596
MBJ2348904.1	flagellar protein export ATPase FliI [Pseudomonas canavaninivorans]	5.53	1.06776e+07	3.6672e+06	0.343448
MBJ2347829.1	DUF2937 family protein [Pseudomonas canavaninivorans]	41.11	3.58072e+07	1.22505e+07	0.342126
MBJ2348594.1	S-methyl-5-thioribose-1-phosphate isomerase [Pseudomonas canavaninivorans]	31.56	8.08637e+07	2.7577e+07	0.341031
MBJ2346251.1	YaeQ family protein [Pseudomonas canavaninivorans]	15	2.19421e+07	7.47958e+06	0.340879
MBJ2346107.1	redox-regulated ATPase YchF [Pseudomonas canavaninivorans]	48.09	1.78993e+08	6.08174e+07	0.339776
MBJ2348733.1	type I restriction enzyme HsdR N-terminal domain-containing protein [Pseudomonas canavaninivorans]	27.11	1.59038e+07	5.39742e+06	0.339379
MBJ2347785.1	RNA polymerase sigma factor RpoE [Pseudomonas canavaninivorans]	31.61	1.28262e+07	4.35176e+06	0.339287
MBJ2350602.1	glucose-6-phosphate isomerase [Pseudomonas canavaninivorans]	41.52	4.45313e+08	1.50971e+08	0.339023
MBJ2349358.1	arginine decarboxylase [Pseudomonas canavaninivorans]	31.55	1.64219e+08	5.56735e+07	0.33902
MBJ2347814.1	nitroreductase family protein [Pseudomonas canavaninivorans]	47.72	1.45707e+08	4.93603e+07	0.338765
MBJ2347284.1	flavin monoamine oxidase family protein [Pseudomonas canavaninivorans]	39.73	5.91103e+07	1.99102e+07	0.336831
MBJ2349047.1	histidinol dehydrogenase [Pseudomonas canavaninivorans]	49.21	8.97753e+07	3.02036e+07	0.336436
MBJ2347009.1	GNAT family N-acetyltransferase [Pseudomonas canavaninivorans]	52.29	7.64394e+07	2.57159e+07	0.336422
MBJ2347706.1	GAF domain-containing protein [Pseudomonas canavaninivorans]	23.79	1.63109e+07	5.47514e+06	0.335674
MBJ2350206.1	MotA/TolQ/ExbB proton channel family protein [Pseudomonas canavaninivorans]	30.81	1.78265e+07	5.95533e+06	0.334073
MBJ2347897.1	TetR family transcriptional regulator [Pseudomonas canavaninivorans]	11.9	2.2905e+07	7.63718e+06	0.333429
MBJ2347596.1	phosphoenolpyruvate--protein phosphotransferase [Pseudomonas canavaninivorans]	43.35	4.89013e+07	1.62996e+07	0.333316
MBJ2345841.1	shikimate dehydrogenase [Pseudomonas canavaninivorans]	11.72	1.45518e+07	4.8419e+06	0.332735
MBJ2346214.1	tetratricopeptide repeat protein [Pseudomonas canavaninivorans]	51.64	5.2185e+07	1.73079e+07	0.331665
MBJ2346276.1	flavohemoglobin expression-modulating QEGLA motif protein [Pseudomonas canavaninivorans]	6.35	3.74237e+07	1.2393e+07	0.331155
MBJ2345901.1	DNA topoisomerase (ATP-hydrolyzing) subunit B [Pseudomonas canavaninivorans]	46.09	1.99624e+08	6.60785e+07	0.331014
MBJ2349173.1	transaldolase [Pseudomonas canavaninivorans]	59.09	3.74173e+08	1.23575e+08	0.330261
MBJ2348032.1	kinase/pyrophosphorylase [Pseudomonas canavaninivorans]	49.63	5.03179e+07	1.65828e+07	0.329561
MBJ2349071.1	ribonuclease G [Pseudomonas canavaninivorans]	32.37	3.63277e+07	1.19462e+07	0.328846
MBJ2348099.1	5'-nucleotidase [Pseudomonas canavaninivorans]	23.92	2.46516e+07	8.08473e+06	0.327959
MBJ2348523.1	exopolyphosphatase [Pseudomonas canavaninivorans]	45.2	1.04055e+08	3.40651e+07	0.327377
MBJ2349771.1	glutathione S-transferase N-terminal domain-containing protein [Pseudomonas canavaninivorans]	23.28	4.01126e+07	1.31126e+07	0.326896
MBJ2346003.1	phosphate ABC transporter ATP-binding protein [Pseudomonas canavaninivorans]	36.1	4.07892e+07	1.33223e+07	0.326614
MBJ2345514.1	3-isopropylmalate dehydratase small subunit [Pseudomonas canavaninivorans]	31.78	1.57379e+07	5.13266e+06	0.326134
MBJ2349203.1	16S rRNA (adenine(1518)-N(6)/adenine(1519)-N(6))-dimethyltransferase RsmA [Pseudomonas canavaninivorans]	37.87	2.41042e+07	7.84525e+06	0.325473
MBJ2349046.1	histidinol-phosphate transaminase [Pseudomonas canavaninivorans]	42.57	1.15567e+08	3.75019e+07	0.324504
MBJ2346084.1	FAD-binding oxidoreductase [Pseudomonas canavaninivorans]	13.04	7.45623e+06	2.41221e+06	0.323517
MBJ2349687.1	EAL domain-containing protein [Pseudomonas canavaninivorans]	25.62	4.05111e+07	1.30704e+07	0.322637
MBJ2348573.1	DNA helicase Rep [Pseudomonas canavaninivorans]	8.37	1.1404e+07	3.67757e+06	0.322482
MBJ2348287.1	class II poly(R)-hydroxyalkanoic acid synthase [Pseudomonas canavaninivorans]	54.2	1.19855e+08	3.86328e+07	0.322329
MBJ2349681.1	SRPBCC family protein [Pseudomonas canavaninivorans]	31.17	1.41123e+07	4.54319e+06	0.321933
MBJ2349484.1	YciI family protein [Pseudomonas canavaninivorans]	56.57	2.09875e+07	6741209	0.321201
MBJ2346396.1	DUF1456 family protein [Pseudomonas canavaninivorans]	56.21	6.05432e+07	1.94327e+07	0.320972
MBJ2347634.1	two-component system response regulator OmpR [Pseudomonas canavaninivorans]	54.47	5.93221e+07	1.90278e+07	0.320754
MBJ2348074.1	ATP-binding protein [Pseudomonas canavaninivorans]	49.66	1.0443e+08	3.34899e+07	0.320692
MBJ2348002.1	peptide-methionine (S)-S-oxide reductase MsrA [Pseudomonas canavaninivorans]	39.07	1.57907e+08	5.06127e+07	0.320523
MBJ2347797.1	phosphoribosylaminoimidazolesuccinocarboxamide synthase [Pseudomonas canavaninivorans]	61.6	3.00543e+08	9.63159e+07	0.320473
MBJ2345292.1	J domain-containing protein [Pseudomonas canavaninivorans]	4.76	1.52613e+07	4.88128e+06	0.319847
MBJ2345441.1	type VI secretion system amidase effector protein Tae4 [Pseudomonas canavaninivorans]	84.34	2.44902e+08	7.81177e+07	0.318975
MBJ2349420.1	YajQ family cyclic di-GMP-binding protein [Pseudomonas canavaninivorans]	34.78	2.74671e+07	8.74565e+06	0.318405
MBJ2348225.1	S41 family peptidase [Pseudomonas canavaninivorans]	36.53	1.12177e+08	3.56395e+07	0.317707
MBJ2346127.1	ferrochelatase [Pseudomonas canavaninivorans]	40.47	4.05997e+07	1.27915e+07	0.315064
MBJ2346745.1	PhoH family protein [Pseudomonas canavaninivorans]	19.18	6.75772e+07	2.11795e+07	0.313411
MBJ2349004.1	adenine phosphoribosyltransferase [Pseudomonas canavaninivorans]	45.6	9.40791e+07	2.94573e+07	0.313112
MBJ2350499.1	L-lactate permease [Pseudomonas canavaninivorans]	7.5	3.52585e+07	1.10363e+07	0.313011
MBJ2348574.1	xanthine phosphoribosyltransferase [Pseudomonas canavaninivorans]	52.11	3.49697e+07	1.09338e+07	0.312666
MBJ2348930.1	chemotaxis protein CheW [Pseudomonas canavaninivorans]	76.4	1.5226e+08	4.71418e+07	0.309614
MBJ2346222.1	exodeoxyribonuclease VII large subunit [Pseudomonas canavaninivorans]	7.19	1.45522e+07	4.49508e+06	0.308894
MBJ2349191.1	ABC transporter permease [Pseudomonas canavaninivorans]	6.51	1.39063e+07	4.28355e+06	0.308028
MBJ2349368.1	3-oxoacyl-ACP reductase [Pseudomonas canavaninivorans]	46.22	3.21414e+07	9.8801e+06	0.307395
MBJ2347817.1	DUF2892 domain-containing protein [Pseudomonas canavaninivorans]	56	5.15221e+07	1.58331e+07	0.307308
MBJ2347789.1	M48 family metallopeptidase [Pseudomonas canavaninivorans]	14.26	2.45194e+07	7.50825e+06	0.306217
MBJ2348416.1	type VI secretion system tube protein Hcp [Pseudomonas canavaninivorans]	47.27	1.33282e+08	4.06658e+07	0.305111
MBJ2345911.1	16S rRNA (guanine(527)-N(7))-methyltransferase RsmG [Pseudomonas canavaninivorans]	24.64	2.10442e+07	6.41543e+06	0.304854
MBJ2349375.1	hypothetical protein JFQ02_21295 [Pseudomonas canavaninivorans]	20.47	5.73943e+07	1.7459e+07	0.304194
MBJ2345265.1	serine hydrolase [Pseudomonas canavaninivorans]	30.19	7.39432e+07	2.22599e+07	0.30104
MBJ2348028.1	zinc transporter ZntB [Pseudomonas canavaninivorans]	32.02	2.33093e+07	6.95533e+06	0.298393
MBJ2350306.1	hypothetical protein JFQ02_26065 [Pseudomonas canavaninivorans]	28.98	1.16536e+08	3.47474e+07	0.298168
MBJ2347910.1	aldehyde dehydrogenase family protein [Pseudomonas canavaninivorans]	26.81	1.52845e+07	4.53744e+06	0.296865
MBJ2347548.1	DUF3313 domain-containing protein [Pseudomonas canavaninivorans]	53.36	7.37982e+07	2.18876e+07	0.296587
MBJ2347115.1	hypothetical protein JFQ02_09820 [Pseudomonas canavaninivorans]	5.81	1.53568e+07	4.53864e+06	0.295547
MBJ2348872.1	NAD(P)H nitroreductase [Pseudomonas canavaninivorans]	32.62	2.78126e+07	8.21943e+06	0.295529
MBJ2349407.1	Holliday junction branch migration DNA helicase RuvB [Pseudomonas canavaninivorans]	30.31	1.4759e+07	4.35465e+06	0.295051
MBJ2349659.1	DNA damage-inducible protein D [Pseudomonas canavaninivorans]	25.8	7.24318e+07	2.13647e+07	0.294963
MBJ2349690.1	LapA family giant adhesin, partial [Pseudomonas canavaninivorans]	1.82	7.08074e+06	2.08432e+06	0.294364
MBJ2347975.1	metal ABC transporter ATPase [Pseudomonas canavaninivorans]	15.89	1.68275e+07	4.93958e+06	0.293543
MBJ2348407.1	phosphotransferase family protein [Pseudomonas canavaninivorans]	15.21	2.31701e+07	6.7839e+06	0.292786
MBJ2347254.1	GNAT family N-acetyltransferase [Pseudomonas canavaninivorans]	18.67	3.05983e+07	8.95238e+06	0.292578
MBJ2346344.1	RNA polymerase sigma factor RpoS [Pseudomonas canavaninivorans]	45.37	2.56044e+08	7.4817e+07	0.292203
MBJ2347570.1	biotin/lipoyl-binding protein [Pseudomonas canavaninivorans]	2.15	1.09442e+07	3.19589e+06	0.292018
MBJ2347250.1	ATP-dependent RNA helicase DbpA [Pseudomonas canavaninivorans]	12.58	1.24884e+07	3.63622e+06	0.291168
MBJ2347607.1	FAD-binding oxidoreductase [Pseudomonas canavaninivorans]	41.59	1.21271e+08	3.53018e+07	0.291097
MBJ2346342.1	protein-L-isoaspartate(D-aspartate) O-methyltransferase [Pseudomonas canavaninivorans]	46.45	3.47726e+07	1.0111e+07	0.290774
MBJ2350608.1	sigma-54-dependent Fis family transcriptional regulator [Pseudomonas canavaninivorans]	26	2.15726e+07	6.26605e+06	0.290463
MBJ2347446.1	mannitol dehydrogenase family protein [Pseudomonas canavaninivorans]	11.16	1.33159e+07	3.86267e+06	0.290079
MBJ2349477.1	leucyl aminopeptidase [Pseudomonas canavaninivorans]	26.17	2.5436e+07	7.37624e+06	0.289992
MBJ2349939.1	glycine oxidase ThiO [Pseudomonas canavaninivorans]	12.57	1.67396e+07	4.8426e+06	0.289291
MBJ2345724.1	hypothetical protein JFQ02_02785 [Pseudomonas canavaninivorans]	26.32	4.64112e+07	1.33185e+07	0.286968
MBJ2348874.1	4a-hydroxytetrahydrobiopterin dehydratase [Pseudomonas canavaninivorans]	53.39	7.83179e+07	2.23946e+07	0.285944
MBJ2348406.1	SDR family oxidoreductase [Pseudomonas canavaninivorans]	46.67	1.14159e+08	3.26256e+07	0.28579
MBJ2348995.1	ankyrin repeat domain-containing protein [Pseudomonas canavaninivorans]	8.64	2.66198e+07	7.60165e+06	0.285564
MBJ2346099.1	DUF3592 domain-containing protein [Pseudomonas canavaninivorans]	40.82	8.77597e+07	2.50357e+07	0.285275
MBJ2347107.1	LysR family transcriptional regulator [Pseudomonas canavaninivorans]	12.46	1.17501e+07	3.34511e+06	0.284689
MBJ2350035.1	LLM class flavin-dependent oxidoreductase [Pseudomonas canavaninivorans]	31.83	5.28108e+07	1.50294e+07	0.28459
MBJ2347993.1	lipopolysaccharide core heptose(I) kinase RfaP [Pseudomonas canavaninivorans]	26.12	1.65107e+07	4.68746e+06	0.283905
MBJ2349931.1	4-hydroxy-3-methylbut-2-enyl diphosphate reductase [Pseudomonas canavaninivorans]	7.3	2.87856e+07	8170070	0.283825
MBJ2349875.1	zinc-binding dehydrogenase [Pseudomonas canavaninivorans]	23.44	2.87135e+07	8.12996e+06	0.283141
MBJ2348677.1	catabolite repressor/activator [Pseudomonas canavaninivorans]	25.98	2.69605e+07	7.62615e+06	0.282864
MBJ2345952.1	class I SAM-dependent methyltransferase [Pseudomonas canavaninivorans]	38.73	7.10195e+07	2.00693e+07	0.282589
MBJ2347522.1	histidine kinase [Pseudomonas canavaninivorans]	9.55	9.4618e+06	2.66491e+06	0.281649
MBJ2345832.1	Trk system potassium transporter TrkA [Pseudomonas canavaninivorans]	8.75	2.06059e+07	5.80322e+06	0.281629
MBJ2349637.1	methionine synthase [Pseudomonas canavaninivorans]	25.08	6.74634e+07	1.89928e+07	0.281527
MBJ2346666.1	response regulator [Pseudomonas canavaninivorans]	70.99	1.7458e+08	4.91216e+07	0.281369
MBJ2349855.1	flagellar brake protein [Pseudomonas canavaninivorans]	78.63	1.2935e+08	3.62707e+07	0.280406
MBJ2345997.1	D-hexose-6-phosphate mutarotase [Pseudomonas canavaninivorans]	32.11	3.09023e+07	8.65133e+06	0.279958
MBJ2345868.1	YihA family ribosome biogenesis GTP-binding protein [Pseudomonas canavaninivorans]	34.74	7.8608e+07	2.19851e+07	0.279681
MBJ2345767.1	cold shock domain-containing protein CspD [Pseudomonas canavaninivorans]	42.71	5.72893e+07	1.59805e+07	0.278943
MBJ2347772.1	enoyl-CoA hydratase/isomerase family protein [Pseudomonas canavaninivorans]	26.76	2.82983e+07	7.8367e+06	0.276931
MBJ2348428.1	universal stress protein [Pseudomonas canavaninivorans]	26.83	6.02906e+07	1.663e+07	0.275832
MBJ2347950.1	flagellar motor stator protein MotA [Pseudomonas canavaninivorans]	10.6	2.03499e+07	5.59516e+06	0.274947
MBJ2346057.1	hypothetical protein JFQ02_04465 [Pseudomonas canavaninivorans]	19.11	1.52128e+07	4.18148e+06	0.274865
MBJ2345209.1	UvrY/SirA/GacA family response regulator transcription factor [Pseudomonas canavaninivorans]	64.79	6.42355e+07	1.7597e+07	0.273945
MBJ2348306.1	glutamate synthase large subunit [Pseudomonas canavaninivorans]	55.94	1.80744e+08	4.93697e+07	0.273147
MBJ2349552.1	magnesium and cobalt transport protein CorA [Pseudomonas canavaninivorans]	16.41	2.64193e+07	7.20955e+06	0.272889
MBJ2348448.1	methyltransferase domain-containing protein [Pseudomonas canavaninivorans]	17.06	1.01802e+07	2.77444e+06	0.272532
MBJ2347317.1	type IV pilus twitching motility protein PilT [Pseudomonas canavaninivorans]	47.09	4.59942e+07	1.25229e+07	0.27227
MBJ2345860.1	PAS domain-containing protein [Pseudomonas canavaninivorans]	7.55	8.21553e+06	2.23563e+06	0.272122
MBJ2347183.1	putrescine-ornithine antiporter [Pseudomonas canavaninivorans]	5.97	3.63162e+07	9.87795e+06	0.271998
MBJ2350453.1	cell division topological specificity factor MinE [Pseudomonas canavaninivorans]	41.67	1.11861e+08	3.0414e+07	0.271891
MBJ2348598.1	histidinol-phosphate transaminase [Pseudomonas canavaninivorans]	41.08	5.14375e+07	1.39517e+07	0.271236
MBJ2349054.1	lipid asymmetry maintenance ABC transporter permease subunit MlaE [Pseudomonas canavaninivorans]	25.28	4.52762e+07	1.22794e+07	0.271211
MBJ2349066.1	metalloprotease PmbA [Pseudomonas canavaninivorans]	41.07	6.90481e+07	1.8609e+07	0.269508
MBJ2350210.1	ABC transporter ATP-binding protein [Pseudomonas canavaninivorans]	33.55	4.14138e+07	1.11588e+07	0.269447
MBJ2347049.1	PhoH family protein [Pseudomonas canavaninivorans]	25.89	5.60261e+07	1.50187e+07	0.268066
MBJ2350191.1	septum formation inhibitor Maf [Pseudomonas canavaninivorans]	28.65	8.08463e+06	2.16349e+06	0.267605
MBJ2345708.1	TetR/AcrR family transcriptional regulator [Pseudomonas canavaninivorans]	8.58	1.48211e+07	3.96054e+06	0.267223
MBJ2346135.1	malate dehydrogenase (quinone) [Pseudomonas canavaninivorans]	35.06	1.27938e+08	3.41461e+07	0.266897
MBJ2349186.1	PilZ domain-containing protein [Pseudomonas canavaninivorans]	15.66	7.69956e+07	2.05364e+07	0.266721
MBJ2348377.1	Gfo/Idh/MocA family oxidoreductase [Pseudomonas canavaninivorans]	26.79	4.48442e+07	1.19563e+07	0.266618
MBJ2349072.1	septum formation inhibitor Maf [Pseudomonas canavaninivorans]	26.77	2.49828e+07	6.64423e+06	0.265952
MBJ2347020.1	MaoC family dehydratase [Pseudomonas canavaninivorans]	78.15	5.63324e+08	1.49578e+08	0.265528
MBJ2346394.1	ferredoxin-NADP reductase [Pseudomonas canavaninivorans]	71.81	2.04429e+08	5.40532e+07	0.264411
MBJ2348818.1	arginine deiminase [Pseudomonas canavaninivorans]	23.21	2.67823e+07	7.05678e+06	0.263487
MBJ2348548.1	glutathione S-transferase family protein [Pseudomonas canavaninivorans]	65.3	3.13804e+08	8.26444e+07	0.263363
MBJ2349405.1	protein TolQ [Pseudomonas canavaninivorans]	31.6	1.267e+08	3.32713e+07	0.262599
MBJ2348924.1	chemotaxis protein CheA [Pseudomonas canavaninivorans]	27.32	8.49229e+07	2.22635e+07	0.262162
MBJ2348088.1	LysR family transcriptional regulator [Pseudomonas canavaninivorans]	33.1	2.91249e+07	7.63454e+06	0.262131
MBJ2350497.1	4-hydroxyphenylpyruvate dioxygenase [Pseudomonas canavaninivorans]	26.54	5.1995e+07	1.35848e+07	0.261271
MBJ2347645.1	3-hydroxyacyl-CoA dehydrogenase [Pseudomonas canavaninivorans]	17.4	2.43132e+07	6.33351e+06	0.260497
MBJ2345888.1	SDR family oxidoreductase [Pseudomonas canavaninivorans]	68.7	1.85837e+08	4.82511e+07	0.259642
MBJ2348051.1	chemotaxis protein CheV [Pseudomonas canavaninivorans]	42.35	4.52647e+07	1.17393e+07	0.259347
MBJ2347973.1	FAD-dependent oxidoreductase [Pseudomonas canavaninivorans]	20.72	2.9567e+07	7.64177e+06	0.258456
MBJ2347955.1	phosphoserine phosphatase SerB [Pseudomonas canavaninivorans]	30.94	3.76162e+07	9.6824e+06	0.2574
MBJ2346310.1	succinyldiaminopimelate transaminase [Pseudomonas canavaninivorans]	38.85	1.28513e+08	3.29094e+07	0.256079
MBJ2350246.1	pyridoxamine 5'-phosphate oxidase family protein [Pseudomonas canavaninivorans]	51.5	2.38791e+07	6.10883e+06	0.255823
MBJ2347438.1	response regulator [Pseudomonas canavaninivorans]	31.52	1.11052e+08	2.81782e+07	0.253739
MBJ2347349.1	HDOD domain-containing protein [Pseudomonas canavaninivorans]	29.76	3.35231e+07	8.50424e+06	0.253683
MBJ2346958.1	GTP cyclohydrolase II [Pseudomonas canavaninivorans]	57.07	4.09101e+07	1.03765e+07	0.253643
MBJ2345524.1	SPOR domain-containing protein [Pseudomonas canavaninivorans]	8.29	6.38553e+07	1.61808e+07	0.253397
MBJ2346126.1	TIGR01777 family oxidoreductase [Pseudomonas canavaninivorans]	35.79	4.63227e+07	1.1677e+07	0.25208
MBJ2348838.1	MurR/RpiR family transcriptional regulator [Pseudomonas canavaninivorans]	61.54	5.00345e+07	1.2586e+07	0.251547
MBJ2349724.1	glycerol kinase GlpK [Pseudomonas canavaninivorans]	75.45	1.16958e+09	2.94005e+08	0.251377
MBJ2350566.1	hydroxypyruvate isomerase [Pseudomonas canavaninivorans]	53.85	4.6797e+07	1.16418e+07	0.248773
MBJ2348230.1	protein-export chaperone SecB [Pseudomonas canavaninivorans]	56.88	1.51337e+08	3.75291e+07	0.247983
MBJ2345900.1	hypothetical protein JFQ02_03665 [Pseudomonas canavaninivorans]	40.17	3.61233e+07	8.8982e+06	0.246329
MBJ2349003.1	fumarate/nitrate reduction transcriptional regulator Fnr [Pseudomonas canavaninivorans]	29.92	79682137	1.93215e+07	0.242482
MBJ2347608.1	phosphoglycerate dehydrogenase [Pseudomonas canavaninivorans]	68.22	8.18952e+08	1.98546e+08	0.242439
MBJ2349327.1	PepSY domain-containing protein [Pseudomonas canavaninivorans]	15.25	4.24028e+07	1.02755e+07	0.242332
MBJ2350491.1	alkyl hydroperoxide reductase subunit F [Pseudomonas canavaninivorans]	19.04	2.5106e+07	6.08223e+06	0.242262
MBJ2347914.1	azurin [Pseudomonas canavaninivorans]	52.7	1.10316e+08	2.67045e+07	0.242073
MBJ2346058.1	RidA family protein [Pseudomonas canavaninivorans]	73.81	7.4289e+07	1.7962e+07	0.241785
MBJ2347246.1	choline dehydrogenase [Pseudomonas canavaninivorans]	4.76	6530215	1.57817e+06	0.241672
MBJ2350460.1	MCP four helix bundle domain-containing protein [Pseudomonas canavaninivorans]	43.12	5.3833e+08	1.30076e+08	0.241629
MBJ2347512.1	glycogen debranching protein GlgX [Pseudomonas canavaninivorans]	22.95	3.18194e+07	7.68779e+06	0.241607
MBJ2348709.1	ferric iron uptake transcriptional regulator [Pseudomonas canavaninivorans]	48.51	9.42999e+07	2.26167e+07	0.239838
MBJ2348546.1	response regulator transcription factor [Pseudomonas canavaninivorans]	27.82	5.22499e+07	1.24614e+07	0.238496
MBJ2346974.1	DUF2491 family protein [Pseudomonas canavaninivorans]	37.16	2.82515e+07	6.73377e+06	0.238351
MBJ2347248.1	TldD/PmbA family protein [Pseudomonas canavaninivorans]	21.8	5.61565e+07	1.32085e+07	0.235209
MBJ2350249.1	alanine transaminase [Pseudomonas canavaninivorans]	32.35	6.68246e+07	1.5601e+07	0.233462
MBJ2347912.1	nicotinate phosphoribosyltransferase [Pseudomonas canavaninivorans]	21.57	3.60274e+07	8.28992e+06	0.230101
MBJ2346811.1	aspartate aminotransferase family protein [Pseudomonas canavaninivorans]	8.24	1.39848e+07	3.18565e+06	0.227794
MBJ2348489.1	SPFH/Band 7/PHB domain protein [Pseudomonas canavaninivorans]	17.32	1.6105e+07	3.653e+06	0.226823
MBJ2348907.1	SpoIIE family protein phosphatase [Pseudomonas canavaninivorans]	7.39	1.09341e+07	2.47019e+06	0.225915
MBJ2349087.1	FadR family transcriptional regulator [Pseudomonas canavaninivorans]	26.61	2.84258e+07	6.41261e+06	0.225591
MBJ2347965.1	NUDIX domain-containing protein [Pseudomonas canavaninivorans]	60.49	1.05342e+08	2.37516e+07	0.225472
MBJ2350227.1	MFS transporter [Pseudomonas canavaninivorans]	8.26	1.21083e+07	2.71452e+06	0.224187
MBJ2349175.1	SpoIIE family protein phosphatase [Pseudomonas canavaninivorans]	21.12	1.49047e+07	3.32352e+06	0.222984
MBJ2350489.1	glutathione-disulfide reductase [Pseudomonas canavaninivorans]	49.67	9.26789e+07	2.05607e+07	0.221849
MBJ2348555.1	lipoprotein [Pseudomonas canavaninivorans]	33.9	5.40653e+07	11980184	0.221587
MBJ2349467.1	glycerophosphodiester phosphodiesterase [Pseudomonas canavaninivorans]	34.13	5.73254e+07	1.26511e+07	0.22069
MBJ2348965.1	PasA protein [Pseudomonas canavaninivorans]	37.36	6.15346e+07	1.35035e+07	0.219446
MBJ2346253.1	NADH:flavin oxidoreductase/NADH oxidase [Pseudomonas canavaninivorans]	57.88	1.41285e+08	3.07378e+07	0.217559
MBJ2346250.1	CoA transferase [Pseudomonas canavaninivorans]	28.82	2.41735e+07	5.16478e+06	0.213655
MBJ2350181.1	dTMP kinase [Pseudomonas canavaninivorans]	25.24	1.64069e+07	3.45279e+06	0.210447
MBJ2349531.1	NAD(P)-dependent alcohol dehydrogenase [Pseudomonas canavaninivorans]	22.86	4.3935e+07	9.2423e+06	0.210363
MBJ2347428.1	efflux RND transporter periplasmic adaptor subunit [Pseudomonas canavaninivorans]	27.1	3.20741e+07	6.73695e+06	0.210044
MBJ2350030.1	tryptophan synthase subunit beta [Pseudomonas canavaninivorans]	59.02	3.16982e+08	6.5867e+07	0.207794
MBJ2346004.1	phosphate signaling complex protein PhoU [Pseudomonas canavaninivorans]	35.18	3.73103e+07	7.67406e+06	0.205682
MBJ2349578.1	3-oxoacyl-ACP reductase FabG [Pseudomonas canavaninivorans]	41.13	5.66781e+07	1.16393e+07	0.205357
MBJ2347506.1	D-2-hydroxyacid dehydrogenase family protein [Pseudomonas canavaninivorans]	35	4.89256e+07	1.00208e+07	0.204816
MBJ2348674.1	PTS fructose-like transporter subunit IIB [Pseudomonas canavaninivorans]	10.67	2.74379e+07	5.61777e+06	0.204745
MBJ2350463.1	response regulator [Pseudomonas canavaninivorans]	74.59	3.01895e+08	6.04738e+07	0.200314
MBJ2348925.1	chemotaxis response regulator protein-glutamate methylesterase [Pseudomonas canavaninivorans]	36.6	7.38581e+07	14733973	0.19949
MBJ2348998.1	FixH family protein [Pseudomonas canavaninivorans]	15.08	3.1635e+07	6.20444e+06	0.196126
MBJ2345192.1	PilT/PilU family type 4a pilus ATPase [Pseudomonas canavaninivorans]	14.78	2.46591e+07	4.81379e+06	0.195213
MBJ2347113.1	xylose isomerase [Pseudomonas canavaninivorans]	39.04	4.36763e+07	8.46287e+06	0.193764
MBJ2348243.1	DUF2339 domain-containing protein [Pseudomonas canavaninivorans]	6.14	1.50568e+07	2870748	0.190662
MBJ2350211.1	glutathione S-transferase [Pseudomonas canavaninivorans]	32.85	1.05227e+08	1.96227e+07	0.186479
MBJ2347447.1	xylulokinase [Pseudomonas canavaninivorans]	13.74	2.47041e+07	4.32122e+06	0.174919
MBJ2349581.1	phosphoadenylyl-sulfate reductase [Pseudomonas canavaninivorans]	28.74	5.01547e+07	8.65245e+06	0.172515
MBJ2350586.1	orotidine-5'-phosphate decarboxylase [Pseudomonas canavaninivorans]	35.34	1.92192e+07	3.20564e+06	0.166794
MBJ2345224.1	LysR family transcriptional regulator [Pseudomonas canavaninivorans]	12.93	1.16644e+07	1.91888e+06	0.164507
MBJ2348285.1	class II poly(R)-hydroxyalkanoic acid synthase [Pseudomonas canavaninivorans]	50.18	1.00989e+08	1.65906e+07	0.16428
MBJ2346338.1	S-formylglutathione hydrolase [Pseudomonas canavaninivorans]	20.28	1.77154e+07	2.82737e+06	0.1596
MBJ2347549.1	GNAT family N-acetyltransferase [Pseudomonas canavaninivorans]	36.36	4.76866e+07	7.29064e+06	0.152887
MBJ2349520.1	bacterioferritin [Pseudomonas canavaninivorans]	36.94	4.81006e+07	7.28882e+06	0.151533
MBJ2349193.1	ABC transporter ATP-binding protein [Pseudomonas canavaninivorans]	29.41	4.00162e+07	5.86789e+06	0.146638
MBJ2349414.1	DNA starvation/stationary phase protection protein [Pseudomonas canavaninivorans]	56.05	6.62349e+07	9.51555e+06	0.143664
MBJ2347508.1	malto-oligosyltrehalose trehalohydrolase [Pseudomonas canavaninivorans]	9.17	3.89222e+07	5.2168e+06	0.134032
MBJ2348676.1	phosphoenolpyruvate--protein phosphotransferase [Pseudomonas canavaninivorans]	21.7	2.64889e+07	3.45959e+06	0.130605
MBJ2349525.1	glutathione S-transferase family protein [Pseudomonas canavaninivorans]	57.14	9.35019e+07	1.19679e+07	0.127996
MBJ2349851.1	chemotaxis protein CheV [Pseudomonas canavaninivorans]	22.4	4.65324e+07	5.89182e+06	0.126618
MBJ2349252.1	glycine cleavage system protein R [Pseudomonas canavaninivorans]	44.77	4.04423e+07	5.02204e+06	0.124178
MBJ2347793.1	glycine cleavage system protein R [Pseudomonas canavaninivorans]	22.58	3.88518e+07	4.75493e+06	0.122386
MBJ2350029.1	tryptophan synthase subunit alpha [Pseudomonas canavaninivorans]	35.56	1.86482e+08	2.02082e+07	0.108365
MBJ2349369.1	acetyl-CoA C-acetyltransferase [Pseudomonas canavaninivorans]	29.41	1.39646e+07	1.34446e+06	0.0962762
MBJ2347510.1	malto-oligosyltrehalose synthase [Pseudomonas canavaninivorans]	22.31	3.49468e+07	3.22586e+06	0.092308
MBJ2345565.1	hypothetical protein JFQ02_01975 [Pseudomonas canavaninivorans]	44.83	1.76151e+08	1.61086e+07	0.0914476
MBJ2350461.1	chemotaxis protein CheA [Pseudomonas canavaninivorans]	27.47	6.49691e+07	5.86041e+06	0.0902031
MBJ2348827.1	phosphogluconate dehydratase [Pseudomonas canavaninivorans]	71.05	5.86045e+08	4.95277e+07	0.0845118
MBJ2347244.1	transcriptional regulator BetI [Pseudomonas canavaninivorans]	27.67	6.98562e+06	521990	0.0747235
MBJ2350456.1	chemotaxis response regulator protein-glutamate methylesterase [Pseudomonas canavaninivorans]	45.68	3.52664e+07	2.54017e+06	0.072028
MBJ2345835.1	peptide deformylase [Pseudomonas canavaninivorans]	30.95	3.52473e+07	2.5138e+06	0.0713191
MBJ2346713.1	signal peptidase I [Pseudomonas canavaninivorans]	54.93	5.33266e+08	3.63534e+07	0.0681713
MBJ2348985.1	cytochrome-c oxidase, cbb3-type subunit II [Pseudomonas canavaninivorans]	28.71	5.32946e+07	3.53579e+06	0.0663442
MBJ2345973.1	acetyl-CoA carboxylase biotin carboxylase subunit [Pseudomonas canavaninivorans]	63.48	4.63274e+08	3.01543e+07	0.0650896
MBJ2350459.1	purine-binding chemotaxis protein CheW [Pseudomonas canavaninivorans]	28.09	1.60338e+08	1.04354e+07	0.0650836
MBJ2345974.1	sodium-extruding oxaloacetate decarboxylase subunit alpha [Pseudomonas canavaninivorans]	64.29	4.5383e+08	2.95182e+07	0.0650425
MBJ2348511.1	glycerol-3-phosphate transporter [Pseudomonas canavaninivorans]	25.84	2.78736e+08	1.78489e+07	0.0640353
MBJ2345615.1	ABC transporter ATP-binding protein [Pseudomonas canavaninivorans]	29.12	2.59377e+07	1.40947e+06	0.0543405
MBJ2348841.1	bifunctional 4-hydroxy-2-oxoglutarate aldolase/2-dehydro-3-deoxy-phosphogluconate aldolase [Pseudomonas canavaninivorans]	76.47	3.89116e+08	1.98913e+07	0.0511193
MBJ2348839.1	glucose-6-phosphate dehydrogenase [Pseudomonas canavaninivorans]	55.1	7.05446e+08	3.58519e+07	0.0508216
MBJ2348826.1	type I glyceraldehyde-3-phosphate dehydrogenase [Pseudomonas canavaninivorans]	92.19	3.64183e+09	1.76872e+08	0.0485668
MBJ2348840.1	6-phosphogluconolactonase [Pseudomonas canavaninivorans]	87.34	1.28877e+09	5.38747e+07	0.041803
MBJ2347680.1	DUF2384 domain-containing protein [Pseudomonas canavaninivorans]	13.97	3.84073e+08	1.55555e+07	0.0405014
MBJ2349726.1	glycerol-3-phosphate dehydrogenase [Pseudomonas canavaninivorans]	79.49	1.54913e+09	2.40929e+07	0.0155526
MBJ2349959.1	type II secretion system F family protein [Pseudomonas canavaninivorans]	11.6	3.92818e+08	3.87885e+06	0.00987442
MBJ2349612.1	FKBP-type peptidyl-prolyl cis-trans isomerase [Pseudomonas canavaninivorans]	52.21	3.30476e+07	0	0
MBJ2348828.1	glucokinase [Pseudomonas canavaninivorans]	50.16	8.8447e+07	0	0
MBJ2347164.1	hypothetical protein JFQ02_10065 [Pseudomonas canavaninivorans]	49.33	3.42269e+07	0	0
MBJ2345785.1	sulfurtransferase complex subunit TusD [Pseudomonas canavaninivorans]	46.15	1.31386e+07	0	0
MBJ2347161.1	glutathione-dependent disulfide-bond oxidoreductase [Pseudomonas canavaninivorans]	40.5	4.35932e+07	0	0
MBJ2350009.1	ferritin-like domain-containing protein [Pseudomonas canavaninivorans]	38.55	1.15923e+07	0	0
MBJ2347792.1	peroxiredoxin [Pseudomonas canavaninivorans]	36.31	2.09217e+07	0	0
MBJ2348568.1	aldose 1-epimerase family protein [Pseudomonas canavaninivorans]	35.64	8.28006e+07	0	0
MBJ2350442.1	hydroxyisourate hydrolase [Pseudomonas canavaninivorans]	34.19	4.93956e+06	0	0
MBJ2345918.1	F0F1 ATP synthase subunit delta [Pseudomonas canavaninivorans]	33.15	1.84337e+07	0	0
MBJ2347597.1	RNA pyrophosphohydrolase [Pseudomonas canavaninivorans]	32.7	5.6979e+06	0	0
MBJ2349481.1	threonylcarbamoyl-AMP synthase [Pseudomonas canavaninivorans]	32.06	1.91124e+07	0	0
MBJ2349613.1	peptidase M4 family protein [Pseudomonas canavaninivorans]	31.92	7.22743e+07	0	0
MBJ2347827.1	MFS transporter [Pseudomonas canavaninivorans]	31.71	1.26671e+07	0	0
MBJ2345838.1	threonylcarbamoyl-AMP synthase [Pseudomonas canavaninivorans]	30.81	1.18389e+07	0	0
MBJ2347952.1	sulfurtransferase [Pseudomonas canavaninivorans]	29.52	2.30807e+07	0	0
MBJ2346557.1	hypothetical protein JFQ02_07005 [Pseudomonas canavaninivorans]	29.46	1.36455e+07	0	0
MBJ2348173.1	GntR family transcriptional regulator [Pseudomonas canavaninivorans]	29.22	7.49494e+06	0	0
MBJ2347061.1	Lrp/AsnC family transcriptional regulator [Pseudomonas canavaninivorans]	28.93	2.25267e+08	0	0
MBJ2349051.1	STAS domain-containing protein [Pseudomonas canavaninivorans]	28.71	5.82624e+06	0	0
MBJ2349406.1	tol-pal system-associated acyl-CoA thioesterase [Pseudomonas canavaninivorans]	27.74	1.91939e+07	0	0
MBJ2347148.1	DeoR/GlpR transcriptional regulator [Pseudomonas canavaninivorans]	26.82	1.53038e+07	0	0
MBJ2349841.1	dienelactone hydrolase family protein [Pseudomonas canavaninivorans]	26.72	3.96024e+07	0	0
MBJ2349174.1	STAS domain-containing protein [Pseudomonas canavaninivorans]	26.25	2.34408e+07	0	0
MBJ2349417.1	HIT domain-containing protein [Pseudomonas canavaninivorans]	26.24	9.68318e+06	0	0
MBJ2345933.1	nicotinate phosphoribosyltransferase [Pseudomonas canavaninivorans]	25.67	1.75506e+07	0	0
MBJ2346524.1	malate dehydrogenase (quinone) [Pseudomonas canavaninivorans]	25.59	1.45917e+08	0	0
MBJ2347018.1	oxidoreductase [Pseudomonas canavaninivorans]	25.35	8.33112e+07	0	0
MBJ2346641.1	DUF3833 domain-containing protein [Pseudomonas canavaninivorans]	25.14	1.42726e+07	0	0
MBJ2347659.1	dTDP-4-dehydrorhamnose 3,5-epimerase [Pseudomonas canavaninivorans]	24.86	1.76326e+07	0	0
MBJ2347286.1	16S rRNA (uracil(1498)-N(3))-methyltransferase [Pseudomonas canavaninivorans]	24.27	1.31557e+07	0	0
MBJ2349404.1	protein TolR [Pseudomonas canavaninivorans]	24	2.80018e+07	0	0
MBJ2346275.1	hypothetical protein JFQ02_05575 [Pseudomonas canavaninivorans]	23.91	7.78631e+06	0	0
MBJ2350425.1	acireductone synthase [Pseudomonas canavaninivorans]	23.58	1.28893e+07	0	0
MBJ2348809.1	hypothetical protein JFQ02_18430 [Pseudomonas canavaninivorans]	23.48	3.3697e+07	0	0
MBJ2348926.1	flagellar motor protein [Pseudomonas canavaninivorans]	23.17	4.13317e+07	0	0
MBJ2349811.1	DnaA regulatory inactivator Hda [Pseudomonas canavaninivorans]	23.08	8.26394e+06	0	0
MBJ2348928.1	ParA family protein [Pseudomonas canavaninivorans]	22.81	1.51821e+07	0	0
MBJ2349652.1	hypothetical protein JFQ02_22725 [Pseudomonas canavaninivorans]	22.17	6.62394e+06	0	0
MBJ2347220.1	GMC family oxidoreductase N-terminal domain-containing protein [Pseudomonas canavaninivorans]	22.09	5.24582e+07	0	0
MBJ2345518.1	aspartate-semialdehyde dehydrogenase [Pseudomonas canavaninivorans]	22.02	3.26604e+07	0	0
MBJ2349517.1	ribonuclease T [Pseudomonas canavaninivorans]	21.78	1.30158e+07	0	0
MBJ2349831.1	DNA-3-methyladenine glycosylase I [Pseudomonas canavaninivorans]	21.43	1.39183e+07	0	0
MBJ2346317.1	di-trans,poly-cis-decaprenylcistransferase [Pseudomonas canavaninivorans]	21.12	1.09652e+07	0	0
MBJ2347752.1	SDR family oxidoreductase [Pseudomonas canavaninivorans]	20.86	8.9983e+06	0	0
MBJ2346245.1	DsbC family protein [Pseudomonas canavaninivorans]	20.58	1.21551e+07	0	0
MBJ2346056.1	SDR family oxidoreductase [Pseudomonas canavaninivorans]	20.35	5.21077e+06	0	0
MBJ2345912.1	ParA family protein [Pseudomonas canavaninivorans]	19.62	1.53416e+07	0	0
MBJ2347318.1	YggS family pyridoxal phosphate-dependent enzyme [Pseudomonas canavaninivorans]	19.57	6.63265e+06	0	0
MBJ2348118.1	oxidoreductase [Pseudomonas canavaninivorans]	19.51	1.49959e+07	0	0
MBJ2346071.1	DNA repair protein RadC [Pseudomonas canavaninivorans]	18.75	1.2779e+07	0	0
MBJ2348848.1	MaoC family dehydratase [Pseudomonas canavaninivorans]	18.59	9.50671e+06	0	0
MBJ2348282.1	phasin family protein [Pseudomonas canavaninivorans]	18.57	1.76404e+07	0	0
MBJ2349872.1	HAD family hydrolase [Pseudomonas canavaninivorans]	18.43	1.85873e+07	0	0
MBJ2347586.1	AAA family ATPase [Pseudomonas canavaninivorans]	18.39	8.91539e+06	0	0
MBJ2346689.1	siderophore-interacting protein [Pseudomonas canavaninivorans]	18.39	6.34313e+06	0	0
MBJ2349561.1	SDR family oxidoreductase [Pseudomonas canavaninivorans]	18.25	5.95561e+06	0	0
MBJ2350431.1	hypothetical protein JFQ02_26690 [Pseudomonas canavaninivorans]	17.94	9.1769e+06	0	0
MBJ2346290.1	class I SAM-dependent methyltransferase [Pseudomonas canavaninivorans]	17.37	4.34671e+06	0	0
MBJ2349792.1	PLP-dependent aminotransferase family protein [Pseudomonas canavaninivorans]	17.27	2.82098e+07	0	0
MBJ2347676.1	GNAT family N-acetyltransferase [Pseudomonas canavaninivorans]	17.24	1.81294e+07	0	0
MBJ2348298.1	pilus assembly protein PilM [Pseudomonas canavaninivorans]	17.23	1.00205e+07	0	0
MBJ2348583.1	DsbA family protein [Pseudomonas canavaninivorans]	17	3.68075e+06	0	0
MBJ2347876.1	type I secretion system permease/ATPase [Pseudomonas canavaninivorans]	16.97	1.65904e+07	0	0
MBJ2345790.1	cysteine hydrolase [Pseudomonas canavaninivorans]	16.95	1.9839e+07	0	0
MBJ2349777.1	membrane integrity-associated transporter subunit PqiC [Pseudomonas canavaninivorans]	16.85	9.86484e+06	0	0
MBJ2349365.1	DUF4136 domain-containing protein [Pseudomonas canavaninivorans]	16.83	6.62633e+06	0	0
MBJ2350435.1	Smr/MutS family protein [Pseudomonas canavaninivorans]	16.76	1.94135e+07	0	0
MBJ2346809.1	alpha/beta hydrolase [Pseudomonas canavaninivorans]	16.75	2.07943e+06	0	0
MBJ2349501.1	membrane protein FxsA [Pseudomonas canavaninivorans]	16.46	2.30475e+07	0	0
MBJ2348398.1	hypothetical protein JFQ02_16325 [Pseudomonas canavaninivorans]	16.46	7.2893e+06	0	0
MBJ2349804.1	CoA transferase subunit A [Pseudomonas canavaninivorans]	16.38	6.00044e+06	0	0
MBJ2348107.1	ABC transporter ATP-binding protein [Pseudomonas canavaninivorans]	16.3	1.62554e+07	0	0
MBJ2345932.1	nicotinamidase [Pseudomonas canavaninivorans]	16.28	3.84625e+07	0	0
MBJ2347338.1	16S rRNA (guanine(966)-N(2))-methyltransferase RsmD [Pseudomonas canavaninivorans]	16.26	5.64764e+06	0	0
MBJ2346009.1	phosphate regulon transcriptional regulator PhoB [Pseudomonas canavaninivorans]	16.16	1.60354e+07	0	0
MBJ2347691.1	AAA family ATPase [Pseudomonas canavaninivorans]	16.15	7.8273e+06	0	0
MBJ2347875.1	HlyD family type I secretion periplasmic adaptor subunit [Pseudomonas canavaninivorans]	15.86	1.66009e+07	0	0
MBJ2348237.1	chorismate mutase [Pseudomonas canavaninivorans]	15.68	8.21507e+06	0	0
MBJ2349850.1	protein-glutamate O-methyltransferase CheR [Pseudomonas canavaninivorans]	15.64	2.26748e+07	0	0
MBJ2349577.1	HAD-IA family hydrolase [Pseudomonas canavaninivorans]	15.58	2.43893e+07	0	0
MBJ2350585.1	NADP-dependent oxidoreductase [Pseudomonas canavaninivorans]	15.57	9.26341e+06	0	0
MBJ2347943.1	tRNA (adenosine(37)-N6)-threonylcarbamoyltransferase complex ATPase subunit type 1 TsaE [Pseudomonas canavaninivorans]	15.48	6.51138e+06	0	0
MBJ2346986.1	hypothetical protein JFQ02_09175 [Pseudomonas canavaninivorans]	15.23	2.62417e+07	0	0
MBJ2348085.1	3-deoxy-7-phosphoheptulonate synthase class II [Pseudomonas canavaninivorans]	15.18	2.05051e+07	0	0
MBJ2348277.1	phosphoribosyl-AMP cyclohydrolase [Pseudomonas canavaninivorans]	15.15	6.95294e+07	0	0
MBJ2348759.1	virulence factor family protein [Pseudomonas canavaninivorans]	14.92	1.12125e+07	0	0
MBJ2349797.1	alpha-1,4-glucan--maltose-1-phosphate maltosyltransferase [Pseudomonas canavaninivorans]	14.89	1.60593e+07	0	0
MBJ2348576.1	polyphosphate:AMP phosphotransferase [Pseudomonas canavaninivorans]	14.71	1.90384e+07	0	0
MBJ2350443.1	allantoinase PuuE [Pseudomonas canavaninivorans]	14.61	3.0599e+08	0	0
MBJ2347323.1	DUF4426 domain-containing protein [Pseudomonas canavaninivorans]	14.58	1.58257e+07	0	0
MBJ2348364.1	response regulator transcription factor [Pseudomonas canavaninivorans]	14.54	1.45763e+07	0	0
MBJ2349064.1	RNase adapter RapZ [Pseudomonas canavaninivorans]	14.39	3.84454e+07	0	0
MBJ2347685.1	hypothetical protein JFQ02_12690 [Pseudomonas canavaninivorans]	14.25	6.99605e+06	0	0
MBJ2346284.1	tRNA (adenosine(37)-N6)-threonylcarbamoyltransferase complex dimerization subunit type 1 TsaB [Pseudomonas canavaninivorans]	14.22	1.82052e+07	0	0
MBJ2346951.1	riboflavin synthase [Pseudomonas canavaninivorans]	14.22	2.60552e+07	0	0
MBJ2346205.1	Fe-S protein assembly chaperone HscA [Pseudomonas canavaninivorans]	14.19	3.73889e+07	0	0
MBJ2346236.1	MHS family MFS transporter [Pseudomonas canavaninivorans]	14.19	1.80962e+07	0	0
MBJ2347257.1	EAL domain-containing protein [Pseudomonas canavaninivorans]	14.14	2.25396e+07	0	0
MBJ2345322.1	molecular chaperone HscC [Pseudomonas canavaninivorans]	14.13	1.08985e+07	0	0
MBJ2347327.1	tRNA (guanosine(46)-N7)-methyltransferase TrmB [Pseudomonas canavaninivorans]	14.11	2.45187e+07	0	0
MBJ2347887.1	DnaJ domain-containing protein [Pseudomonas canavaninivorans]	14.1	1.45906e+07	0	0
MBJ2346147.1	2-hydroxyacid dehydrogenase [Pseudomonas canavaninivorans]	14.02	3.217e+07	0	0
MBJ2345223.1	amidohydrolase family protein [Pseudomonas canavaninivorans]	13.94	6.81459e+06	0	0
MBJ2345618.1	carbohydrate ABC transporter permease [Pseudomonas canavaninivorans]	13.91	3.27373e+07	0	0
MBJ2345373.1	ABC transporter permease [Pseudomonas canavaninivorans]	13.6	9.9276e+06	0	0
MBJ2345616.1	ABC transporter ATP-binding protein [Pseudomonas canavaninivorans]	13.55	2.76715e+07	0	0
MBJ2349380.1	helix-turn-helix transcriptional regulator [Pseudomonas canavaninivorans]	13.52	3.86268e+06	0	0
MBJ2347337.1	insulinase family protein [Pseudomonas canavaninivorans]	13.51	9.21736e+06	0	0
MBJ2348646.1	guanine deaminase [Pseudomonas canavaninivorans]	13.13	1.13559e+07	0	0
MBJ2348582.1	rhodanese-related sulfurtransferase [Pseudomonas canavaninivorans]	13.1	1.03575e+07	0	0
MBJ2347951.1	HDOD domain-containing protein [Pseudomonas canavaninivorans]	12.7	1.56334e+07	0	0
MBJ2349367.1	acyl dehydratase [Pseudomonas canavaninivorans]	12.68	1.09717e+07	0	0
MBJ2350219.1	3-oxoadipate enol-lactonase [Pseudomonas canavaninivorans]	12.03	7.77073e+06	0	0
MBJ2350352.1	D-glycerate dehydrogenase [Pseudomonas canavaninivorans]	12	3.64252e+06	0	0
MBJ2347982.1	GNAT family N-acetyltransferase [Pseudomonas canavaninivorans]	11.74	4.21856e+06	0	0
MBJ2346271.1	PleD family two-component system response regulator [Pseudomonas canavaninivorans]	11.71	7.3784e+06	0	0
MBJ2347995.1	lipopolysaccharide heptosyltransferase I [Pseudomonas canavaninivorans]	11.65	1.17252e+07	0	0
MBJ2348389.1	ABC transporter substrate-binding protein [Pseudomonas canavaninivorans]	11.61	7.24993e+06	0	0
MBJ2350458.1	protein-glutamate O-methyltransferase CheR [Pseudomonas canavaninivorans]	11.51	3.51469e+07	0	0
MBJ2350234.1	cache domain-containing protein [Pseudomonas canavaninivorans]	11.51	1.65333e+07	0	0
MBJ2348260.1	imidazolonepropionase [Pseudomonas canavaninivorans]	11.5	4.5245e+06	0	0
MBJ2346171.1	hypothetical protein JFQ02_05045 [Pseudomonas canavaninivorans]	11.46	2.07749e+07	0	0
MBJ2345943.1	LysR family transcriptional regulator [Pseudomonas canavaninivorans]	11.41	1.06236e+07	0	0
MBJ2348797.1	PLP-dependent cysteine synthase family protein [Pseudomonas canavaninivorans]	11.26	1.72857e+07	0	0
MBJ2348587.1	EAL domain-containing protein [Pseudomonas canavaninivorans]	11.23	1.17795e+07	0	0
MBJ2345808.1	cytochrome c oxidase subunit 3 [Pseudomonas canavaninivorans]	11.19	2.41518e+07	0	0
MBJ2347721.1	ABC transporter substrate-binding protein [Pseudomonas canavaninivorans]	10.89	1.29437e+07	0	0
MBJ2347463.1	undecaprenyl-diphosphate phosphatase [Pseudomonas canavaninivorans]	10.87	7.53848e+06	0	0
MBJ2349246.1	biotin synthase BioB [Pseudomonas canavaninivorans]	10.83	1.33895e+07	0	0
MBJ2348239.1	tRNA 4-thiouridine(8) synthase ThiI [Pseudomonas canavaninivorans]	10.74	1.37586e+07	0	0
MBJ2345187.1	IclR family transcriptional regulator [Pseudomonas canavaninivorans]	10.63	4.94559e+06	0	0
MBJ2347885.1	urease subunit alpha [Pseudomonas canavaninivorans]	10.6	9.25244e+06	0	0
MBJ2345836.1	LysM peptidoglycan-binding domain-containing protein [Pseudomonas canavaninivorans]	10.56	9.25201e+06	0	0
MBJ2349557.1	hypothetical protein JFQ02_22225 [Pseudomonas canavaninivorans]	10.53	6.93505e+06	0	0
MBJ2348953.1	N-acetylglutaminylglutamine amidotransferase [Pseudomonas canavaninivorans]	10.51	3.0594e+07	0	0
MBJ2350469.1	OBAP family protein [Pseudomonas canavaninivorans]	10.4	1.41262e+07	0	0
MBJ2347077.1	diguanylate cyclase [Pseudomonas canavaninivorans]	10.38	1.07886e+07	0	0
MBJ2348650.1	D-alanyl-D-alanine carboxypeptidase/D-alanyl-D-alanine-endopeptidase [Pseudomonas canavaninivorans]	10.25	1.02798e+07	0	0
MBJ2347437.1	protein-glutamate O-methyltransferase CheR [Pseudomonas canavaninivorans]	9.96	3.29175e+06	0	0
MBJ2346670.1	GHKL domain-containing protein [Pseudomonas canavaninivorans]	9.85	1.69819e+07	0	0
MBJ2345728.1	GlxA family transcriptional regulator [Pseudomonas canavaninivorans]	9.81	1.31023e+07	0	0
MBJ2347491.1	Ldh family oxidoreductase [Pseudomonas canavaninivorans]	9.62	9.52336e+06	0	0
MBJ2349723.1	aquaporin [Pseudomonas canavaninivorans]	9.54	107561267	0	0
MBJ2345871.1	homoserine kinase [Pseudomonas canavaninivorans]	9.49	1.33334e+07	0	0
MBJ2349526.1	2-dehydro-3-deoxygalactonokinase [Pseudomonas canavaninivorans]	9.48	6.74753e+06	0	0
MBJ2348485.1	inorganic triphosphatase [Pseudomonas canavaninivorans]	9.45	1.28835e+07	0	0
MBJ2345374.1	polysaccharide pyruvyl transferase family protein [Pseudomonas canavaninivorans]	9.42	1.19858e+07	0	0
MBJ2345829.1	hypothetical protein JFQ02_03310 [Pseudomonas canavaninivorans]	9.41	1.00226e+07	0	0
MBJ2346971.1	YjfI family protein [Pseudomonas canavaninivorans]	9.33	4.69178e+06	0	0
MBJ2349960.1	type IV-A pilus assembly ATPase PilB [Pseudomonas canavaninivorans]	9.19	6.17356e+06	0	0
MBJ2350236.1	NAD(P)-dependent oxidoreductase [Pseudomonas canavaninivorans]	9.09	1.05574e+07	0	0
MBJ2349101.1	ABC transporter ATP-binding protein [Pseudomonas canavaninivorans]	9.01	1.24927e+07	0	0
MBJ2345641.1	ABC transporter ATP-binding protein [Pseudomonas canavaninivorans]	9.01	4.53955e+06	0	0
MBJ2347070.1	hypothetical protein JFQ02_09595 [Pseudomonas canavaninivorans]	8.68	8.7741e+06	0	0
MBJ2346349.1	helix-turn-helix transcriptional regulator [Pseudomonas canavaninivorans]	8.61	1.41361e+07	0	0
MBJ2348877.1	DegT/DnrJ/EryC1/StrS family aminotransferase [Pseudomonas canavaninivorans]	8.6	5.60871e+06	0	0
MBJ2348696.1	dihydropteroate synthase [Pseudomonas canavaninivorans]	8.48	1.1773e+07	0	0
MBJ2348885.1	flagellar basal body P-ring protein FlgI [Pseudomonas canavaninivorans]	8.43	4.90447e+06	0	0
MBJ2348820.1	CoA transferase [Pseudomonas canavaninivorans]	8.26	1.65725e+07	0	0
MBJ2347970.1	lipid IV(A) 3-deoxy-D-manno-octulosonic acid transferase [Pseudomonas canavaninivorans]	8.25	6.96424e+06	0	0
MBJ2346260.1	ABC transporter ATP-binding protein [Pseudomonas canavaninivorans]	8.14	5.91168e+06	0	0
MBJ2349334.1	bifunctional cobalt-precorrin-7 (C(5))-methyltransferase/cobalt-precorrin-6B (C(15))-methyltransferase [Pseudomonas canavaninivorans]	7.94	9.86399e+06	0	0
MBJ2348988.1	cytochrome-c oxidase, cbb3-type subunit I [Pseudomonas canavaninivorans]	7.92	9.1371e+07	0	0
MBJ2348832.1	carbohydrate ABC transporter substrate-binding protein [Pseudomonas canavaninivorans]	7.85	2.15078e+07	0	0
MBJ2350450.1	lipid A biosynthesis lauroyl acyltransferase [Pseudomonas canavaninivorans]	7.74	1.26867e+07	0	0
MBJ2347242.1	choline ABC transporter ATP-binding protein [Pseudomonas canavaninivorans]	7.65	1.20552e+07	0	0
MBJ2349328.1	TonB-dependent copper receptor [Pseudomonas canavaninivorans]	7.63	4.84639e+06	0	0
MBJ2349090.1	HAMP domain-containing histidine kinase [Pseudomonas canavaninivorans]	7.62	8.65329e+06	0	0
MBJ2346667.1	EAL domain-containing protein [Pseudomonas canavaninivorans]	7.47	1.14009e+07	0	0
MBJ2350197.1	XdhC family protein [Pseudomonas canavaninivorans]	7.43	2.42676e+07	0	0
MBJ2346708.1	membrane-bound lytic murein transglycosylase MltF [Pseudomonas canavaninivorans]	7.41	3.61276e+06	0	0
MBJ2348329.1	glycosyltransferase family 2 protein [Pseudomonas canavaninivorans]	7.38	9.23419e+06	0	0
MBJ2347546.1	MdtA/MuxA family multidrug efflux RND transporter periplasmic adaptor subunit [Pseudomonas canavaninivorans]	7.31	4.55863e+06	0	0
MBJ2346877.1	pantothenate kinase [Pseudomonas canavaninivorans]	7.23	4.95796e+06	0	0
MBJ2347635.1	HAMP domain-containing protein [Pseudomonas canavaninivorans]	7.09	4.69347e+06	0	0
MBJ2350200.1	UDP-N-acetylmuramate dehydrogenase [Pseudomonas canavaninivorans]	7.08	8.52793e+06	0	0
MBJ2348360.1	Zn-dependent hydrolase [Pseudomonas canavaninivorans]	7.03	7.02618e+06	0	0
MBJ2349798.1	maltose alpha-D-glucosyltransferase [Pseudomonas canavaninivorans]	6.55	3.86262e+06	0	0
MBJ2348293.1	primosomal protein N' [Pseudomonas canavaninivorans]	6.5	6.33098e+06	0	0
MBJ2346002.1	phosphate ABC transporter permease PstA [Pseudomonas canavaninivorans]	6.29	3.0876e+06	0	0
MBJ2345617.1	sugar ABC transporter permease [Pseudomonas canavaninivorans]	6.25	2.59075e+07	0	0
MBJ2346851.1	Glu/Leu/Phe/Val dehydrogenase [Pseudomonas canavaninivorans]	6.19	5.33669e+06	0	0
MBJ2346252.1	single-stranded-DNA-specific exonuclease RecJ [Pseudomonas canavaninivorans]	6.15	5.30295e+06	0	0
MBJ2348363.1	HAMP domain-containing histidine kinase [Pseudomonas canavaninivorans]	6.07	7.84364e+06	0	0
MBJ2347210.1	xanthine dehydrogenase family protein molybdopterin-binding subunit [Pseudomonas canavaninivorans]	6.03	1.19394e+08	0	0
MBJ2347849.1	alpha/beta fold hydrolase [Pseudomonas canavaninivorans]	5.99	1.46545e+07	0	0
MBJ2347359.1	DUF2868 domain-containing protein [Pseudomonas canavaninivorans]	5.93	5.20566e+06	0	0
MBJ2349234.1	pyrroloquinoline quinone biosynthesis protein PqqE [Pseudomonas canavaninivorans]	5.74	6.29203e+06	0	0
MBJ2348086.1	YcaQ family DNA glycosylase [Pseudomonas canavaninivorans]	5.62	1.15522e+07	0	0
MBJ2349824.1	2-hydroxyacid dehydrogenase [Pseudomonas canavaninivorans]	5.47	2.45725e+07	0	0
MBJ2348328.1	glycosyl transferase [Pseudomonas canavaninivorans]	5.45	7.63629e+06	0	0
MBJ2349100.1	ABC transporter permease subunit [Pseudomonas canavaninivorans]	5.28	1.71495e+07	0	0
MBJ2348149.1	PAS domain S-box protein [Pseudomonas canavaninivorans]	4.67	8.02015e+06	0	0
MBJ2349737.1	sigma-54-dependent transcriptional regulator [Pseudomonas canavaninivorans]	4.58	4.55221e+06	0	0
MBJ2346001.1	ABC transporter permease subunit [Pseudomonas canavaninivorans]	4.58	1.18834e+07	0	0
MBJ2346008.1	phosphate regulon sensor histidine kinase PhoR [Pseudomonas canavaninivorans]	4.55	6.98963e+06	0	0
MBJ2346648.1	GGDEF domain-containing protein [Pseudomonas canavaninivorans]	4.21	1.02202e+07	0	0
MBJ2348537.1	ATP-binding cassette domain-containing protein [Pseudomonas canavaninivorans]	3.77	5.22296e+06	0	0
MBJ2349666.1	EAL domain-containing protein [Pseudomonas canavaninivorans]	3.46	6731938	0	0
MBJ2348001.1	EAL domain-containing protein [Pseudomonas canavaninivorans]	3.34	7.25583e+06	0	0
MBJ2348760.1	bifunctional lysylphosphatidylglycerol flippase/synthetase MprF [Pseudomonas canavaninivorans]	3.3	7.81306e+06	0	0
MBJ2345372.1	glycosyltransferase [Pseudomonas canavaninivorans]	3.06	8.15911e+06	0	0
MBJ2346293.1	efflux RND transporter permease subunit [Pseudomonas canavaninivorans]	2.94	1.58386e+06	0	0
MBJ2347648.1	FdhF/YdeP family oxidoreductase [Pseudomonas canavaninivorans]	2.81	3.18105e+06	0	0
MBJ2348189.1	formate dehydrogenase subunit alpha [Pseudomonas canavaninivorans]	2.61	4.50742e+06	0	0
